# Supplementary material for: Construction of an iminoketenylidene
Source: Royal Society of Chemistry journal article supplement (doi:10.1039/d1cc03310g), 2021-01-01
Supplement: d1cc03310g1.pdf [file d1cc03310g1.pdf]

## Construction of an Iminoketenylidene

Liam K. Burt<sup>[a]</sup> and Anthony F. Hill,<sup>[a]\*</sup>

**Abstract:** The new isonitrile- $\mu$ -carbido complexes [WPt( $\mu$ -C)Br(CNR)(PPh<sub>3</sub>)(CO)<sub>2</sub>(Tp\*)] (R = C<sub>6</sub>H<sub>2</sub>Me<sub>3</sub>-2,4,6, C<sub>6</sub>H<sub>3</sub>Me<sub>2</sub>-2,6; Tp\* = hydrotris(3,5-dimethylpyrazol-1-yl)borate) rearrange irreversibly in polar solvents to provide the first examples of iminoketenylidene (CCNR) complexes.

DOI: 10.1002/anie.2021XXXXX

|                                                                                                                          |        |
|--------------------------------------------------------------------------------------------------------------------------|--------|
| EXPERIMENTAL PROCEDURES.....                                                                                             | 2      |
| GENERAL CONSIDERATIONS.....                                                                                              | 2      |
| CRYSTALLOGRAPHIC DETAILS.....                                                                                            | 2      |
| COMPUTATIONAL DETAILS.....                                                                                               | 2      |
| OPTIMISED GEOMETRIES AND CARTESIAN COORDINATES.....                                                                      | 5      |
| MOLECULAR MECHANICS MODELLING OF BENT CCNC <sub>6</sub> H <sub>3</sub> ME <sub>2</sub> LIGAND IN [5A] <sup>+</sup> ..... | 10     |
| MOLECULAR ORBITALS OF FREE IMINOKETENYLIDENES .....                                                                      | 10     |
| CALCULATED <sup>A</sup> ELECTRONIC SPECTRUM FOR 7MESP .....                                                              | 10     |
| CALCULATED <sup>A</sup> ELECTRONIC SPECTRUM FOR [5A] <sup>+</sup> .....                                                  | 11     |
| AUTHOR CONTRIBUTIONS .....                                                                                               | 11     |
| NOTES AND REFERENCES.....                                                                                                | 11     |
| SELECTED SPECTRA.....                                                                                                    | - 12 - |

---

[a] L. K. Burt and A. F. Hill  
Research School of Chemistry  
The Australian National University  
Canberra, ACT 2601, Australia

\* E-mail: [a.hill@anu.edu.au](mailto:a.hill@anu.edu.au)

---

CCDC 2084966-2084969 and 2085626 contain the supplementary crystallographic data for this paper and are available free of charge from The Cambridge Crystallographic Data Centre.

---

## Experimental Procedures

### General Considerations

Experimental work was performed using standard Schlenk techniques using dried and pre-purified nitrogen or in an inert atmosphere glove-box charged with an argon atmosphere unless specified otherwise. Reactions employed dried and degassed solvents distilled over sodium and benzophenone (ethers, arenes and paraffins) or calcium hydride ( $\text{CH}_2\text{Cl}_2$ , MeCN). The compound  $[\text{WPt}(\mu\text{-C})\text{Br}(\text{CO})_2(\text{PPh}_3)_2(\text{Tp}^*)]$  (**1**)<sup>1a</sup> was prepared according to published procedures. The complex *triangulo*- $[\text{Pt}_3(\text{CNC}_6\text{H}_2\text{Me}_3\text{-}2,4,6)_6]$  was prepared *in situ* in a manner analogous to that described for  $[\text{Pt}_3(\text{CN}^t\text{Bu})_6]$ <sup>1b</sup> from the reaction of  $[\text{Pt}(\eta^2\text{-norbornene})_3]$  and  $\text{CNC}_6\text{H}_2\text{Me}_3$ . All other reagents were used as received from commercial suppliers.

NMR spectra were obtained on a Bruker Avance 400 ( $^1\text{H}$  at 400.1,  $^{13}\text{C}\{^1\text{H}\}$  at 100.6,  $^{31}\text{P}\{^1\text{H}\}$  at 162.0,  $^{195}\text{Pt}\{^1\text{H}\}$  at 85.7 MHz), a Bruker Avance 600 ( $^1\text{H}$  at 600.0,  $^{13}\text{C}\{^1\text{H}\}$  at 150.9 MHz) or a Bruker Avance 700 ( $^1\text{H}$  at 700.0,  $^{13}\text{C}\{^1\text{H}\}$  at 176.1,  $^{31}\text{P}\{^1\text{H}\}$  at 283.4 MHz) spectrometers at the temperatures indicated. Chemical shifts ( $\delta$ ) are reported in ppm with coupling constants given in Hz and are referenced to the solvent resonance or external references  $\{\text{CFCl}_3$  for  $^{19}\text{F}\{^1\text{H}\}$ , 85%  $\text{H}_3\text{PO}_4$  in  $\text{H}_2\text{O}$  for  $^{31}\text{P}\{^1\text{H}\}$ , 1.2M  $\text{Na}_2\text{PtCl}_6$  for  $^{195}\text{Pt}\}$ . The multiplicities of NMR resonances are denoted by the abbreviations s (singlet), d (doublet), t (triplet), m (multiplet), br (broad) and combinations thereof for more highly coupled systems. Where applicable, the stated multiplicity refers to that of the primary resonance exclusive of  $^{183}\text{W}$  or  $^{195}\text{Pt}$  satellites. In select cases, distinct peaks were observed in the  $^1\text{H}$  and  $^{13}\text{C}\{^1\text{H}\}$  NMR spectra, but to the level of accuracy that is reportable (*i.e.*, 2 decimal places for  $^1\text{H}$  NMR, 1 decimal place for  $^{13}\text{C}\{^1\text{H}\}$  NMR) they are reported as having the same chemical shift.

The abbreviation ‘pz’ is used to refer to the pyrazolyl rings on the hydridotris(3,5-dimethylpyrazol-1-yl)borate ( $\text{Tp}^*$ ) ligand. Spectra provided generally correspond to samples obtained directly from chromatography and may contain residual solvent as recrystallised samples often display reduced solubility. The BH protons give rise to very broad signals around 4–5 ppm in the  $^1\text{H}$  NMR spectra due to coupling to the quadrupolar boron nuclei. These are not listed in the experimental NMR data as their chemical shifts and associated integrals are not determined accurately. The BH unit, being remote from the metal centre of interest is not particularly responsive to variations and accordingly  $^{11}\text{B}\{^1\text{H}\}$  NMR spectra were not recorded.

Infrared spectra were obtained using a Shimadzu FTIR-8400 spectrometer (liquid) or Perkin Elmer FTIR Spectrum 2 (Solid State ATR, diamond anvil). Signals are denoted according to their absorption strength such as very sharp (vs), strong (s), medium (m), weak (w) or broad (br). Elemental microanalytical data were provided Macquarie University (Australia). Solvates evident from data were

confirmed where possible by NMR spectroscopy. High-resolution electrospray ionisation mass spectrometry (ESI-MS) was performed by the ANU Research School of Chemistry mass spectrometry service with acetonitrile or dichloromethane as the matrix.

### Crystallographic Details

Data for X-ray crystallography were collected with Agilent Xcalibur or SuperNova CCD diffractometers using Mo-K $\alpha$  radiation ( $\lambda = 0.71073$  Å) or Cu-K $\alpha$  radiation ( $\lambda = 1.54184$  Å) employing the *CrysAlis PRO* software.<sup>2</sup> The structures were solved iteratively (intrinsic phasing) using the SHELXT program and refined by full-matrix least-squares on  $F^2$  using the SHELXL program.<sup>3</sup> Hydrogen atoms were located geometrically and refined using a riding model. Diagrams were produced using the CCDC visualisation program Mercury.<sup>4</sup> We gratefully acknowledge the assistance of Dr M. G. Gardiner with crystallographic analyses.

### Computational Details

Computational studies were performed by using the *SPARTAN18* suite of programs.<sup>5</sup> Geometry optimisation (gas phase) for metal complexes was performed at the DFT level of theory using the exchange functionals  $\omega\text{B97X-D}$  and  $\omega\text{B97X-V}$  of Head-Gordon.<sup>6</sup> The Los Alamos effective core potential type basis set (LANL2D $\zeta$ ) of Hay and Wadt<sup>7</sup> was used for Pt and W and Pople 6-31G\* basis sets<sup>8</sup> were used for all other atoms. For the free iminoketenylidenes, geometries were optimised using the  $\omega\text{BP97X-V}/6\text{-}31\text{G}^*$  combination followed by the second order Møller Plesset method (RI-MP2) in combination with Dunning’s cc-PVT $\zeta$  basis set<sup>9</sup> for frequency and thermodynamics calculations based on these geometries. Frequency calculations were performed for all compounds to confirm that each optimized structure was a minimum and also to identify vibrational modes of interest ( $\nu_{\text{CCN}}$ ). Cartesian atomic coordinates are provided below.

### Synthesis of $[\text{WPt}(\mu\text{-C})\text{Br}(\text{CNC}_6\text{H}_3\text{Me}_2)(\text{CO})_2(\text{PPh}_3)(\text{Tp}^*)]$ (**3a**)

A sample of  $[\text{WPt}(\mu\text{-C})\text{Br}(\text{CO})_2(\text{PPh}_3)_2(\text{Tp}^*)]$  (**1**: 0.631 g, 0.462 mmol) and 2,6-dimethylphenylisonitrile (0.066 g, 0.503 mmol) was stirred in toluene (30 mL) for 16 hours at ambient temperature. The subsequent orange solution had solvent removed *via* rotary evaporation where the residue was sonicated in *n*-hexane (5 x 10 mL), decanted each time to remove excess phosphine. Now free of excess phosphine, flash column chromatography {silica gel,  $\text{N}_2$ , dry loaded, isocratic elution, 75%  $\text{CH}_2\text{Cl}_2$ /petroleum ether 60–80} first eluting the target as an orange band, followed by a minor band returning starting material and  $[\text{WPt}(\mu\text{-C})\text{Br}$

(CNC<sub>6</sub>H<sub>3</sub>Me<sub>2</sub>)<sub>2</sub>(CO)<sub>2</sub>(Tp\*)] (**4a**). The product band was collected and crystallised from CH<sub>2</sub>Cl<sub>2</sub> and EtOH to give an orange solid which was collected *via* vacuum filtration. The solid was washed with EtOH (2 x 5 mL) and *n*-hexane (10 mL) before drying in vacuo for 16 hours to afford compound **3a** as a pale yellow powder (0.220 g, 0.181 mmol, 40% yield). Crystals suitable for X-ray diffractometry were grown by vapour diffusion of *n*-hexane into a CH<sub>2</sub>Cl<sub>2</sub> solution of the compound at 5 °C. Note: Spectra (*vide infra*) indicate a minor rotamer in a 1:4 ratio. Data presented are of the major component. IR (CH<sub>2</sub>Cl<sub>2</sub>, cm<sup>-1</sup>): 2196 s ν<sub>CN</sub>, 1943 vs ν<sub>CO</sub>, 1852 vs ν<sub>CO</sub>. IR (ATR, cm<sup>-1</sup>): 2552 2532 w ν<sub>BH</sub>, 2184 s ν<sub>CN</sub>, 1939 vs ν<sub>CO</sub>, 1846 vs ν<sub>CO</sub>. <sup>1</sup>H NMR (400 MHz, CDCl<sub>3</sub>, 25 °C): δ<sub>H</sub> = 7.49 [br, 6 H, C<sub>6</sub>H<sub>5</sub>], 7.25–7.17 [m, 4 H, C<sub>6</sub>H<sub>5</sub>], 7.12 [d, <sup>1</sup>J<sub>HH</sub> = 8 Hz, C<sub>6</sub>H<sub>3</sub>], 7.03 [br, 5 H, C<sub>6</sub>H<sub>5</sub>], 5.64 [s, 1 H, pzCH], 5.62 [s, 2 H, pzCH], 2.71 [s, 6 H, XylCH<sub>3</sub>], 2.40 [s, 6 H, pzCH<sub>3</sub>], 2.37 [s, 6 H, pzCH<sub>3</sub>], 2.31 [s, 3 H, pzCH<sub>3</sub>], 2.25 [s, 3 H, pzCH<sub>3</sub>]. <sup>13</sup>C{<sup>1</sup>H} NMR (151 MHz, CDCl<sub>3</sub>, 25 °C): δ<sub>C</sub> = 308.4 [d, <sup>2</sup>J<sub>CP</sub> = 10 Hz, W≡C–Pt], 227.5 [<sup>1</sup>J<sub>CW</sub> = 175 Hz, CO], 152.0, 151.3 [C<sup>5</sup>(pz)], 144.3, 143.3 [C<sup>3</sup>(pz)], 136.9 [C<sup>2,6</sup>(C<sub>6</sub>H<sub>3</sub>)], 135.1 [d, <sup>2</sup>J<sub>CP</sub> = 11 Hz, C<sup>2,6</sup>(C<sub>6</sub>H<sub>5</sub>)], 130.6 [C<sup>4</sup>(C<sub>6</sub>H<sub>5</sub>)], 129.4 [C<sup>4</sup>(C<sub>6</sub>H<sub>3</sub>)], 129.2 [d, <sup>1</sup>J<sub>CP</sub> = 59 Hz, C<sup>1</sup>(C<sub>6</sub>H<sub>5</sub>)], 128.1 [C<sup>3,5</sup>(C<sub>6</sub>H<sub>3</sub>)], 127.7 [d, <sup>2</sup>J<sub>CP</sub> = 11 Hz, C<sup>3,5</sup>(C<sub>6</sub>H<sub>5</sub>)], 126.4 [PtCN], 106.6, 106.2 [C<sup>4</sup>(pz)], 19.8 [XylCH<sub>3</sub>], 16.7, 15.2, 12.8, 12.6 [pzCH<sub>3</sub>]. <sup>31</sup>P{<sup>1</sup>H} NMR (162 MHz, CDCl<sub>3</sub>, 25 °C): δ<sub>P</sub> = 16.75 [s, <sup>1</sup>J<sub>PPT</sub> = 3466 Hz]. <sup>195</sup>Pt{<sup>1</sup>H} NMR (85.7 MHz, CDCl<sub>3</sub>, 25 °C): δ<sub>Pt</sub> = –3761 [d.br., <sup>1</sup>J<sub>PtP</sub> = 3489 Hz]. MS (ESI, +ve ion, *m/z*): Found: 1216.1874. Calcd for C<sub>45</sub>H<sub>46</sub><sup>11</sup>B<sup>79</sup>BrN<sub>7</sub>O<sub>2</sub>P<sup>195</sup>Pt<sup>184</sup>W [M]<sup>+</sup>: 1216.1884. Anal. Found: C, 44.39; H, 3.92; N, 8.07%. Calcd for C<sub>45</sub>H<sub>46</sub>BBrN<sub>7</sub>O<sub>2</sub>P<sub>2</sub>PtW: C, 44.39; H, 3.81; N, 8.05%. *Crystal data for* C<sub>45</sub>H<sub>46</sub>BBrN<sub>7</sub>O<sub>2</sub>P<sub>2</sub>PtW·CH<sub>2</sub>Cl<sub>2</sub>, *M*<sub>w</sub> = 1302.44, triclinic, *P* $\bar{1}$  (No. 2), *a* = 9.4191 (2) Å, *b* = 15.8501 (2) Å, *c* = 16.1962 (4) Å, α = 88.182 (2)°, β = 77.516 (2)°, γ = 82.340 (2)°, *V* = 2339.74 (10) Å<sup>3</sup>, *Z* = 2, ρ<sub>calc</sub> = 1.849 Mgm<sup>-3</sup>, μ(Cu Kα) = 12.73 mm<sup>-1</sup>, *T* = 150(0) K, light orange plate, 0.18 × 0.06 × 0.04 mm, 8849 independent measured reflections (θ<sub>max</sub> = 73.7), *R*<sub>1</sub> = 0.042, *wR*<sub>2</sub> = 0.112 for 7651 reflections [*I* > 2σ(*I*)], 571 parameters, 9 restraints. CDCC 2084969.

#### Synthesis of [WPt(μ<sub>2</sub>-C)Br(CNC<sub>6</sub>H<sub>2</sub>Me<sub>3</sub>)(CO)<sub>2</sub>(PPh<sub>3</sub>)(Tp\*)] (**3b**)

A sample of [WPt(μ-C)Br(CO)<sub>2</sub>(PPh<sub>3</sub>)<sub>2</sub>(Tp\*)] (**1**: 0.181 g, 0.134 mmol) and 2,4,6-trimethylphenylisonitrile (0.029 g, 0.199 mmol) was stirred in toluene (10 mL) for 16 hours at ambient temperature. The subsequent orange suspension had solvent removed *via* rotary evaporation where the residue was sonicated in *n*-hexane (5 x 10 mL), decanted each time to remove excess phosphine. Now free of excess phosphine, flash column chromatography {silica gel, N<sub>2</sub>, dry loaded, isocratic elution, 75% CH<sub>2</sub>Cl<sub>2</sub>/petroleum ether 60–80} first eluted the product as an orange band, followed by a minor band returning starting material **1** and [WPt(μ-C)–Br(CO)<sub>2</sub>(CNC<sub>6</sub>H<sub>2</sub>Me<sub>3</sub>)<sub>2</sub>(Tp\*)] (**4b**). The product-containing band was crystallised from CH<sub>2</sub>Cl<sub>2</sub> and EtOH to give an orange solid which was collected *via* vacuum filtration. The solid was washed with EtOH (2 x 5 mL) and *n*-hexane (10 mL) before drying in vacuo to afford compound **3b** as a pale orange powder (0.077 g, 0.063 mmol, 47% yield). Crystals

suitable for X-ray diffractometry were grown by vapour diffusion of *n*-hexane into a CHCl<sub>3</sub> solution of **3b** at 5 °C. Note: Spectra (*vide infra*) indicate the presence of a minor rotamer in a ratio of 1:6 with the major isomer. IR (CH<sub>2</sub>Cl<sub>2</sub>, cm<sup>-1</sup>): 2197 s ν<sub>CN</sub>, 1943 vs ν<sub>CO</sub>, 1852 vs ν<sub>CO</sub>. IR (ATR, cm<sup>-1</sup>): 2544 2529 w ν<sub>BH</sub>, 2180 s ν<sub>CN</sub>, 1931 vs ν<sub>CO</sub>, 1835 vs ν<sub>CO</sub>. <sup>1</sup>H NMR (400 MHz, CDCl<sub>3</sub>, 25 °C): δ<sub>H</sub> = 7.49 [m.br., 6 H, C<sub>6</sub>H<sub>5</sub>], 7.19 [m.br., 3 H, C<sub>6</sub>H<sub>5</sub>], 7.02 [m.br., 6 H, C<sub>6</sub>H<sub>5</sub>], 6.92 [s, 2 H, C<sub>6</sub>H<sub>2</sub>], 5.63 [s, 1 H, pzCH], 5.61 [s, 2 H, pzCH], 2.65 [s, 6 H, MesCH<sub>3</sub>-2,6], 2.40 [s, 6 H, pzCH<sub>3</sub>], 2.36 [s, 6 H, pzCH<sub>3</sub>], 2.30 [overlapping 3 H singlets, MesCH<sub>3</sub>-4 and pzCH<sub>3</sub>], 2.24 [s, 3 H, pzCH<sub>3</sub>]. <sup>13</sup>C{<sup>1</sup>H} NMR (176 MHz, CDCl<sub>3</sub>, 25 °C, δ): 308.6 [m, W≡C–Pt], 227.4 [<sup>1</sup>J<sub>CW</sub> = 175 Hz], 152.0, 151.3 [C<sup>5</sup>(pz)], 144.3, 143.3 [C<sup>3</sup>(pz)], 140.1 [C<sup>4</sup>(C<sub>6</sub>H<sub>2</sub>)], 136.6 [C<sup>2,6</sup>(C<sub>6</sub>H<sub>2</sub>)], 135.1 [d, <sup>2</sup>J<sub>CP</sub> = 11 Hz, C<sup>2,6</sup>(C<sub>6</sub>H<sub>5</sub>)], 130.6 [C<sup>4</sup>(C<sub>6</sub>H<sub>5</sub>)], 129.2 [d, <sup>1</sup>J<sub>CP</sub> = 55 Hz, C<sup>1</sup>(C<sub>6</sub>H<sub>5</sub>)], 128.9 [C<sup>3,5</sup>(C<sub>6</sub>H<sub>2</sub>)], 127.6 [d, <sup>3</sup>J<sub>CP</sub> = 12 Hz, C<sup>3,5</sup>(C<sub>6</sub>H<sub>5</sub>)], 123.8 [PtCN], 106.6 106.2 [C<sup>4</sup>(pz)], 21.5 [MesCH<sub>3</sub>-2,6] 19.7 [MesCH<sub>3</sub>-4], 16.7, 15.3, 12.8, 12.6 [pzCH<sub>3</sub>]. <sup>31</sup>P{<sup>1</sup>H} NMR (162 MHz, CDCl<sub>3</sub>, 25 °C): δ<sub>P</sub> = 15.74 [s, <sup>1</sup>J<sub>PPT</sub> = 3477 Hz]. This spectrum also indicates a minor isomer (ratio 1:7, δ<sub>P</sub> = 16.52) co-existing with the major isomer. <sup>195</sup>Pt{<sup>1</sup>H} NMR (150 MHz, CDCl<sub>3</sub>, 25 °C): δ<sub>Pt</sub> = –3763 [d, <sup>1</sup>J<sub>PtP</sub> = 3473 Hz]. MS (ESI, +ve ion, *m/z*): Found: 1232.2062. Calcd for C<sub>46</sub>H<sub>48</sub><sup>11</sup>B<sup>81</sup>BrN<sub>7</sub>O<sub>2</sub>P<sub>1</sub><sup>195</sup>Pt<sup>184</sup>W [M]<sup>+</sup>: 1232.2020. Anal. Found: C, 44.84; H, 3.97; N, 7.84%. Calcd for C<sub>46</sub>H<sub>48</sub>BBrN<sub>7</sub>O<sub>2</sub>P<sub>2</sub>PtW: C, 44.86; H, 3.93; N, 7.96%. *Crystal data for* C<sub>46</sub>H<sub>48</sub>BBrN<sub>7</sub>O<sub>2</sub>P<sub>2</sub>PtW·CHCl<sub>3</sub>, *M*<sub>w</sub> = 1350.91, triclinic, *P* $\bar{1}$  (No. 2), *a* = 9.5314 (3) Å, *b* = 16.2298 (5) Å, *c* = 16.3030 (5) Å, α = 91.074 (2)°, β = 103.031 (2)°, γ = 93.835 (2), *V* = 2450.02 (13) Å<sup>3</sup>, *Z* = 2, ρ<sub>calc</sub> = 1.831 Mgm<sup>-3</sup>, μ(Cu Kα) = 12.67 mm<sup>-1</sup>, *T* = 150(0) K, light yellow plate, 0.10 × 0.06 × 0.04 mm, 9597 independent measured reflections (θ<sub>max</sub> = 73.5), *R*<sub>1</sub> = 0.033, *wR*<sub>2</sub> = 0.088 for 8386 reflections [*I* > 2σ(*I*)], 590 parameters without restraints. CDCC 2084966.

#### Synthesis of [WPt(μ-C)Br(C<sub>6</sub>H<sub>2</sub>Me<sub>3</sub>)<sub>2</sub>(CO)<sub>2</sub>(Tp\*)] (**4b**).

A sample of [WPt(μ-C)Br(CO)<sub>2</sub>(PPh<sub>3</sub>)<sub>2</sub>(Tp\*)] (**1**: 502 mg, 0.372 mmol) was stirred in benzene (30 mL) with mesitylisocyanide (148 mg, 1.02 mmol). Upon solvent injection an orange suspension was noted. The reaction was stirred for 16 hours at 60 °C during which precipitation of an orange solid occurred to provide a clear supernatant phase. The solvent was removed under reduced pressure to give a pale orange solid. Flash column chromatography (silica gel, N<sub>2</sub>, CH<sub>2</sub>Cl<sub>2</sub>/THF/CHCl<sub>3</sub> gradient) was employed for purification, eluting a major orange band that was freed of volatiles to afford an orange solid. Ultrasonic trituration in Et<sub>2</sub>O (10 mL) allowed for a very fine pale orange powder to form. This was collected by filtration, washed with *n*-hexane (3 x 10 mL) and *n*-pentane (3 x 10 mL) and dried in vacuo to afford the title compound (376 mg, 0.337 mmol, 91% isolated yield). Crystals suitable for X-ray diffractometry were obtained by the slow evaporation of CDCl<sub>3</sub> at ambient temperature. IR (CH<sub>2</sub>Cl<sub>2</sub>, cm<sup>-1</sup>): 2194 vs ν<sub>CN</sub>, 1951 vs ν<sub>CO</sub>, 1859 vs ν<sub>CO</sub>. IR (ATR, cm<sup>-1</sup>): 2536 w ν<sub>BH</sub>, 2190 vs ν<sub>CN</sub>, 1940 vs ν<sub>CO</sub>, 1850 vs ν<sub>CO</sub>. <sup>1</sup>H NMR (400 MHz, CDCl<sub>3</sub>, 25 °C) δ<sub>H</sub> = 7.36 [s, 2 H, C<sub>6</sub>H<sub>2</sub>], 6.85 [s, 4 H, C<sub>6</sub>H<sub>2</sub>], 5.76 [s, 2 H, pzCH], 5.69 [s, 1 H, pzCH], 2.81 [s, 6

## SUPPORTING INFORMATION

H, MesCH<sub>3</sub>], 2.35 [s, 6 H, pzCH<sub>3</sub>], 2.33 [s, 3 H, pzCH<sub>3</sub>], 2.29 [s, 3 H, pzCH<sub>3</sub>], 2.28 [s, 6 H, pzCH<sub>3</sub>], 2.15 [s, 12 H, MesCH<sub>3</sub>]. <sup>13</sup>C{<sup>1</sup>H} NMR (151 MHz, CDCl<sub>3</sub>, 25°C): δ<sub>c</sub> = 299.3 [W≡C–Pt], 226.7 [<sup>2</sup>J<sub>CW</sub> = 174 Hz, CO], 152.1 151.7 [C<sup>5</sup>(pz)], 144.8 143.7 [C<sup>3</sup>(pz)], 140.7 [C<sup>4</sup>(C<sub>6</sub>H<sub>5</sub>)], 136.5 [C<sup>2,6</sup>(C<sub>6</sub>H<sub>5</sub>)], 128.8 [C<sup>3,5</sup>(C<sub>6</sub>H<sub>5</sub>)], 128.5 [C<sup>1</sup>(C<sub>6</sub>H<sub>5</sub>)], 122.8 [PtCN], 106.3 106.2 [C<sup>4</sup>(pz)], 21.5 18.1 [MesCH<sub>3</sub>], 17.1 15.3 12.8 12.7 [pzCH<sub>3</sub>]. <sup>195</sup>Pt{<sup>1</sup>H} NMR (85.7 MHz, CDCl<sub>3</sub>, 25°C): δ<sub>Pt</sub> = –3656 [s.br.]. MS (ESI, +ve ion, *m/z*): Found: 1114.20745. Calcd for C<sub>38</sub>H<sub>45</sub><sup>11</sup>B<sup>79</sup>BrN<sub>8</sub>O<sub>2</sub><sup>195</sup>Pt<sup>184</sup>W [M+H]<sup>+</sup>: 1114.20883. Anal. Found: C, 41.00; H, 3.82; N, 9.94%. Calcd for C<sub>38</sub>H<sub>44</sub>BBrN<sub>8</sub>O<sub>2</sub>PtW: C, 40.95; H, 3.98; N, 10.05%. *Crystal data for C<sub>38</sub>H<sub>45</sub>BBrN<sub>8</sub>O<sub>2</sub>PtW*, *M<sub>w</sub>* = 1258.87, monoclinic, *I2/a*, *a* = 20.9197 (3) Å, *b* = 13.80583 (17) Å, *c* = 34.4091 (6) Å, β = 90.7607 (14)°, *V* = 9936.9 (4) Å<sup>3</sup>, *Z* = 8, ρ<sub>calc</sub> = 1.683 Mgm<sup>-3</sup>, μ(Mo Kα) = 12.15 mm<sup>-1</sup>, *T* = 150(0) K, light orange block, 9812 independent measured reflections (θ<sub>max</sub> = 73.0°), *R*<sub>1</sub> = 0.034, *wR*<sub>2</sub> = 0.087 for 8154 reflections [*I* > 2σ(*I*)], 481 parameters without restraints. CDCC 2084968.

### Synthesis of [WPt(μ<sub>2</sub>-CCNC<sub>6</sub>H<sub>5</sub>Me<sub>2</sub>)(CO)<sub>2</sub>(PPh<sub>3</sub>)<sub>2</sub>(CO)<sub>2</sub>(Tp\*)]-[BPh<sub>4</sub>] ([5a]BPh<sub>4</sub>)

A solvent mixture of 1:5 MeOH/CH<sub>2</sub>Cl<sub>2</sub> (15 mL) was injected to a flask charged with solid [WPt(μ-C)-Br(CNXyl)(CO)<sub>2</sub>(PPh<sub>3</sub>)(Tp\*)] (**3a**: 0.102 g, 0.0838 mmol), triphenylphosphine (0.026 g, 0.099 mmol) and Na[BPh<sub>4</sub>] (0.032 g, 0.094 mmol). With rapid stirring, this immediately turned from an orange to a pink/maroon coloured solution. This was stirred for 20 hours after which the solvent was removed. The resulting purple residue was chromatographed through a short silica gel column eluting with CH<sub>2</sub>Cl<sub>2</sub> to remove excess NaBPh<sub>4</sub>. This purple eluate was freed of volatiles and the residue was then purified by flash column chromatography {silica gel, N<sub>2</sub>, isocratic elution, neat CH<sub>2</sub>Cl<sub>2</sub>} eluting a major purple band, where 5 fractions of 40 mL were sampled across the band. Samples of each fraction were tested by <sup>1</sup>H NMR spectroscopy determining that fraction 1 was pure, fractions 2–4 could be purified by crystallisation and fraction 5 was an unidentified compound of similar colour and polarity. Crystallisation of relevant fractions was performed by the concentration of CH<sub>2</sub>Cl<sub>2</sub> into EtOH by rotary evaporation. When solids began emerging, the flash was sonicated to encourage more precipitation before concentrating further. This resulting precipitate was collected via vacuum filtration to give a pastel purple powder and a pink/red supernatant after careful washing with EtOH (2 x 5 mL) and *n*-hexane (2 x 10 mL). The powders were dried *in vacuo* for 16 hours to afford compound [5a][BPh<sub>4</sub>] as a purple powder (0.080 g total, 0.047 mmol total, 56% isolated yield). Crystals of a chloroform solvate suitable for X-ray diffractometry were grown by the vapour diffusion of *n*-hexane into a solution of [5a][BPh<sub>4</sub>] in CHCl<sub>3</sub> at 5 °C. IR (CH<sub>2</sub>Cl<sub>2</sub>, cm<sup>-1</sup>): 2104 s ν<sub>CN</sub>, 1944 vs ν<sub>CO</sub>, 1853 vs ν<sub>CO</sub>. IR (ATR, cm<sup>-1</sup>): 2556 w ν<sub>BH</sub>, 2094 s ν<sub>CN</sub>, 1936 vs ν<sub>CO</sub>, 1855 vs ν<sub>CO</sub>. UV-Vis [1.95(2) x 10<sup>-5</sup> mol·L<sup>-1</sup>, nm(ε), CH<sub>2</sub>Cl<sub>2</sub>]: 268 (36100), 276 (36000), 292 (36200), 365 (14000), 535 (6900). <sup>1</sup>H NMR (400 MHz, CDCl<sub>3</sub>, 25°C): δ<sub>H</sub> = 7.73 [m, 5

H, C<sub>6</sub>H<sub>5</sub>], 7.49 [m, 8 H, C<sub>6</sub>H<sub>5</sub>], 7.42 [m, 4 H, C<sub>6</sub>H<sub>5</sub>], 7.30 [m, 8 H, C<sub>6</sub>H<sub>5</sub>], 7.21 [m, 9 H, C<sub>6</sub>H<sub>5</sub>], 7.07 [m, 14 H, C<sub>6</sub>H<sub>5</sub>], 6.92 [m, 4 H, C<sub>6</sub>H<sub>5</sub>], 6.78 6.76 [d, <sup>1</sup>J<sub>HH</sub> = 7 Hz, 2 H, H<sup>3,5</sup>(C<sub>6</sub>H<sub>5</sub>)], 5.87 [s, 2 H, pzCH], 5.81 [s, 1 H, pzCH], 2.51 [s, 6 H, pzCH<sub>3</sub>], 2.37 [s, 3 H, pzCH<sub>3</sub>], 2.24 [s, 6 H, pzCH<sub>3</sub>], 1.76 [s, 3 H, pzCH<sub>3</sub>], 0.95 [s, 6 H, XylCH<sub>3</sub>]. <sup>13</sup>C{<sup>1</sup>H} NMR (151 MHz, CDCl<sub>3</sub>, 25°C): δ<sub>c</sub> = 226.5 [d, <sup>2</sup>J<sub>CP</sub> = 6, <sup>2</sup>J<sub>CPT</sub> = 48, <sup>2</sup>J<sub>CW</sub> = 158 Hz, CO], 222.8 [dd, <sup>2</sup>J<sub>CP</sub> = 73, 7 Hz, WPt(μ-CCN)], 164.5 [quart. + hept., <sup>1</sup>J<sub>C-11B</sub> = 49.7, <sup>1</sup>J<sub>C-10B</sub> = 17 Hz, γ(<sup>11</sup>B)/γ(<sup>10</sup>B) = 2.99, C<sup>1</sup>(BC<sub>6</sub>H<sub>5</sub>)], 156.1, 151.2 [C<sup>5</sup>(pz)], 147.3, 145.2 [C<sup>3</sup>(pz)], 139.1 [t, <sup>3</sup>J<sub>CP</sub> = 9, <sup>2</sup>J<sub>CPT</sub> = 111 Hz, WPt(μ-CCN)], 136.5 [C<sup>2,6</sup>(BC<sub>6</sub>H<sub>5</sub>)], 135.1, 134.5 [d, <sup>2</sup>J<sub>CP</sub> = 12 Hz, C<sup>2,6</sup>(C<sub>6</sub>H<sub>5</sub>)], 133.3 [d, <sup>1</sup>J<sub>CP</sub> = 49 Hz, C<sup>1</sup>(C<sub>6</sub>H<sub>5</sub>)], 132.9 [C<sup>2</sup>(C<sub>6</sub>H<sub>5</sub>)], 132.3 [d, <sup>1</sup>J<sub>CP</sub> = 50 Hz, C<sup>1</sup>(PC<sub>6</sub>H<sub>5</sub>)], 131.0, 130.8 [C<sup>4</sup>(C<sub>6</sub>H<sub>5</sub>)], 129.7 [C<sup>4</sup>(C<sub>6</sub>H<sub>5</sub>)], 128.5 [d, <sup>3</sup>J<sub>CP</sub> = 10 Hz, C<sup>3,5</sup>(C<sub>6</sub>H<sub>5</sub>)], 128.4 [C<sup>3,5</sup>(C<sub>6</sub>H<sub>5</sub>)], 128.2 [d, <sup>3</sup>J = 10 Hz, C<sup>3,5</sup>(C<sub>6</sub>H<sub>5</sub>)], 127.2 [C<sup>1</sup>(C<sub>6</sub>H<sub>5</sub>)], 125.6 [m, C<sup>3,5</sup>(BC<sub>6</sub>H<sub>5</sub>)], 121.6 [C<sup>4</sup>(BC<sub>6</sub>H<sub>5</sub>)], 108.6, 107.7 [C<sup>4</sup>(pz)], 17.4 [pzCH<sub>3</sub>], 17.0 [XylCH<sub>3</sub>], 16.0, 13.2, 12.7 [pzCH<sub>3</sub>]. <sup>31</sup>P{<sup>1</sup>H} NMR (162 MHz, CDCl<sub>3</sub>, 25°C): δ<sub>P</sub> = 44.46 [d, <sup>2</sup>J<sub>PP</sub> = 20, <sup>1</sup>J<sub>PPT</sub> = 3772 Hz], 25.60 [d, <sup>2</sup>J<sub>PP</sub> = 20, <sup>1</sup>J<sub>PPT</sub> = 3440 Hz]. <sup>195</sup>Pt{<sup>1</sup>H} NMR (149.9 MHz, CDCl<sub>3</sub>, 25°C): δ<sub>Pt</sub> = –4174 [dd, <sup>1</sup>J<sub>PtP</sub> = 3766, 3448 Hz]. MS (ESI, *m/z*): Found: 1399.3612. Calcd for C<sub>63</sub>H<sub>61</sub><sup>11</sup>BN<sub>7</sub>O<sub>2</sub>P<sub>2</sub><sup>195</sup>Pt<sup>184</sup>W [M]<sup>+</sup>: 1399.3662. Anal. Found: C, 60.77; H, 4.63; N, 5.73%. Calcd for C<sub>67</sub>H<sub>81</sub>B<sub>2</sub>N<sub>7</sub>O<sub>2</sub>P<sub>2</sub>PtW: C, 60.78; H, 4.75; N, 5.70%. Calcd for C<sub>67</sub>H<sub>81</sub>B<sub>2</sub>N<sub>7</sub>O<sub>2</sub>P<sub>2</sub>PtW·2CHCl<sub>3</sub>: C, 54.60; H, 4.27; N, 5.01%.

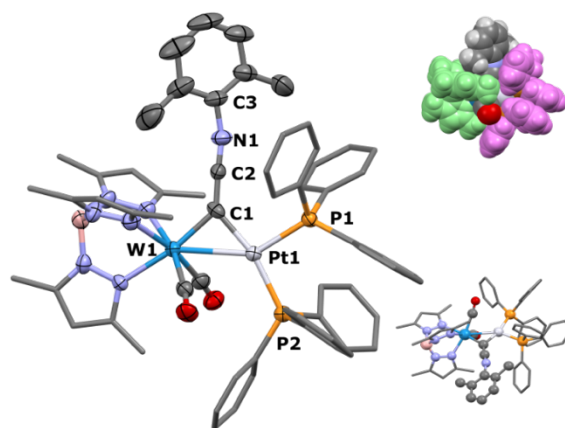

**Figure S1.** Molecular structure of [5a]<sup>+</sup> in a crystal of [5a].BPh<sub>4</sub>.2CHCl<sub>3</sub> (50% displacement ellipsoids, pyrazolyl and aryl rings simplified, solvent and borate anion excluded). Selected bond lengths (Å) and angles (°): W1–C1 2.024(6), Pt1–C1 1.982(7), C1–C2 1.34(1), C2–N1 1.18(1), N1–C3 1.39(1), Pt1–P1 2.298(1), Pt1–P2 2.310(2), W1–C1–Pt1 88.0(3), C1–Pt1–W1 46.6(2), Pt1–W1–C1 45.4(2), C3–N1–C2 162.2(8), P1–Pt1–P2 96.55(6). Inserts: a) space-filling representation with Tp\* in green and phenyl rings in pink, b) ball and stick model showing bending at nitrogen.

*Crystal data for C<sub>63</sub>H<sub>61</sub>BN<sub>7</sub>O<sub>2</sub>P<sub>2</sub>PtW·2(CHCl<sub>3</sub>)·C<sub>24</sub>H<sub>20</sub>B*, *M<sub>w</sub>* = 1957.82, monoclinic, *P2<sub>1</sub>/c* (No. 14), *a* = 20.9875 (3) Å, *b* = 15.7357 (2) Å, *c* = 26.1799 (5) Å, β = 105.436 (2)°, *V* = 8334.1 (2) Å<sup>3</sup>, *Z* = 4, ρ<sub>calc</sub> = 1.560 Mgm<sup>-3</sup>, μ(Cu Kα) = 8.15 mm<sup>-1</sup>, *T* = 150(0) K, light red plate, 0.11 × 0.04 × 0.03 mm, 16087 independent measured reflections (θ<sub>max</sub> = 72.8°), *R*<sub>1</sub> = 0.047, *wR*<sub>2</sub> = 0.128 for 12305 reflections [*I* > 2σ(*I*)], 1003 parameters. CDCC 2084967. The cationic complex was also crystallised as a chloroform solvate with a PF<sub>6</sub><sup>-</sup> counter-anion. *Crystal data for C<sub>63</sub>H<sub>61</sub>BN<sub>7</sub>O<sub>2</sub>P<sub>2</sub>PtW·(CHCl<sub>3</sub>)·PF<sub>6</sub>*, *M<sub>w</sub>* = 1664.21, triclinic, *P1̄* (no. 2), *a* = 11.8143 (3) Å, *b* = 14.7029 (4) Å, *c* = 22.6429 (8) Å, α = 100.170 (3)°, β = 103.965 (3)°, γ = 107.433 (2)°, *V* = 3507.58 (19) Å<sup>3</sup>, *Z* = 2,

## SUPPORTING INFORMATION

$\rho_{\text{calc}} = 1.576 \text{ Mg m}^{-3}$ ,  $\mu(\text{Mo } K\alpha) = 3.88 \text{ mm}^{-1}$ ,  $T = 150(0) \text{ K}$ , purple block,  $0.23 \times 0.13 \times 0.04 \text{ mm}$ , 19658 independent measured reflections ( $\theta_{\text{max}} = 32.2^\circ$ ),  $R_1 = 0.044$ ,  $wR_2 = 0.103$  for 15114 reflections [ $I > 2\sigma(I)$ ], 805 parameters without restraints. CDCC 2085626.

### Synthesis of [WPt( $\mu_2$ -CCNC<sub>6</sub>H<sub>2</sub>Me<sub>3</sub>)(CNC<sub>6</sub>H<sub>2</sub>Me<sub>3</sub>)(CO)<sub>2</sub>(PPh<sub>3</sub>) - (Tp\*)][PF<sub>6</sub>] ([5b]PF<sub>6</sub>)

A mixture of [WPt( $\mu$ -C)Br(CNC<sub>6</sub>H<sub>2</sub>Me<sub>3</sub>)-(CO)<sub>2</sub>(PPh<sub>3</sub>)(Tp\*)] (**4b**: 0.178 g, 0.159 mmol), triphenylphosphine (56 mg, 0.21 mmol) and NaPF<sub>6</sub> (46 mg, 0.27 mmol) was dissolved in a mixture of MeOH and CH<sub>2</sub>Cl<sub>2</sub> (15 mL, 1:5 v/v)—the colour immediately changed from orange to green and then slowly to a deep purple colour while stirring overnight. The solvent was removed to give a dark solid which was subjected to flash column chromatography {silica gel, N<sub>2</sub>, isocratic elution, 2% THF/CH<sub>2</sub>Cl<sub>2</sub>} to provide a major purple band that was freed of volatiles under reduced pressure. Crystallisation of relevant fractions was performed by the concentration of CH<sub>2</sub>Cl<sub>2</sub> into EtOH by rotary evaporation. When solids began emerging, the suspension was sonicated to encourage more precipitation before concentrating further. This resulting precipitate was collected via vacuum filtration to give a purple powder and a pink/red supernatant after careful washing with EtOH (2 x 5 mL) and *n*-hexane (2 x 10 mL) before drying *in vacuo* to give the title salt as a deep purple powder (77 mg, 0.053 mmol, 41% isolated yield). Single crystals suitable for conventional or synchrotron X-ray diffraction were not successfully acquired. IR (CH<sub>2</sub>Cl<sub>2</sub>, cm<sup>-1</sup>): 2558 w  $\nu_{\text{BH}}$ , 2156\* vs  $\nu_{\text{CN}}$ , 2115\* vs  $\nu_{\text{CN}}$ , 1943 vs  $\nu_{\text{CO}}$ , 1862 vs  $\nu_{\text{CO}}$ . IR (ATR, cm<sup>-1</sup>): 2553 w  $\nu_{\text{BH}}$ , 2119 br vs  $\nu_{\text{CN}}$ , 1933 vs  $\nu_{\text{CO}}$ , 1844 vs  $\nu_{\text{CO}}$ . \*Computational analysis and spectra simulation indicates that the two CN stretches for the iminoketenylidene and Pt-isonitrile are strongly coupled rather than independent. UV-Vis [2.11(6) x 10<sup>-5</sup> mol L<sup>-1</sup>, nm( $\epsilon$ ), CH<sub>2</sub>Cl<sub>2</sub>]: 263 (35000), 320 (30300), 347 sh (17700), 550 (6800). <sup>1</sup>H NMR (400 MHz, CDCl<sub>3</sub>, 25°C):  $\delta_{\text{H}} = 7.58$  [m, 6 H, C<sub>6</sub>H<sub>5</sub>], 7.36 [m, 9 H, C<sub>6</sub>H<sub>5</sub>], 7.17 [m, 2 H, C<sub>6</sub>H<sub>5</sub>], 6.90 [s, 2 H, C<sub>6</sub>H<sub>2</sub>], 6.67 [s, 2 H, C<sub>6</sub>H<sub>2</sub>], 5.95 [s, 1 H, pzCH], 5.91 [s, 2 H, pzCH], 2.62 [s, 3 H, pzCH<sub>3</sub>], 2.55 [s, 6 H, pzCH<sub>3</sub>], 2.41 [s, 3 H, pzCH<sub>3</sub>], 2.33 [s, 3 H, MesCH<sub>3</sub>], 2.15 [s, 6 H, MesCH<sub>3</sub>], 2.11 [s, 3 H, MesCH<sub>3</sub>], 1.02 [s, 6 H, MesCH<sub>3</sub>]. <sup>13</sup>C{<sup>1</sup>H} NMR (151 MHz, CDCl<sub>3</sub>, 25°C):  $\delta_{\text{C}} = 229.0$ , 228.9 [s x 2, CO], 217.9 [d, <sup>2</sup>J<sub>CP</sub> = 6 Hz, WPt( $\mu$ -CCN)], 156.2, 151.2 [C<sup>5</sup>(pz)], 147.4, 145.4 [C<sup>3</sup>(pz)], 141.3 [C<sup>1</sup>(C<sub>6</sub>H<sub>2</sub>)], 139.7 [C<sup>1</sup>(C<sub>6</sub>H<sub>2</sub>)], 134.8 [C<sup>4</sup>(C<sub>6</sub>H<sub>2</sub>)], 134.0 [d, <sup>2</sup>J<sub>CP</sub> = 12 Hz, C<sup>2,6</sup>(C<sub>6</sub>H<sub>5</sub>)], 133.8 [C<sup>4</sup>(C<sub>6</sub>H<sub>2</sub>)], 132.3 [d, <sup>1</sup>J<sub>CP</sub> = 53 Hz, C<sup>1</sup>(C<sub>6</sub>H<sub>5</sub>)], 131.7 [C<sup>4</sup>(C<sub>6</sub>H<sub>5</sub>)], 129.0 [d, <sup>3</sup>J<sub>CP</sub> = 11 Hz, C<sup>3,5</sup>(C<sub>6</sub>H<sub>5</sub>)], 129.5 [C<sup>3,5</sup>(C<sub>6</sub>H<sub>2</sub>)], 128.8 [C<sup>3,5</sup>(C<sub>6</sub>H<sub>2</sub>)], 124.3 WPt( $\mu$ -CCN)], 125.4 [C<sup>1</sup>(C<sub>6</sub>H<sub>2</sub>)], 122.8 [C<sup>1</sup>(C<sub>6</sub>H<sub>2</sub>)], 122.8 [PtCNMe<sub>s</sub>], 109.3, 107.8 [C<sup>4</sup>(pz)], 21.6, 21.4 [MesCH<sub>3</sub>], 18.5, 17.8 [MesCH<sub>3</sub>], 16.9, 16.1, 13.2, 12.7 [pzCH<sub>3</sub>]. <sup>31</sup>P{<sup>1</sup>H} NMR (162 MHz, CDCl<sub>3</sub>, 25°C):  $\delta_{\text{P}} = 44.14$  [s, <sup>1</sup>J<sub>PPt</sub> = 3575 Hz]. <sup>195</sup>Pt{<sup>1</sup>H} NMR (150 MHz, CDCl<sub>3</sub>, 25°C)  $\delta_{\text{Pt}} = -4136$  [d, <sup>1</sup>J<sub>PPt</sub> = 3587 Hz]. MS (ESI, +ve ion, *m/z*): Found: 1296.3772. Calcd for C<sub>56</sub>H<sub>59</sub><sup>11</sup>BN<sub>8</sub>O<sub>2</sub>P<sup>195</sup>Pt<sup>184</sup>W [M]<sup>+</sup>: 1296.3749. Anal. Found: C, 47.60; H, 4.29; N, 7.32%. Calcd for C<sub>55</sub>H<sub>59</sub>BF<sub>6</sub>N<sub>8</sub>O<sub>2</sub>P<sub>2</sub>PtW.  $\frac{1}{2}$ C<sub>6</sub>H<sub>14</sub>: C, 47.30; H, 4.52; N, 7.61%.

## Optimised Geometries and Cartesian Coordinates

### (a) Singlet CCNMe **6<sub>s</sub>Me**

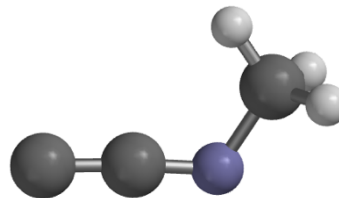

Figure S2. Optimised geometry for singlet CCNMe **6<sub>s</sub>Me**

#### Cartesian Coordinates

| Atom | x         | y         | z         |
|------|-----------|-----------|-----------|
| C    | -1.048745 | 0.000000  | 2.455875  |
| C    | -0.909958 | 0.000000  | 1.147402  |
| N    | -0.846198 | 0.000000  | -0.097344 |
| C    | 0.468421  | 0.000000  | -0.731103 |
| H    | 1.299307  | 0.000000  | -0.016034 |
| H    | 0.518586  | 0.882244  | -1.379398 |
| H    | 0.518586  | -0.882244 | -1.379398 |

**Thermodynamic properties (298.15 K; RI-MP2/cc-PVT $\zeta$ ):**  
 $ZPE = 129.67 \text{ kJ mol}^{-1}$ ,  $H^\circ = -170.247660 \text{ au}$ ,  $S^\circ = 283.96 \text{ J mol}^{-1} \text{ K}^{-1}$ ,  $G^\circ = -170.279907 \text{ au}$ ,  $C_v = 57.58 \text{ J mol}^{-1} \text{ K}^{-1}$ .

### (b) Triplet CCNMe **6<sub>t</sub>Me**

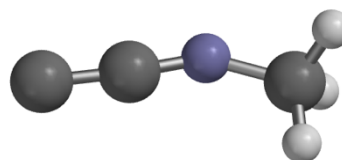

Figure S3. Optimised geometry for triplet CCNMe **6<sub>t</sub>Me**

#### Cartesian Coordinates (See attached .mol2 file)

| Atom | x         | y         | z         |
|------|-----------|-----------|-----------|
| C    | -1.736731 | 0.792608  | 2.200168  |
| C    | -1.033154 | 0.294967  | 1.168965  |
| N    | -0.463593 | -0.228505 | 0.237316  |
| C    | 0.602453  | -0.215781 | -0.716319 |
| H    | 1.567595  | -0.215816 | -0.196424 |
| H    | 0.528651  | 0.678502  | -1.346127 |
| H    | 0.534779  | -1.105975 | -1.347579 |

**Thermodynamic properties (298.15 K, RIMP2/cc-PVT $\zeta$ ):**  
 $ZPE = 124.18 \text{ kJ mol}^{-1}$ ,  $H^\circ = -170.244791 \text{ au}$ ,  $S^\circ = 253.24 \text{ J mol}^{-1} \text{ K}^{-1}$ ,  $G^\circ = -170.273548 \text{ au}$ ,  $C_v = 100.53 \text{ J mol}^{-1} \text{ K}^{-1}$ .  
 $G^\circ(\text{triplet}) - G^\circ(\text{singlet}) = -0.006359 \text{ au}$  (4.0 kcal mol<sup>-1</sup>)

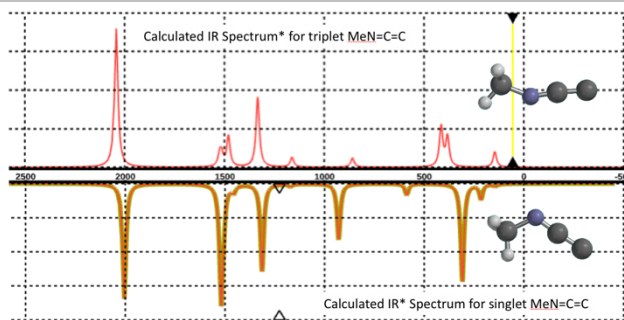

Figure S4. Calculated ( $\omega$ BP97X-V/6-31G\*) Infrared Spectra for singlet ( $6_s$ Me orange) and triplet ( $6_t$ Me red) CCNMe.

(c) Singlet CCNPh  $6_sPh$

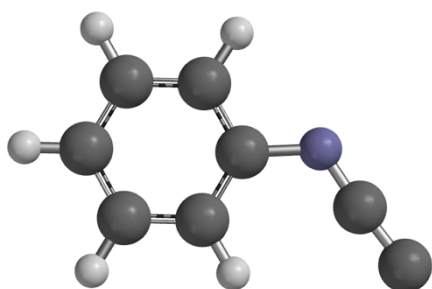

Figure S5. Optimised geometry for singlet CCNPh  $6_sPh$

Cartesian Coordinates

| Atom | x         | y        | z         |
|------|-----------|----------|-----------|
| C    | 0.212263  | 0.000000 | -4.132084 |
| C    | -0.423417 | 0.000000 | -2.989801 |
| N    | -1.107658 | 0.000000 | -1.935170 |
| C    | -0.490447 | 0.000000 | -0.667679 |
| C    | 0.558110  | 0.000000 | 1.904461  |
| C    | 0.902610  | 0.000000 | -0.486217 |
| C    | -1.353174 | 0.000000 | 0.435786  |
| C    | -0.825904 | 0.000000 | 1.723813  |
| C    | 1.420632  | 0.000000 | 0.801518  |
| H    | 1.553186  | 0.000000 | -1.359170 |
| H    | -2.425438 | 0.000000 | 0.254935  |
| H    | -1.490117 | 0.000000 | 2.585033  |
| H    | 2.497832  | 0.000000 | 0.953291  |
| H    | 0.971523  | 0.000000 | 2.911284  |

Thermodynamic properties (298.15 K, RIMP2/cc-PVT $\zeta$ ):

ZPE = 266.41 kJmol<sup>-1</sup>,  $H^\circ = -361.531325$  au,  $S^\circ = 342.75$  Jmol<sup>-1</sup>K<sup>-1</sup>,  $G^\circ = -361.570247$ ,  $C_v = 113.21$  Jmol<sup>-1</sup>K<sup>-1</sup>.

(d) Triplet CCNPh  $6_tPh$

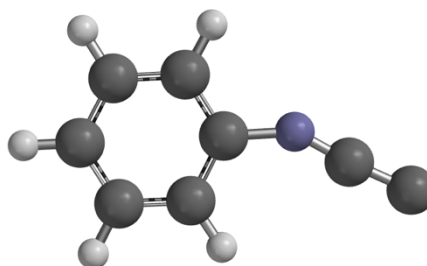

Figure S6. Optimised geometry for triplet CCNPh  $6_tPh$

Cartesian Coordinates (See attached .mol2 file)

| Atom | x         | y        | z         |
|------|-----------|----------|-----------|
| C    | -0.362273 | 0.000000 | -4.471052 |
| C    | -0.550812 | 0.000000 | -3.148668 |
| N    | -0.821909 | 0.000000 | -1.959963 |
| C    | -0.361862 | 0.000000 | -0.654610 |
| C    | 0.533603  | 0.000000 | 1.979583  |
| C    | 1.017133  | 0.000000 | -0.390503 |
| C    | -1.291601 | 0.000000 | 0.393424  |
| C    | -0.836024 | 0.000000 | 1.707877  |
| C    | 1.454964  | 0.000000 | 0.929198  |
| H    | 1.720398  | 0.000000 | -1.220283 |
| H    | -2.353707 | 0.000000 | 0.161608  |
| H    | -1.554238 | 0.000000 | 2.524913  |
| H    | 2.522538  | 0.000000 | 1.138971  |
| H    | 0.883790  | 0.000000 | 3.009505  |

Thermodynamic properties (298.15 K, RIMP2/cc-PVT $\zeta$ ):

ZPE = 269.98 kJmol<sup>-1</sup>,  $H^\circ = -361.514664$  au,  $S^\circ = 358.72$  Jmol<sup>-1</sup>K<sup>-1</sup>,  $G^\circ = -361.555400$  au,  $C_v = 113.35$  Jmol<sup>-1</sup>K<sup>-1</sup>.

$G^\circ(\text{triplet}) - G^\circ(\text{singlet}) = -0.014847$  au ( $-9.32$  kcalmol<sup>-1</sup>)

(e) Singlet CCNH  $6_sH$

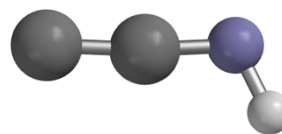

Figure S7. Optimised geometry for singlet CCNH  $6_sH$

Cartesian Coordinates

| Atom | x         | y        | z         |
|------|-----------|----------|-----------|
| C    | -0.350111 | 0.000000 | 1.703366  |
| C    | -0.215657 | 0.000000 | 0.386969  |
| N    | -0.196732 | 0.000000 | -0.858987 |
| H    | 0.762500  | 0.000000 | -1.231349 |

Thermodynamic properties (298.15 K, RIMP2/cc-PVT $\zeta$ ):

ZPE = 87.55 kJmol<sup>-1</sup>,  $H^\circ = -131.046297$  au,  $S^\circ = 233.85$  Jmol<sup>-1</sup>K<sup>-1</sup>,  $G^\circ = -131.072853$  au,  $C_v = 49.89$  Jmol<sup>-1</sup>K<sup>-1</sup>.

# SUPPORTING INFORMATION

## (f) Triplet CCNH 6*t*H

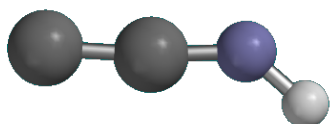

Figure S8. Optimised geometry for triplet CCNMe 6*t*H

### Cartesian Coordinates

| Atom | x         | y        | z         |
|------|-----------|----------|-----------|
| C    | -0.450542 | 0.000000 | 1.759545  |
| C    | -0.187004 | 0.000000 | 0.440261  |
| N    | -0.063136 | 0.000000 | -0.770151 |
| H    | 0.700682  | 0.000000 | -1.429656 |

### Thermodynamic properties (298.15 K, RIMP2/cc-PVT $\zeta$ ):

ZPE = 77.30 kJmol<sup>-1</sup>,  $H^{\circ}$  = -131.0147656 au,  $S^{\circ}$  = 231.02 Jmol<sup>-1</sup>K<sup>-1</sup>,  $G^{\circ}$  = -131.073890 au,  $C_v$  = 49.92 Jmol<sup>-1</sup>K<sup>-1</sup>.

## (g) [Pt(CCNC<sub>6</sub>H<sub>2</sub>Me<sub>2</sub>)(CO)<sub>2</sub>(PMe<sub>3</sub>)<sub>2</sub>(Tp)]<sup>+</sup> (7XyIP)

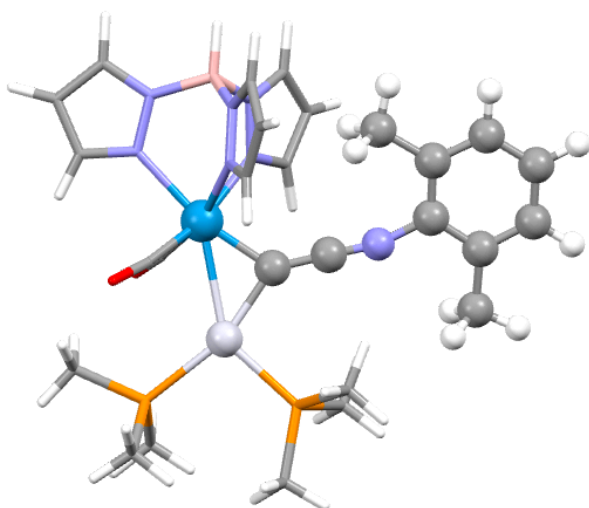

Figure S9. Optimised geometry for 7XyIP (Co-ligands simplified)

### Cartesian Coordinates

| Atom | x         | y         | z         |
|------|-----------|-----------|-----------|
| Pt   | 0.146915  | -1.401911 | 1.757412  |
| W    | -1.749535 | -0.065262 | 0.189406  |
| P    | 2.410271  | -1.672059 | 2.066788  |
| P    | -0.669883 | -2.903062 | 3.369666  |
| N    | -1.782586 | 2.138071  | 0.027259  |
| O    | -2.595424 | -3.115922 | 0.175949  |
| N    | -3.901735 | 0.276864  | -0.272261 |
| O    | -2.626038 | 0.112791  | 3.208593  |
| N    | -1.660532 | 0.118582  | -2.038870 |
| N    | 2.005614  | 0.763654  | -1.336477 |
| N    | -4.317386 | 1.175283  | -1.196487 |
| N    | -2.446000 | 2.796674  | -0.948224 |

| Atom | x         | y         | z         |
|------|-----------|-----------|-----------|
| N    | -2.360817 | 1.047069  | -2.724682 |
| C    | 1.166936  | 0.347588  | -0.619666 |
| C    | 0.222994  | -0.167111 | 0.186242  |
| C    | -2.225909 | -0.015328 | 2.125836  |
| C    | -2.233921 | -2.017394 | 0.208477  |
| C    | -6.142927 | 0.268092  | -0.326385 |
| H    | -7.173470 | 0.031211  | -0.114068 |
| C    | -1.206346 | 3.061147  | 0.804684  |
| C    | -5.003134 | -0.273406 | 0.258867  |
| C    | -0.971441 | -0.591848 | -2.937735 |
| C    | -5.656077 | 1.187148  | -1.244023 |
| C    | -2.116583 | 0.924471  | -4.040062 |
| C    | -1.221363 | -0.115129 | -4.225389 |
| H    | -0.818889 | -0.480824 | -5.156883 |
| C    | -1.492830 | 4.339044  | 0.324741  |
| H    | -1.175200 | 5.286097  | 0.731823  |
| B    | -3.289775 | 2.017814  | -1.977229 |
| C    | -2.288868 | 4.119923  | -0.787711 |
| C    | 2.730530  | 1.532127  | -2.227839 |
| C    | 4.059141  | 1.168052  | -2.495176 |
| C    | 4.670092  | -0.039751 | -1.838631 |
| H    | 4.622601  | 0.031545  | -0.745872 |
| H    | 5.718730  | -0.149775 | -2.123750 |
| H    | 4.143494  | -0.955582 | -2.131231 |
| C    | 0.670550  | 2.971871  | -2.498076 |
| H    | 0.004882  | 2.139698  | -2.749194 |
| H    | 0.340939  | 3.851270  | -3.055671 |
| H    | 0.538703  | 3.180731  | -1.429842 |
| C    | 2.098271  | 2.637710  | -2.822982 |
| C    | 2.854004  | 3.394429  | -3.714395 |
| H    | 2.397905  | 4.256600  | -4.191510 |
| C    | 4.174592  | 3.061494  | -3.997131 |
| H    | 4.745171  | 3.665884  | -4.694792 |
| C    | 4.769957  | 1.958319  | -3.392496 |
| H    | 5.800620  | 1.704715  | -3.620977 |
| H    | -3.834496 | 2.767760  | -2.739647 |
| H    | -0.622614 | 2.752096  | 1.659596  |
| H    | -2.758716 | 4.811194  | -1.471618 |
| H    | -0.341312 | -1.405570 | -2.609209 |
| H    | -2.596705 | 1.584216  | -4.747421 |
| H    | -4.910983 | -1.023088 | 1.031339  |
| H    | -6.171481 | 1.849805  | -1.923614 |
| C    | -0.186504 | -2.596468 | 5.110009  |
| H    | 0.898082  | -2.639827 | 5.224126  |
| H    | -0.641847 | -3.336768 | 5.775264  |
| H    | -0.526822 | -1.598408 | 5.400122  |
| C    | -2.486310 | -3.098616 | 3.529871  |
| H    | -2.706997 | -3.880488 | 4.263532  |
| H    | -2.919480 | -3.383848 | 2.569309  |
| H    | -2.937858 | -2.161808 | 3.861132  |
| C    | -0.150632 | -4.630120 | 3.040651  |
| H    | 0.938435  | -4.708613 | 2.999714  |
| H    | -0.550025 | -4.933566 | 2.068538  |
| H    | -0.528856 | -5.310296 | 3.810262  |
| C    | 3.110918  | -2.517039 | 3.534688  |
| H    | 4.198586  | -2.595605 | 3.437739  |
| H    | 2.697192  | -3.521351 | 3.650294  |
| H    | 2.883358  | -1.936167 | 4.432528  |
| C    | 3.310760  | -0.076256 | 2.123698  |
| H    | 4.390632  | -0.241122 | 2.199647  |
| H    | 2.973918  | 0.498388  | 2.990842  |
| H    | 3.097859  | 0.508694  | 1.226102  |
| C    | 3.191103  | -2.558452 | 0.667332  |
| H    | 4.280987  | -2.585177 | 0.770158  |
| H    | 2.927028  | -2.054104 | -0.265722 |
| H    | 2.806535  | -3.581001 | 0.620716  |

## SUPPORTING INFORMATION

**Thermodynamic properties (298.15 K,  $\omega$ BP97X-D/6-31G\*/LANL2D $\zeta$ ):**  $ZPE = 1541.15 \text{ kJmol}^{-1}$ ,  $H^\circ = -2478.31654 \text{ au}$ ,  $S^\circ = 1163.15 \text{ Jmol}^{-1}\text{K}^{-1}$ ,  $G^\circ = -2478.44862$ ,  $C_v = 754.39 \text{ Jmol}^{-1}\text{K}^{-1}$ .

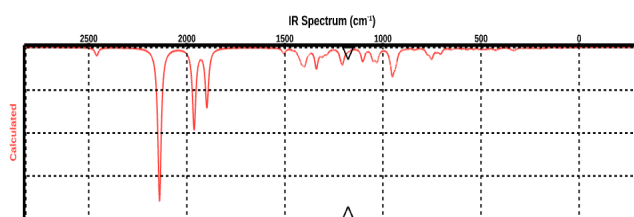

Figure S10. Calculated infrared spectrum for **7XyIP**

### (h) $[\text{Pt}(\text{CCNMe})(\text{CO})_2(\text{PMe}_3)_2(\text{Tp})]^+$ (**7MeP**)

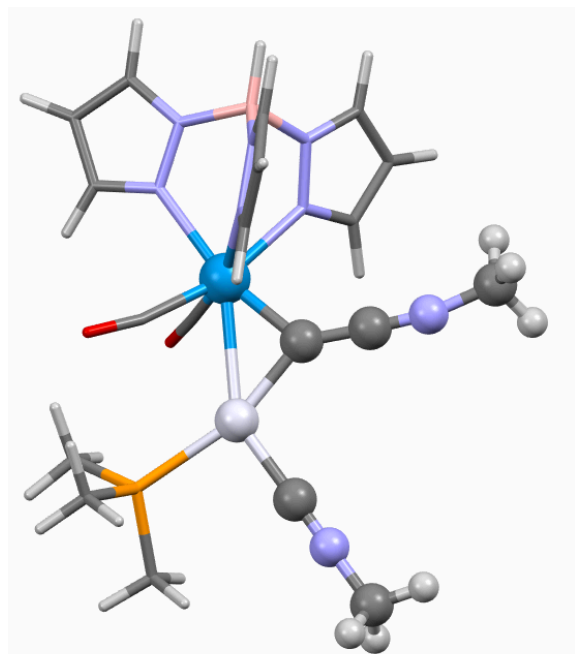

Figure S11. Optimised geometry for **7MeP** (Co-ligands simplified)

### Cartesian Coordinates

| Atom | x         | y         | z         |
|------|-----------|-----------|-----------|
| Pt   | 0.869696  | -1.100118 | 1.078577  |
| W    | -1.061646 | 0.300820  | -0.423591 |
| P    | 3.107770  | -1.474040 | 1.421454  |
| P    | 0.061281  | -2.573435 | 2.727528  |
| N    | -1.041478 | 2.520678  | -0.412973 |
| O    | -1.878224 | -2.745164 | -0.708232 |
| N    | -3.195532 | 0.732888  | -0.890921 |
| O    | -2.076069 | 0.128191  | 2.549674  |
| N    | -0.940805 | 0.658780  | -2.635004 |
| N    | 2.323327  | 1.634924  | -1.942969 |
| N    | -3.572776 | 1.705530  | -1.754661 |
| N    | -1.681644 | 3.270692  | -1.336937 |
| N    | -1.582310 | 1.674954  | -3.249264 |

| Atom | x         | y         | z         |
|------|-----------|-----------|-----------|
| C    | 1.696350  | 0.969035  | -1.205755 |
| C    | 0.914420  | 0.238252  | -0.385087 |
| C    | -1.608650 | 0.146931  | 1.484724  |
| C    | -1.531703 | -1.651067 | -0.579979 |
| C    | -5.434088 | 0.755859  | -1.014049 |
| H    | -6.473204 | 0.516763  | -0.851407 |
| C    | -0.440410 | 3.365703  | 0.430628  |
| C    | -4.318601 | 0.155821  | -0.439402 |
| C    | -0.248538 | 0.008231  | -3.575579 |
| C    | -4.909313 | 1.736785  | -1.842231 |
| C    | -1.295826 | 1.670684  | -4.560516 |
| C    | -0.432602 | 0.617526  | -4.818532 |
| H    | -0.023134 | 0.318610  | -5.770962 |
| C    | -0.687238 | 4.684367  | 0.048459  |
| H    | -0.345322 | 5.588500  | 0.527409  |
| B    | -2.516986 | 2.594791  | -2.439670 |
| C    | -1.484130 | 4.573486  | -1.078927 |
| H    | -3.035149 | 3.411603  | -3.149764 |
| H    | 0.131491  | 2.976218  | 1.260291  |
| H    | -1.930409 | 5.327633  | -1.710294 |
| H    | 0.337911  | -0.858298 | -3.305783 |
| H    | -1.735489 | 2.406316  | -5.217850 |
| H    | -4.259256 | -0.653343 | 0.274037  |
| H    | -5.396588 | 2.455525  | -2.484610 |
| C    | 0.013555  | -1.817982 | 4.394175  |
| H    | 1.017602  | -1.505846 | 4.693504  |
| H    | -0.381041 | -2.521635 | 5.134087  |
| H    | -0.627944 | -0.933634 | 4.361016  |
| C    | -1.648839 | -3.192890 | 2.503447  |
| H    | -1.938633 | -3.808638 | 3.360870  |
| H    | -1.711087 | -3.792380 | 1.592323  |
| H    | -2.343561 | -2.355304 | 2.419824  |
| C    | 0.961748  | -4.150366 | 2.996597  |
| H    | 1.991241  | -3.971049 | 3.316927  |
| H    | 0.979999  | -4.722125 | 2.064248  |
| H    | 0.461135  | -4.746371 | 3.765963  |
| C    | 3.697586  | -1.393599 | 3.154797  |
| H    | 4.781387  | -1.541066 | 3.201548  |
| H    | 3.213252  | -2.159522 | 3.764707  |
| H    | 3.450454  | -0.414503 | 3.574516  |
| C    | 4.213862  | -0.271284 | 0.593835  |
| H    | 5.261010  | -0.474246 | 0.840374  |
| H    | 3.959064  | 0.743984  | 0.909259  |
| H    | 4.084747  | -0.341351 | -0.489499 |
| C    | 3.749189  | -3.074592 | 0.803900  |
| H    | 4.829638  | -3.147760 | 0.965402  |
| H    | 3.538932  | -3.153748 | -0.266175 |
| H    | 3.255139  | -3.906940 | 1.309324  |
| C    | 2.660159  | 2.477880  | -3.036806 |
| H    | 3.715427  | 2.356267  | -3.287191 |
| H    | 2.471720  | 3.518951  | -2.761764 |
| H    | 2.039132  | 2.209121  | -3.897043 |

**Thermodynamic properties (298.15 K,  $\omega$ BP97X-D/6-31G\*/LANL2D $\zeta$ ):**  $ZPE = 1270.06 \text{ kJmol}^{-1}$ ,  $H^\circ = -2208.12211 \text{ au}$ ,  $S^\circ = 1051.43 \text{ Jmol}^{-1}\text{K}^{-1}$ ,  $G^\circ = -2208.24151 \text{ au}$ ,  $C_v = 635.08 \text{ Jmol}^{-1}\text{K}^{-1}$ .



# SUPPORTING INFORMATION

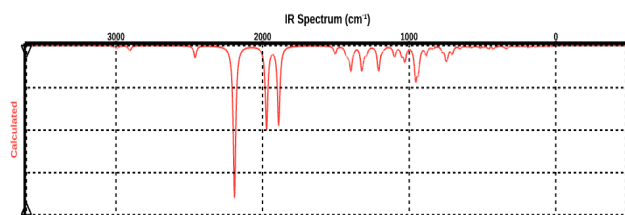

Figure S12. Calculated infrared spectrum for **7MeP**

(i) **[Pt(CCNMe)(CO)<sub>2</sub>(PMe<sub>3</sub>)(CNMe)(Tp)]<sup>+</sup> (**7MeC**)**

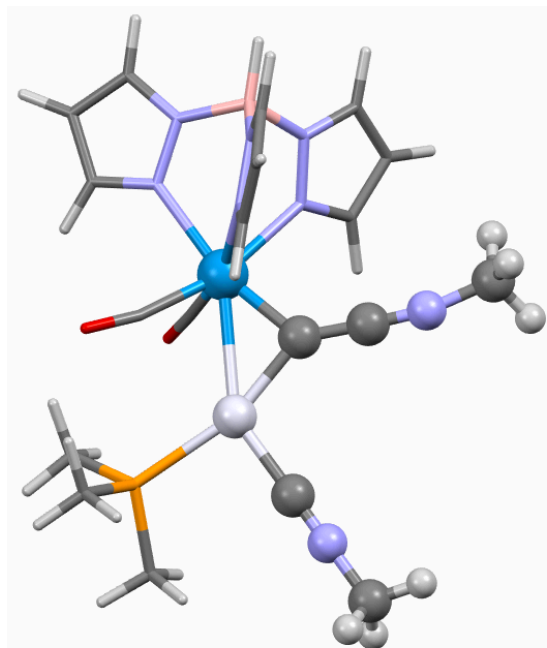

Figure S13. Optimised geometry for **7MeC** (Co-ligands simplified)

### Cartesian Coordinates

| Atom | x         | y         | z         |
|------|-----------|-----------|-----------|
| Pt   | 1.223565  | -1.140134 | 1.245756  |
| W    | -0.708000 | 0.136533  | -0.340054 |
| P    | 0.468247  | -2.478764 | 3.040220  |
| N    | -0.737870 | 2.331762  | -0.222788 |
| O    | -1.547284 | -2.916291 | -0.633781 |
| N    | -2.863272 | 0.549340  | -0.780136 |
| O    | -1.751755 | -0.051263 | 2.606560  |
| N    | -0.627512 | 0.565886  | -2.543512 |
| N    | 2.873762  | 0.954663  | -2.067323 |
| N    | -3.254493 | 1.548633  | -1.605897 |
| N    | -1.382228 | 3.113927  | -1.117725 |
| N    | -1.274655 | 1.606686  | -3.108278 |
| C    | 2.141395  | 0.495278  | -1.278218 |
| C    | 1.251757  | -0.008469 | -0.390912 |
| C    | -1.240763 | -0.043808 | 1.557610  |
| C    | -1.211064 | -1.820106 | -0.532196 |
| C    | -5.103009 | 0.577703  | -0.862343 |
| H    | -6.139131 | 0.333353  | -0.688995 |
| C    | -0.159756 | 3.145324  | 0.667978  |
| C    | -3.977497 | -0.038437 | -0.323611 |
| C    | 0.010582  | -0.076230 | -3.527134 |
| C    | -4.592937 | 1.584748  | -1.667083 |

| Atom | x         | y         | z         |
|------|-----------|-----------|-----------|
| C    | -1.044586 | 1.626456  | -4.430631 |
| C    | -0.213222 | 0.564318  | -4.747589 |
| H    | 0.150518  | 0.280452  | -5.723023 |
| C    | -0.426280 | 4.475142  | 0.346138  |
| H    | -0.105040 | 5.360859  | 0.871309  |
| B    | -2.209674 | 2.481536  | -2.251973 |
| C    | -1.212156 | 4.404591  | -0.792664 |
| H    | -2.739358 | 3.326649  | -2.919302 |
| H    | 0.412940  | 2.724920  | 1.481849  |
| H    | -1.666490 | 5.181109  | -1.390199 |
| H    | 0.586848  | -0.963008 | -3.304662 |
| H    | -1.494881 | 2.386643  | -5.051751 |
| H    | -3.907349 | -0.864843 | 0.368967  |
| H    | -5.090459 | 2.327466  | -2.273289 |
| C    | 0.264626  | -1.601274 | 4.630109  |
| H    | 1.225561  | -1.179214 | 4.937257  |
| H    | -0.095895 | -2.282116 | 5.407647  |
| H    | -0.451759 | -0.786719 | 4.502674  |
| C    | -1.133161 | -3.322594 | 2.772793  |
| H    | -1.388366 | -3.940314 | 3.639627  |
| H    | -1.071911 | -3.956169 | 1.884305  |
| H    | -1.920294 | -2.581421 | 2.621153  |
| C    | 1.586620  | -3.867345 | 3.460592  |
| H    | 2.558153  | -3.479007 | 3.778562  |
| H    | 1.735063  | -4.499755 | 2.580924  |
| H    | 1.166116  | -4.472065 | 4.269772  |
| C    | 3.500972  | 1.529440  | -3.202775 |
| H    | 4.375524  | 0.937136  | -3.480639 |
| H    | 3.815303  | 2.549441  | -2.969204 |
| H    | 2.785454  | 1.546397  | -4.029864 |
| C    | 3.084609  | -1.591028 | 1.561050  |
| N    | 4.203149  | -1.846320 | 1.769924  |
| C    | 5.568381  | -2.151538 | 2.016304  |
| H    | 6.200534  | -1.540135 | 1.369075  |
| H    | 5.747273  | -3.208650 | 1.808261  |
| H    | 5.805153  | -1.939375 | 3.061133  |

**Thermodynamic properties (298.15 K, ωBP97X-D/6-31G\*(LANL2Dζ):** ZPE = 1099.16 kJmol<sup>-1</sup>, H° = -1879.81153 au, S° = 1011.41 Jmol<sup>-1</sup>K<sup>-1</sup>, G° = -1879.92638 au, Cv = 579.68 Jmol<sup>-1</sup>K<sup>-1</sup>.

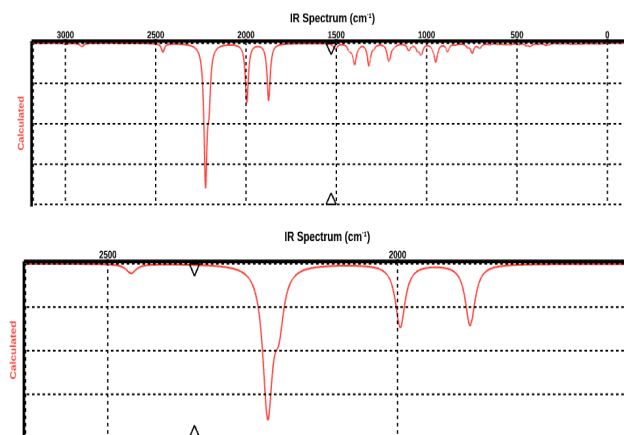

Figure S14. Calculated infrared spectrum for **7MeC** (Expansion showing νCN/νCO region)

## Molecular Mechanics Modelling of Bent CCNC<sub>6</sub>H<sub>3</sub>Me<sub>2</sub> Ligand in [5a]<sup>+</sup>.

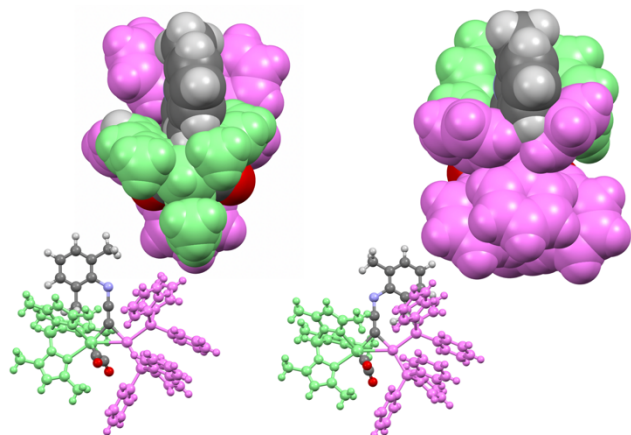

**Figure S15.** Illustration of non-viability of C–N–C binding of the CCNC<sub>6</sub>H<sub>3</sub>Me<sub>2</sub>,6 ligand in [5a]<sup>+</sup> (Tp\* ligand green, PPh<sub>3</sub> ligand pink).

## Molecular Orbitals of Free Iminoketenylidenes

In contrast to CCO and CCS which have cylindrical  $C_{\infty v}$  symmetry, hypothetical iminoketenylidenes have  $C_s$  symmetry due to bending at nitrogen thereby lifting the  $\pi$ -orbital degeneracy and, upon coordination, possibly giving rise to conformational preferences. We consider here the valence orbitals and geometries of the free iminoketenylidenes CCNMe (**6<sub>s</sub>Me**) and CCNPh (**6<sub>s</sub>Ph**) which are depicted in Figure S16 ( $\omega$ B97X-V/6-31G\*). The singlet geometries of both derivatives have conventional  $sp^2$ -N angles (**6<sub>s</sub>Me**: 118.7°, **6<sub>s</sub>Ph**: 121.1°) and short C=N and C=C (Ph: 1.307, Me: 1.316 Å) bonds. The triplet optimised geometries **6<sub>t</sub>Me** and **6<sub>t</sub>Ph** lie, respectively, 1.5 and 10.1 kcalmol<sup>-1</sup> (RI-MP2/cc-pVT $\zeta$ ) above the corresponding singlet geometries at this level of theory, the latter reflecting the clear and quite substantial involvement of arene-based orbitals. The most dramatic change in geometry in proceeding from singlet to triplet spin multiplicities is the opening of the C–N–C angle to 149.3° for **6<sub>t</sub>Me** and 147.7° for **6<sub>t</sub>Ph** and attended by a modest increase in the negative charge at the terminal carbon, consistent with increased  $sp$ -character in the nitrogen hybridisation. The frontier orbitals for **6<sub>s</sub>Ph** comprise *one* energetically accessible  $\pi$ -acceptor orbital (LUMO) and a low lying  $\sigma$ -donor orbital (HOMO-3) straddled by two occupied orbitals of  $\pi$ -symmetry (HOMO, HOMO-1).

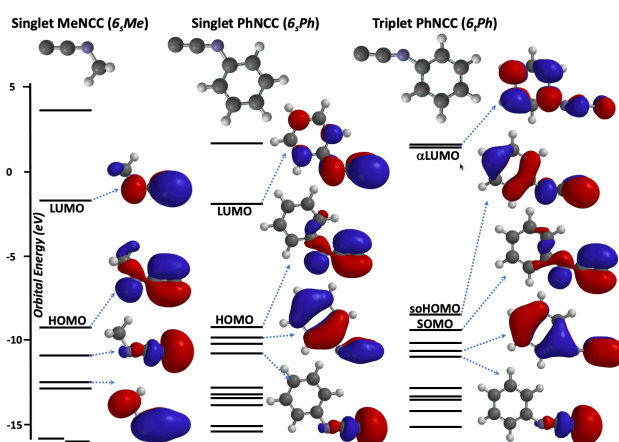

**Figure S16.** Frontier orbitals of interest for optimised geometries (DFT:  $\omega$ B97X-V/6-31G\*) of (a) singlet CCNMe **6<sub>s</sub>Me** and CCNPh **6<sub>s</sub>Ph** and (b) triplet CCNPh **6<sub>t</sub>Ph**.

## Calculated<sup>a</sup> Electronic Spectrum for 7MesP

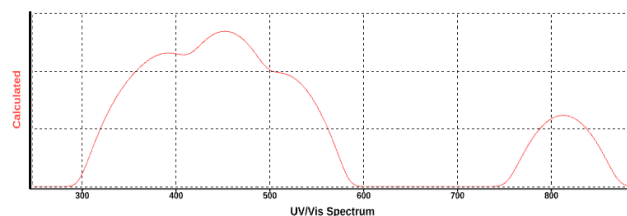

| Wavelength<br>nm | Intensity<br>(relative) | Origin          | Contribution<br>% |
|------------------|-------------------------|-----------------|-------------------|
| 368.78           | 0.0066                  | HOMO-4 → LUMO   | 62%               |
| 391.74           | 0.0378                  | HOMO → LUMO+1   | 57%               |
|                  |                         | HOMO-1 → LUMO+1 | 30%               |
| 414.13           | 0.0050                  | HOMO-1 → LUMO+1 | 58%               |
|                  |                         | HOMO → LUMO+1   | 31%               |
| 452.18           | 0.2419                  | HOMO-1 → LUMO   | 80%               |
| 511.54           | 0.0082                  | HOMO-2 → LUMO   | 82%               |
| 812.67           | 0.0003                  | HOMO → LUMO     | 87%               |

TD-DFT:  $\omega$ B97X-V/6-31G\*/LANL2Dz(W,Pt)

## SUPPORTING INFORMATION

### Calculated<sup>a</sup> Electronic Spectrum for [5a]<sup>+</sup>

Due to the large number of atoms in the real complex [5a]<sup>+</sup>, the following data were calculated based on the non-optimised crystallographically determined geometry for [5a]<sup>+</sup> and are only provided for

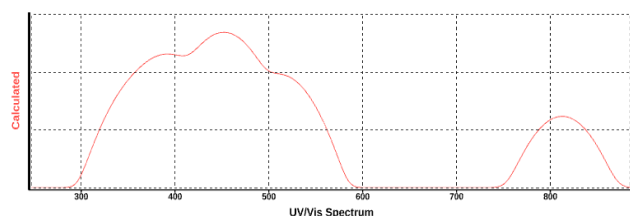

| Wavelength<br>nm | Intensity<br>(relative) | Origin          | Contribution<br>% |
|------------------|-------------------------|-----------------|-------------------|
| 368.78           | 0.0066                  | HOMO-4 → LUMO   | 62%               |
| 391.74           | 0.0378                  | HOMO → LUMO+1   | 57%               |
|                  |                         | HOMO-1 → LUMO+1 | 30%               |
| 414.13           | 0.0050                  | HOMO-1 → LUMO+1 | 58%               |
|                  |                         | HOMO → LUMO+1   | 31%               |
| 452.18           | 0.2419                  | HOMO-1 → LUMO   | 80%               |
| 511.54           | 0.0082                  | HOMO-2 → LUMO   | 82%               |
| 812.67           | 0.0003                  | HOMO → LUMO     | 87%               |

TD-DFT: ωB97X-V/6-31G\*/LANL2Dz(W,Pt)

6620. (c) M. Mardirossian and M. Head-Gordon, *Phys. Chem. Chem. Phys.*, 2014, **16**, 9904 – 9924.
- 7 (a) P. J. Hay and W. R. Wadt, *J. Chem. Phys.*, 1985, **82**, 270–283; (b) W. R. Wadt and P. J. Hay, *J. Chem. Phys.*, 1985, **82**, 284–298; (c) P. J. Hay and W. R. Wadt, *J. Chem. Phys.*, 1985, **82**, 299–310.
- 8 W. J. Hehre, R. Ditchfeld and J. A. Pople, *J. Chem. Phys.*, 1972, **56**, 2257–2261.
- 9 R. A. Kendall, T. H. Dunning Jr. and R. J. Harrison, *J. Chem. Phys.*, 1992, **96**, 6796–806.

### Author Contributions

Both LKB and AFH contributed equally to the conceptualization, experimental design, interpretation of experimental results and manuscript compilation. All experimental procedures and data acquisition, including structural analysis, were executed by LKB. AFH was responsible for overall project administration.

### Notes and references

- 1 (a) L. K. Burt, R. L. Cordiner, A. F. Hill, R. A. Manzano and J. Wagler, *Chem. Commun.*, 2020, **56**, 5673–5676. (b) M. Green, J. A. K. Howard, M. Murray, J. L. Spencer and F. G. A. Stone, *J. Chem. Soc., Dalton Trans.*, 1977, 1509–1514.
- 2 *CrysAlisPRO*, Oxford Diffraction, Agilent Technologies UK Ltd, Yarnton, England.
- 3 (a) G. Sheldrick, *Acta Crystallogr., Sect A: Found Crystallogr.*, 2008, **64**, 112–122; (b) G. M. Sheldrick, *Acta Crystallogr., Sect C: Cryst. Struct. Commun.*, 2015, **71**, 3–8.
- 4 (a) C. F. Macrae, P. R. Edgington, P. McCabe, E. Pidcock, G. P. Shields, R. Taylor, M. Towler and J. van de Streek, *J. Appl. Crystallogr.*, 2006, **39**, 453–457; (b) C. F. Macrae, I. J. Bruno, J. A. Chisholm, P. R. Edgington, P. McCabe, E. Pidcock, L. Rodriguez-Monge, R. Taylor, J. van de Streek and P. A. Wood, *J. Appl. Crystallogr.*, 2008, **41**, 466–470.
- 5 *Spartan18*®, Wavefunction, Inc., 18401 Von Karman Ave., Suite 370, Irvine, CA 92612 U.S.A., 2018
- 6 (a) J.-D. Chai and M. Head-Gordon, *J. Chem. Phys.*, 2008, **128**, 0841061–18410615; (b) J.-D. Chai and M. HeadGordon, *Phys. Chem. Chem. Phys.*, 2008, **10**, 6615–

## SUPPORTING INFORMATION

### Selected Spectra

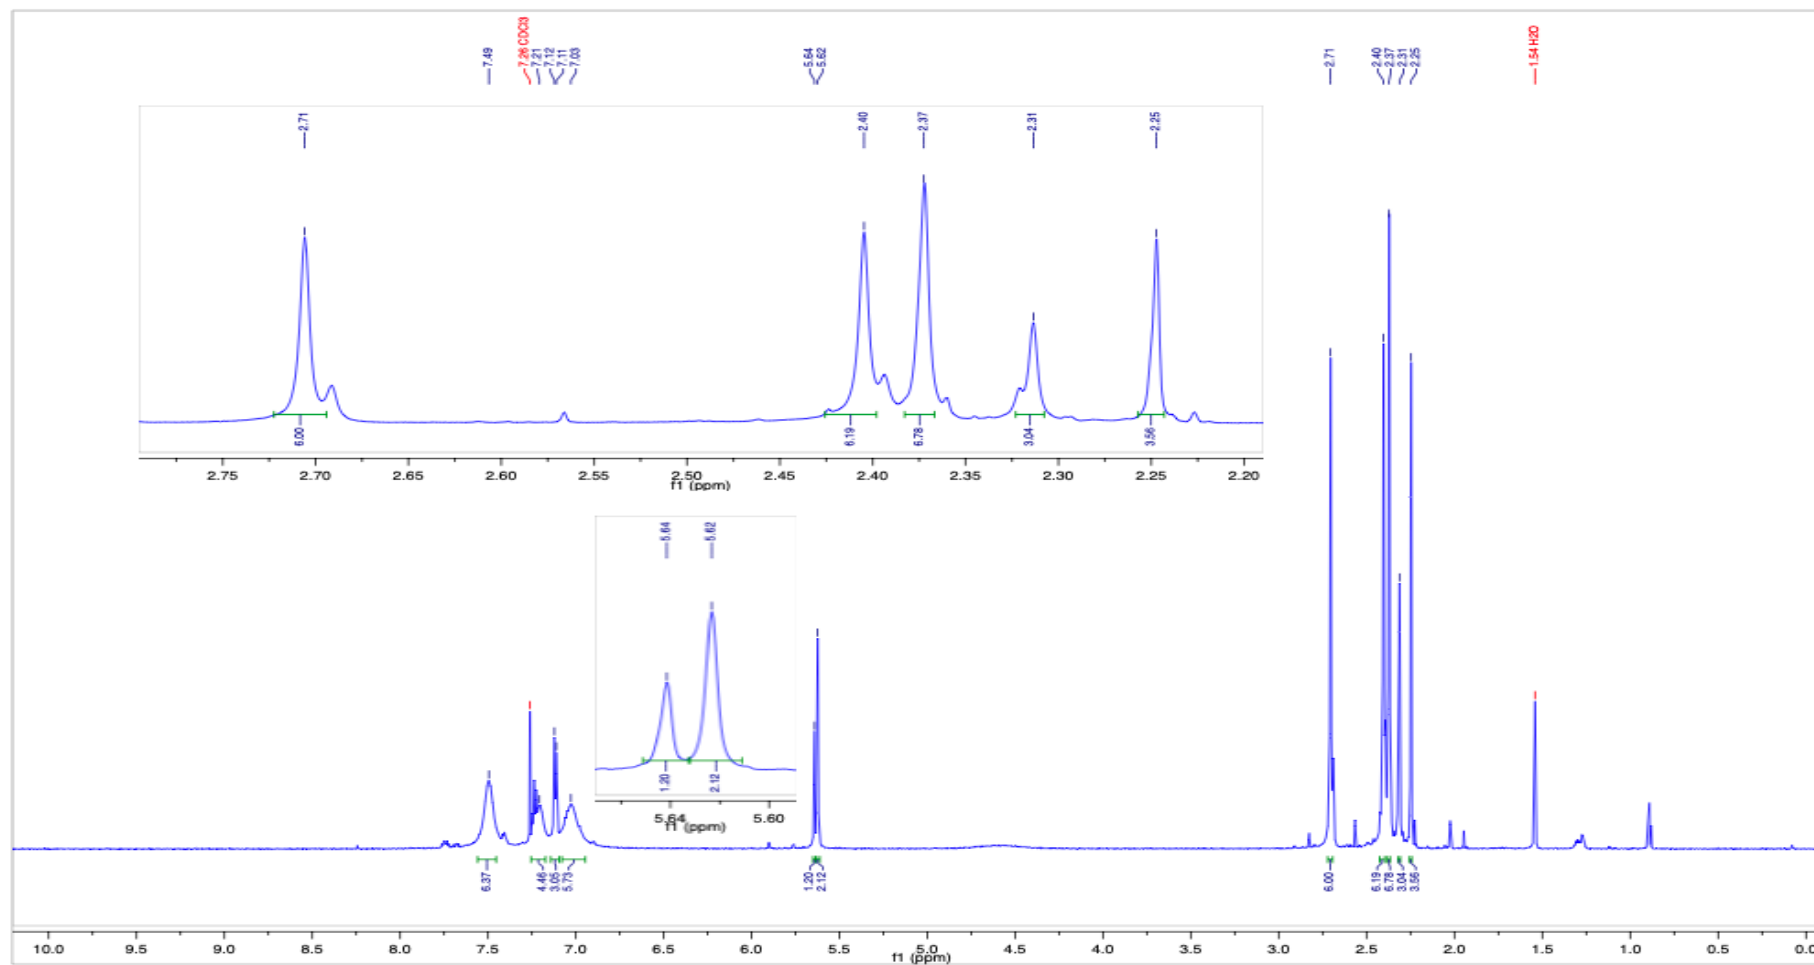

**Figure S17.**  $^1\text{H}$  NMR Spectrum (700 MHz,  $\text{CDCl}_3$ , 298 K,  $\delta$ ) of  $[\text{WPt}(\mu\text{-C})\text{Br}(\text{CO})_2(\text{CNC}_6\text{H}_3\text{Me}_2)(\text{PPh}_3)(\text{Tp}^*)]$  (**3a**).

# SUPPORTING INFORMATION

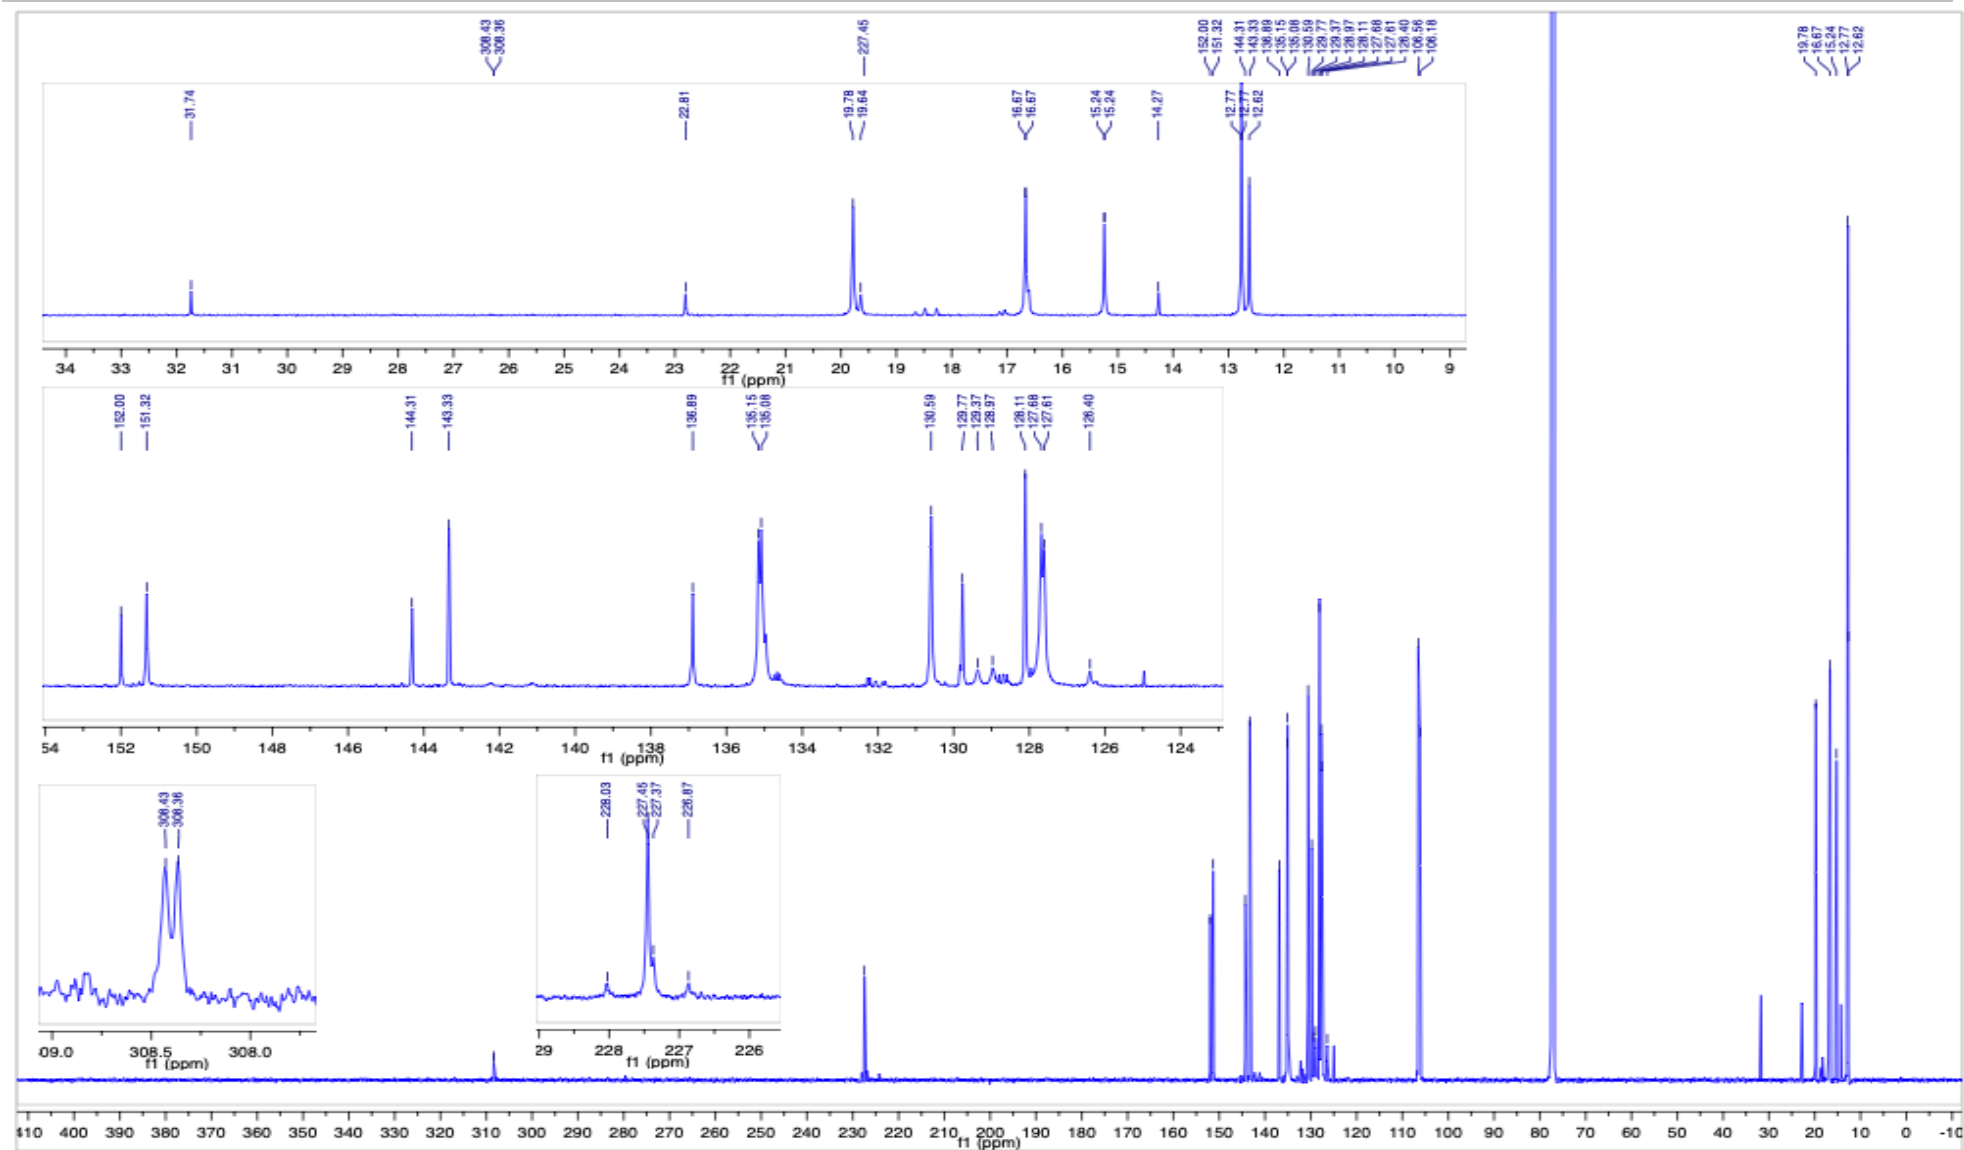

**Figure S18.**  $^{13}\text{C}\{^1\text{H}\}$  NMR Spectrum (151 MHz,  $\text{CDCl}_3$ , 298 K,  $\delta$ ) of  $[\text{WPt}(\mu\text{-C})\text{Br}(\text{CO})_2(\text{CNC}_6\text{H}_5\text{Me}_2)(\text{PPh}_3)(\text{Tp}^*)]$  (3a).

## SUPPORTING INFORMATION

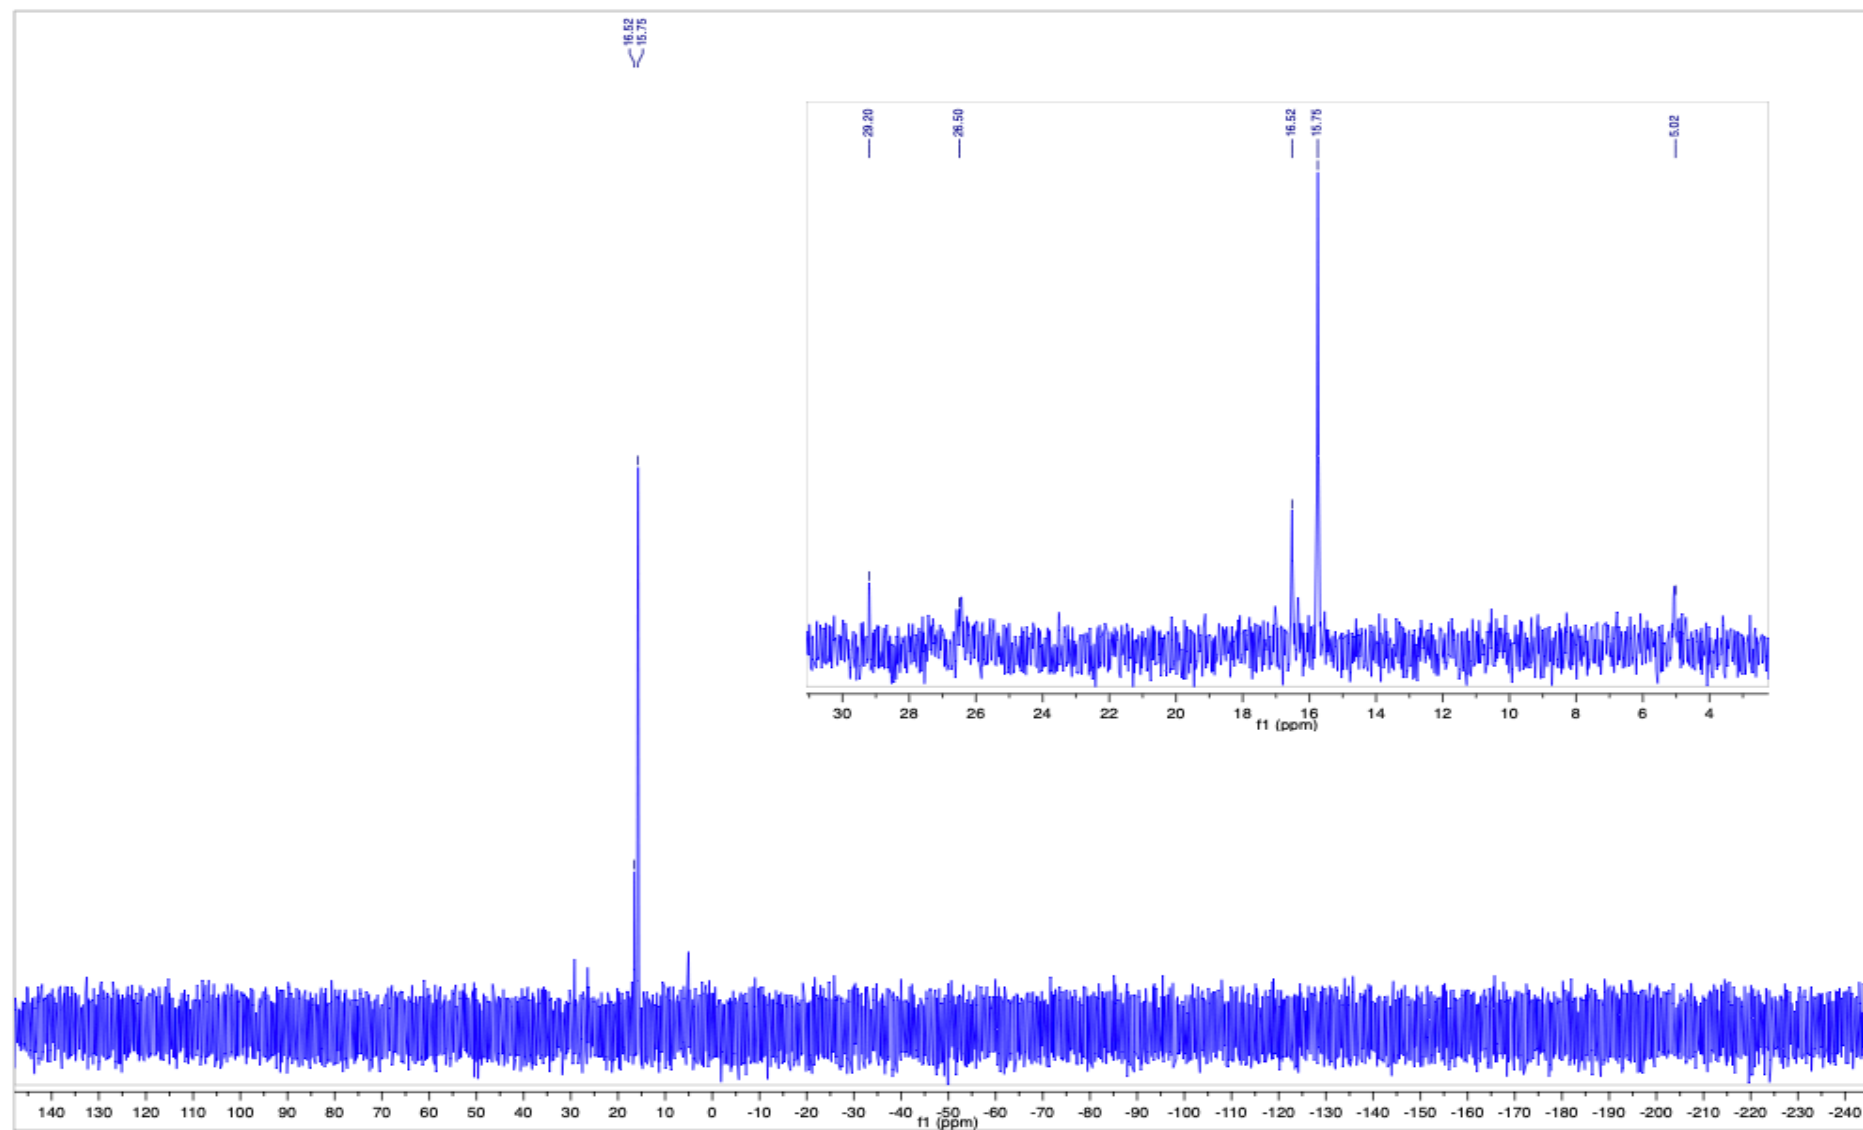

**Figure S19.**  $^{31}\text{P}\{^1\text{H}\}$  NMR Spectrum (162 MHz,  $\text{CDCl}_3$ , 298 K,  $\delta$ ) of  $[\text{WPt}(\mu\text{-C})\text{Br}(\text{CO})_2(\text{CNC}_6\text{H}_3\text{Me}_2)(\text{PPh}_3)(\text{Tp}^*)]$  (3a).

## SUPPORTING INFORMATION

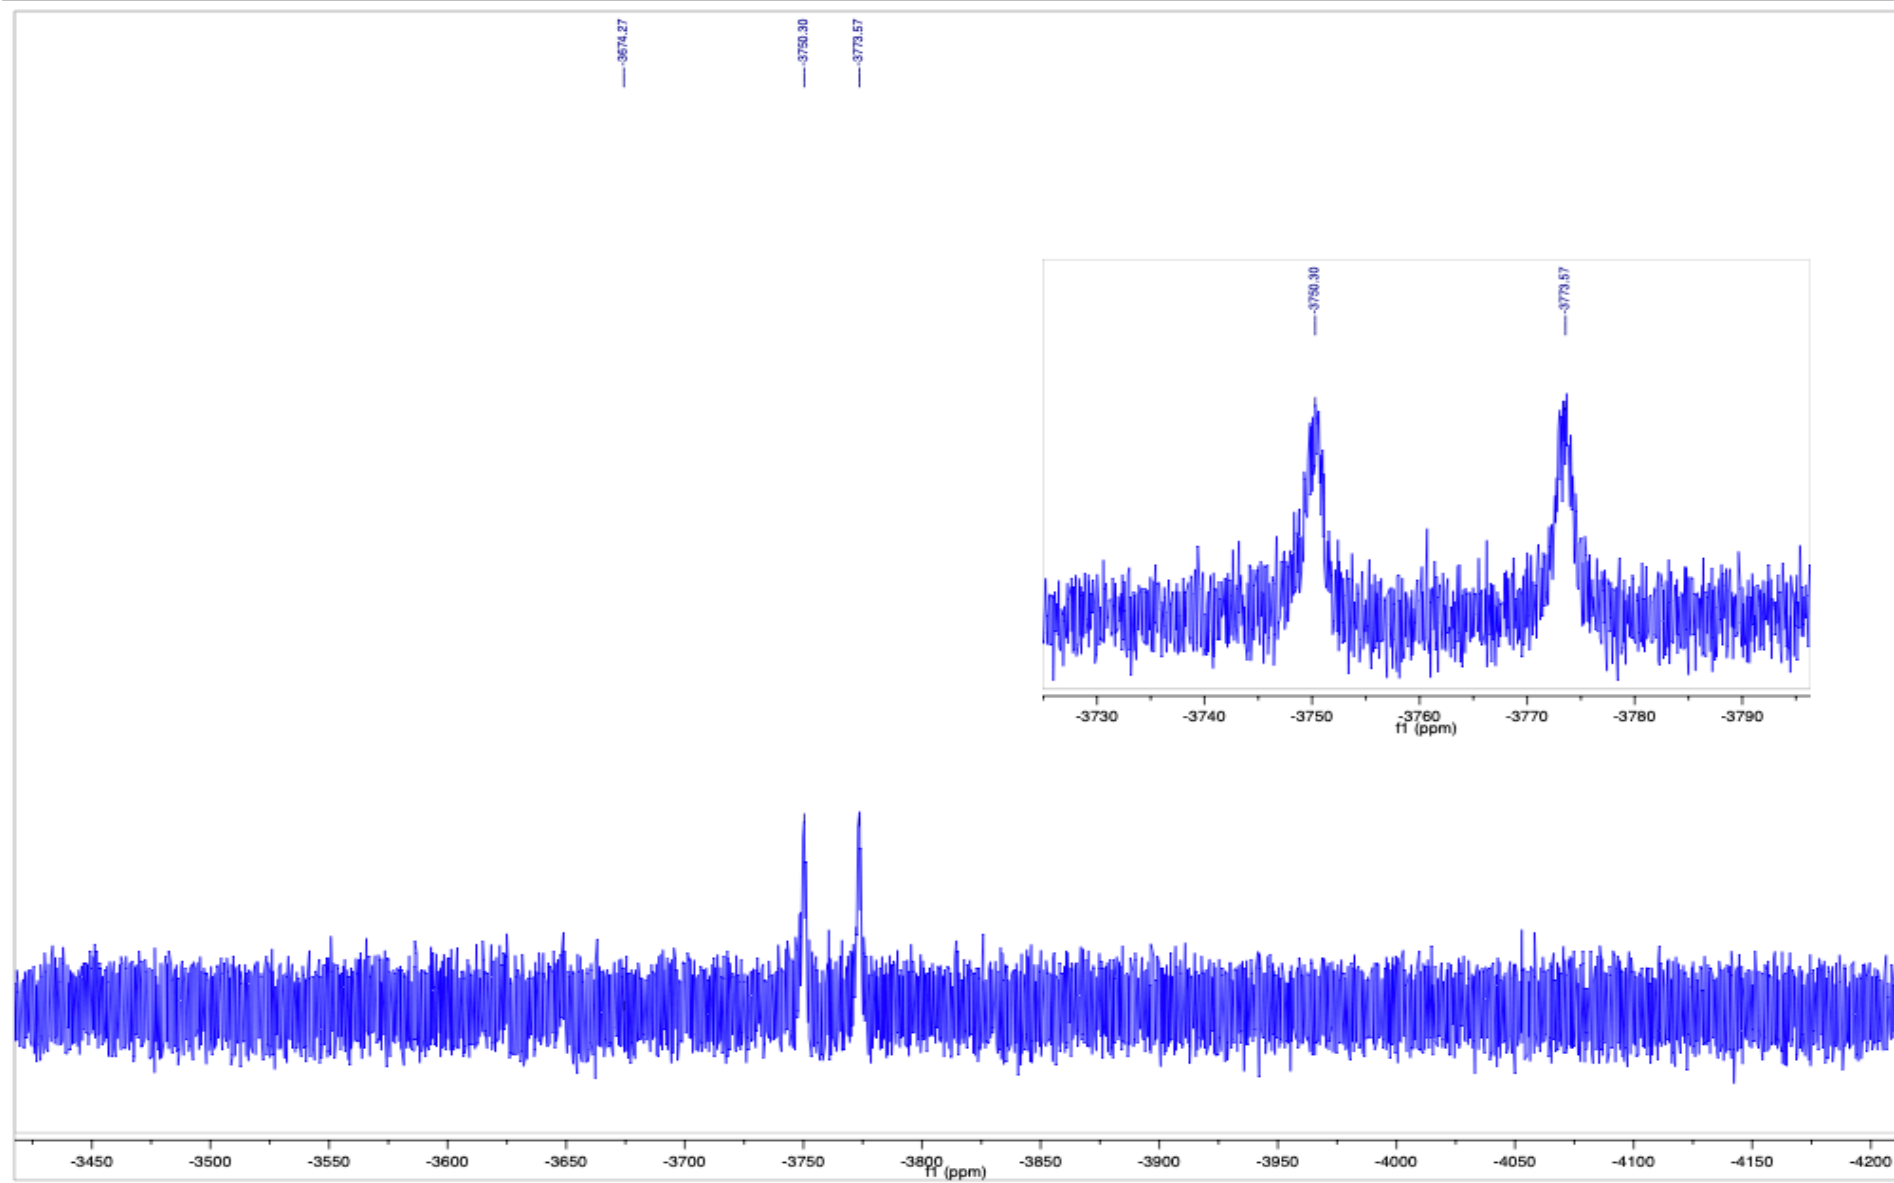

**Figure S20.**  $^{195}\text{Pt}\{^1\text{H}\}$  NMR Spectrum (149.9 MHz,  $\text{CDCl}_3$ , 298 K,  $\delta$ ) of  $[\text{WPt}(\mu\text{-C})\text{Br}(\text{CO})_2(\text{CNC}_6\text{H}_3\text{Me}_2)(\text{PPh}_3)(\text{Tp}^*)]$  (3a)

## SUPPORTING INFORMATION

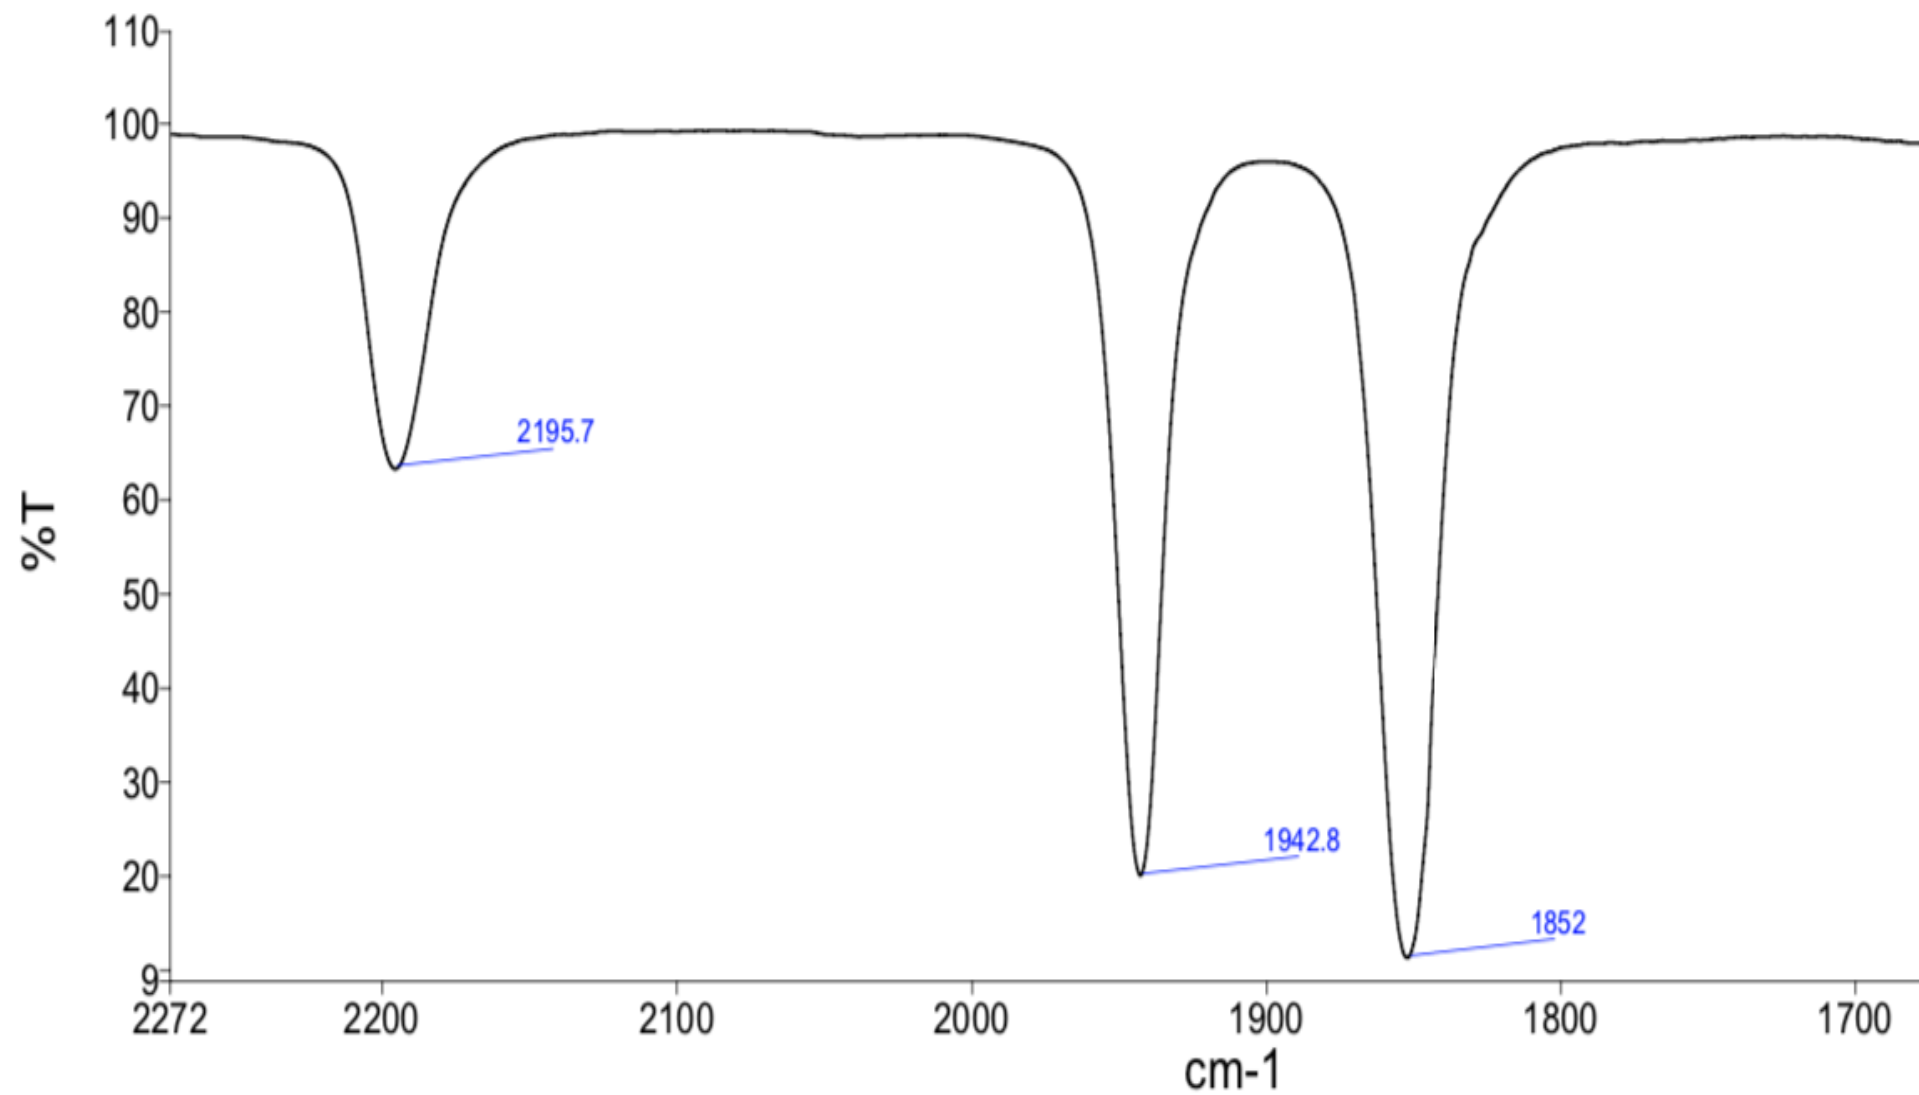

Figure S21. Infrared Spectrum (CH<sub>2</sub>Cl<sub>2</sub>, 298 K, cm<sup>-1</sup>) of [WPt(μ-C)Br(CO)<sub>2</sub>(CNC<sub>6</sub>H<sub>3</sub>Me<sub>2</sub>)(PPh<sub>3</sub>)(Tp\*)] (**3a**)



## SUPPORTING INFORMATION

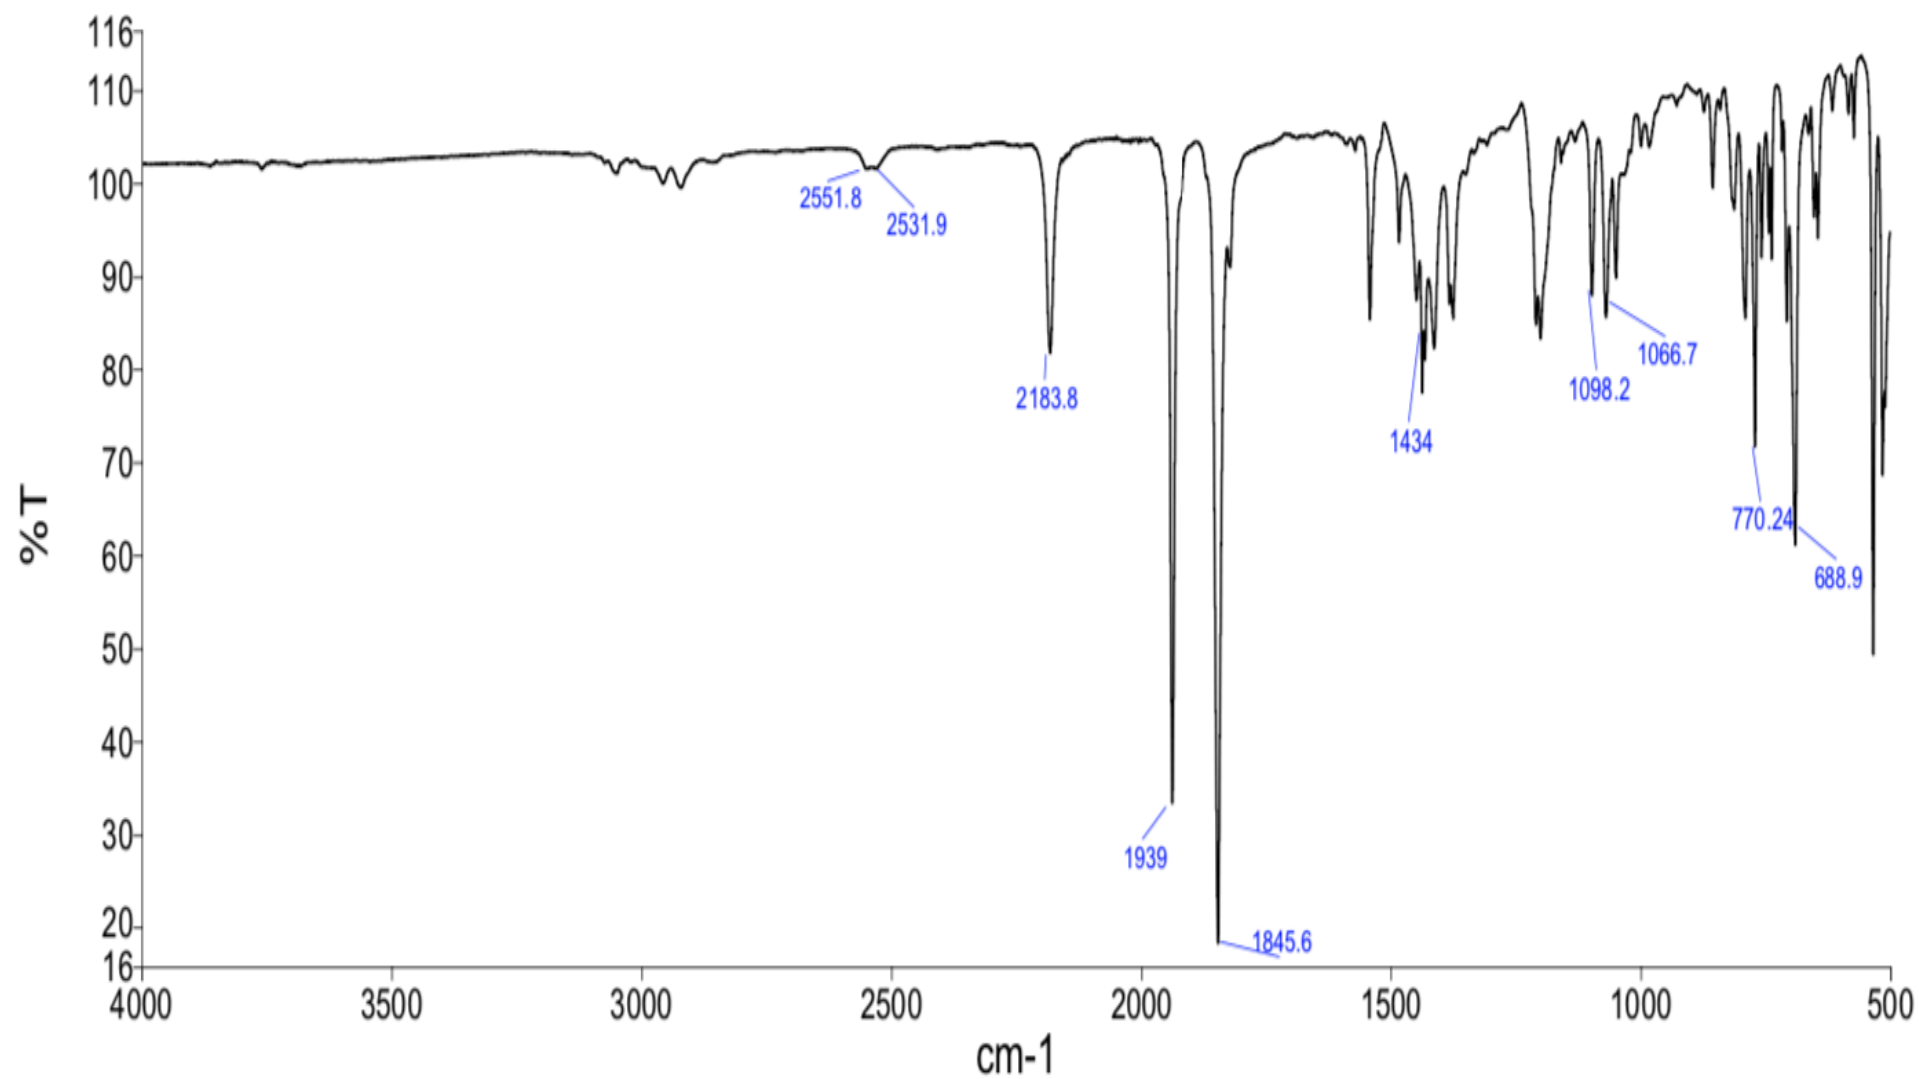

Figure S22. Infrared Spectrum (ATR Diamond anvil,, 298 K, cm<sup>-1</sup>) of [WPt(μ-C)Br(CO)<sub>2</sub>(CNC<sub>6</sub>H<sub>3</sub>Me<sub>2</sub>)(PPh<sub>3</sub>)(Tp\*)] (**3a**)

## Single Mass Analysis

Tolerance = 3.0 PPM / DBE: min = -1.5, max = 30.0

Element prediction: Off

Number of isotope peaks used for i-FIT = 3

Monoisotopic Mass, Even Electron Ions

872 formula(e) evaluated with 1 results within limits (up to 50 best isotopic matches for each mass)

Elements Used:

C: 0-50 H: 0-50 11B: 1-1 N: 0-7 O: 0-2 P: 0-1 79Br: 0-1 81Br: 0-1 184W: 0-1 195Pt: 0-1

LB-5-90/AJ

66373

0127 55 (0.126) Cm (53:77)

SYNAPTG2-Si#NotSet

11-Feb-2021

15:13:38

1: TOF MS ES+

4.91e+005

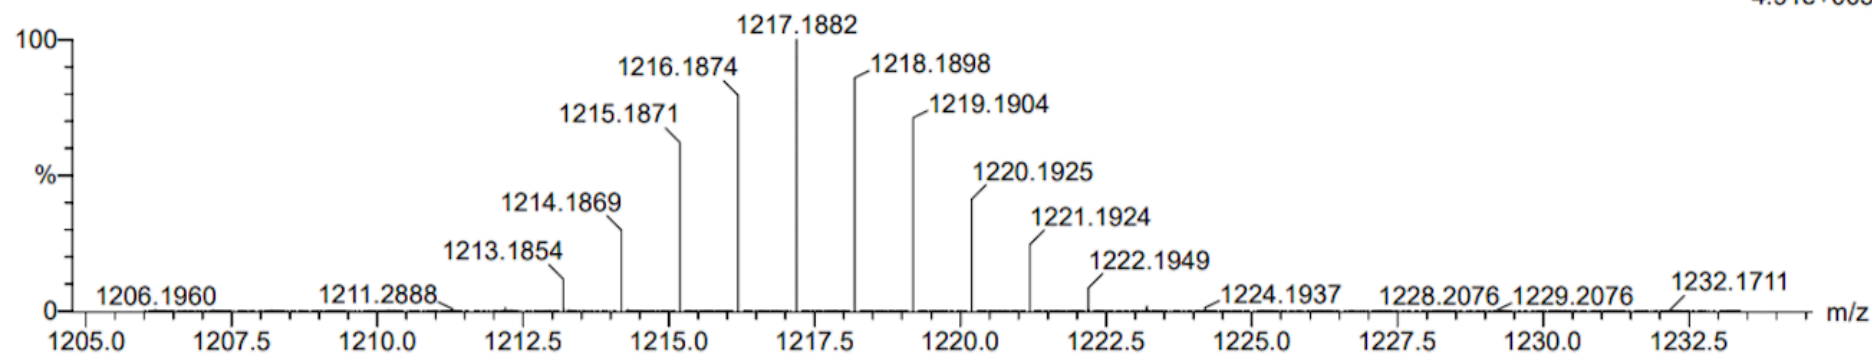

Minimum: -1.5  
 Maximum: 5.0 3.0 30.0

| Mass      | Calc. Mass | mDa  | PPM  | DBE  | i-FIT  | Norm | Conf (%) | Formula                             |
|-----------|------------|------|------|------|--------|------|----------|-------------------------------------|
| 1216.1874 | 1216.1884  | -1.0 | -0.8 | 29.5 | 1165.8 | n/a  | n/a      | C45 H46 11B N7 O2 P 79Br 184W 195Pt |

Figure S23. ESI Mass Spectrum (+ve ion) of  $[\text{WPt}(\mu\text{-C})\text{Br}(\text{CO})_2(\text{CNC}_6\text{H}_3\text{Me}_2)(\text{PPh}_3)(\text{Tp}^*)]$  (**3a**).

# SUPPORTING INFORMATION

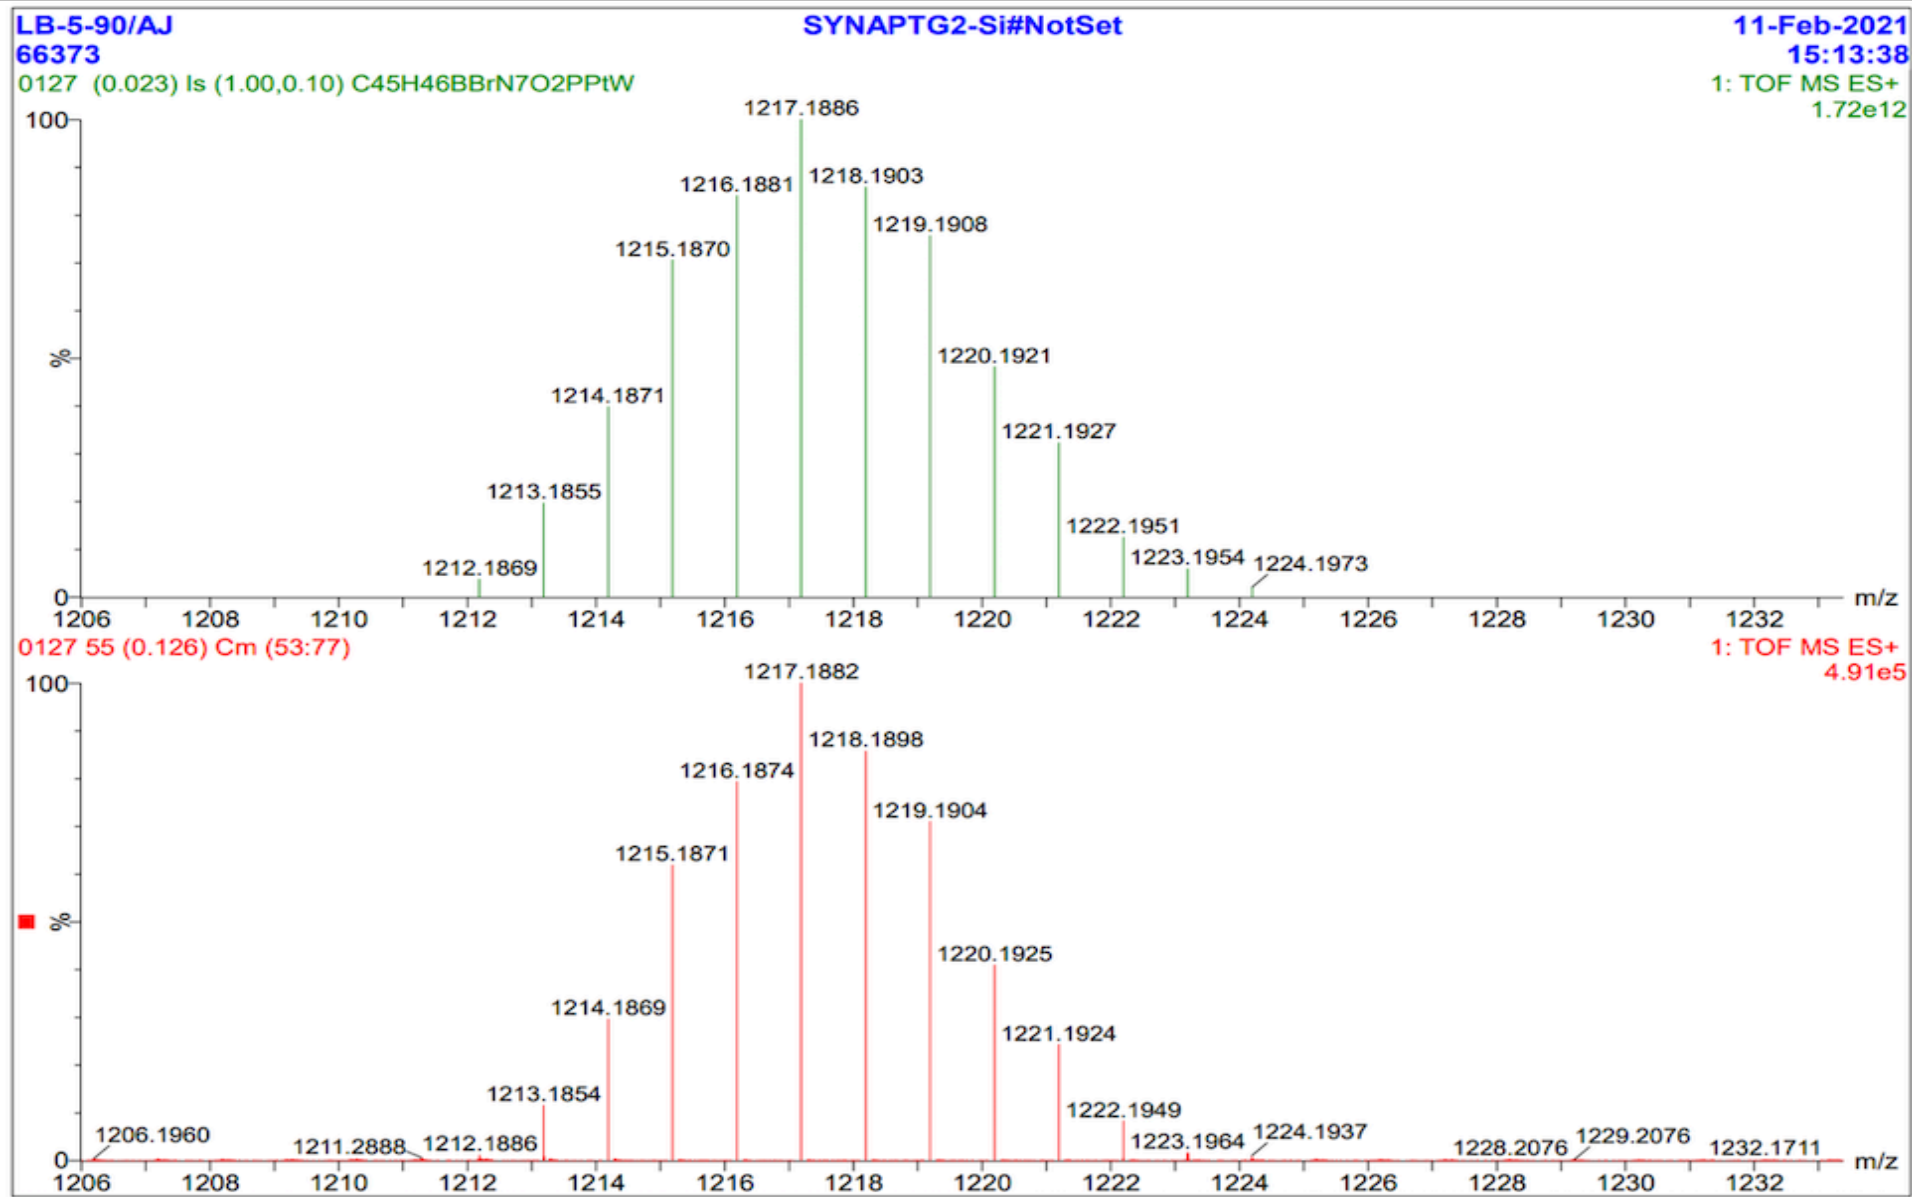

**Figure S24.** ESI Mass Spectrum (Red = measured; green = isotopic simulation) of [WPt( $\mu$ -C)Br(CO)<sub>2</sub>(CNC<sub>6</sub>H<sub>3</sub>Me<sub>2</sub>)(PPh<sub>3</sub>)(Tp\*)] (**3a**).

# SUPPORTING INFORMATION

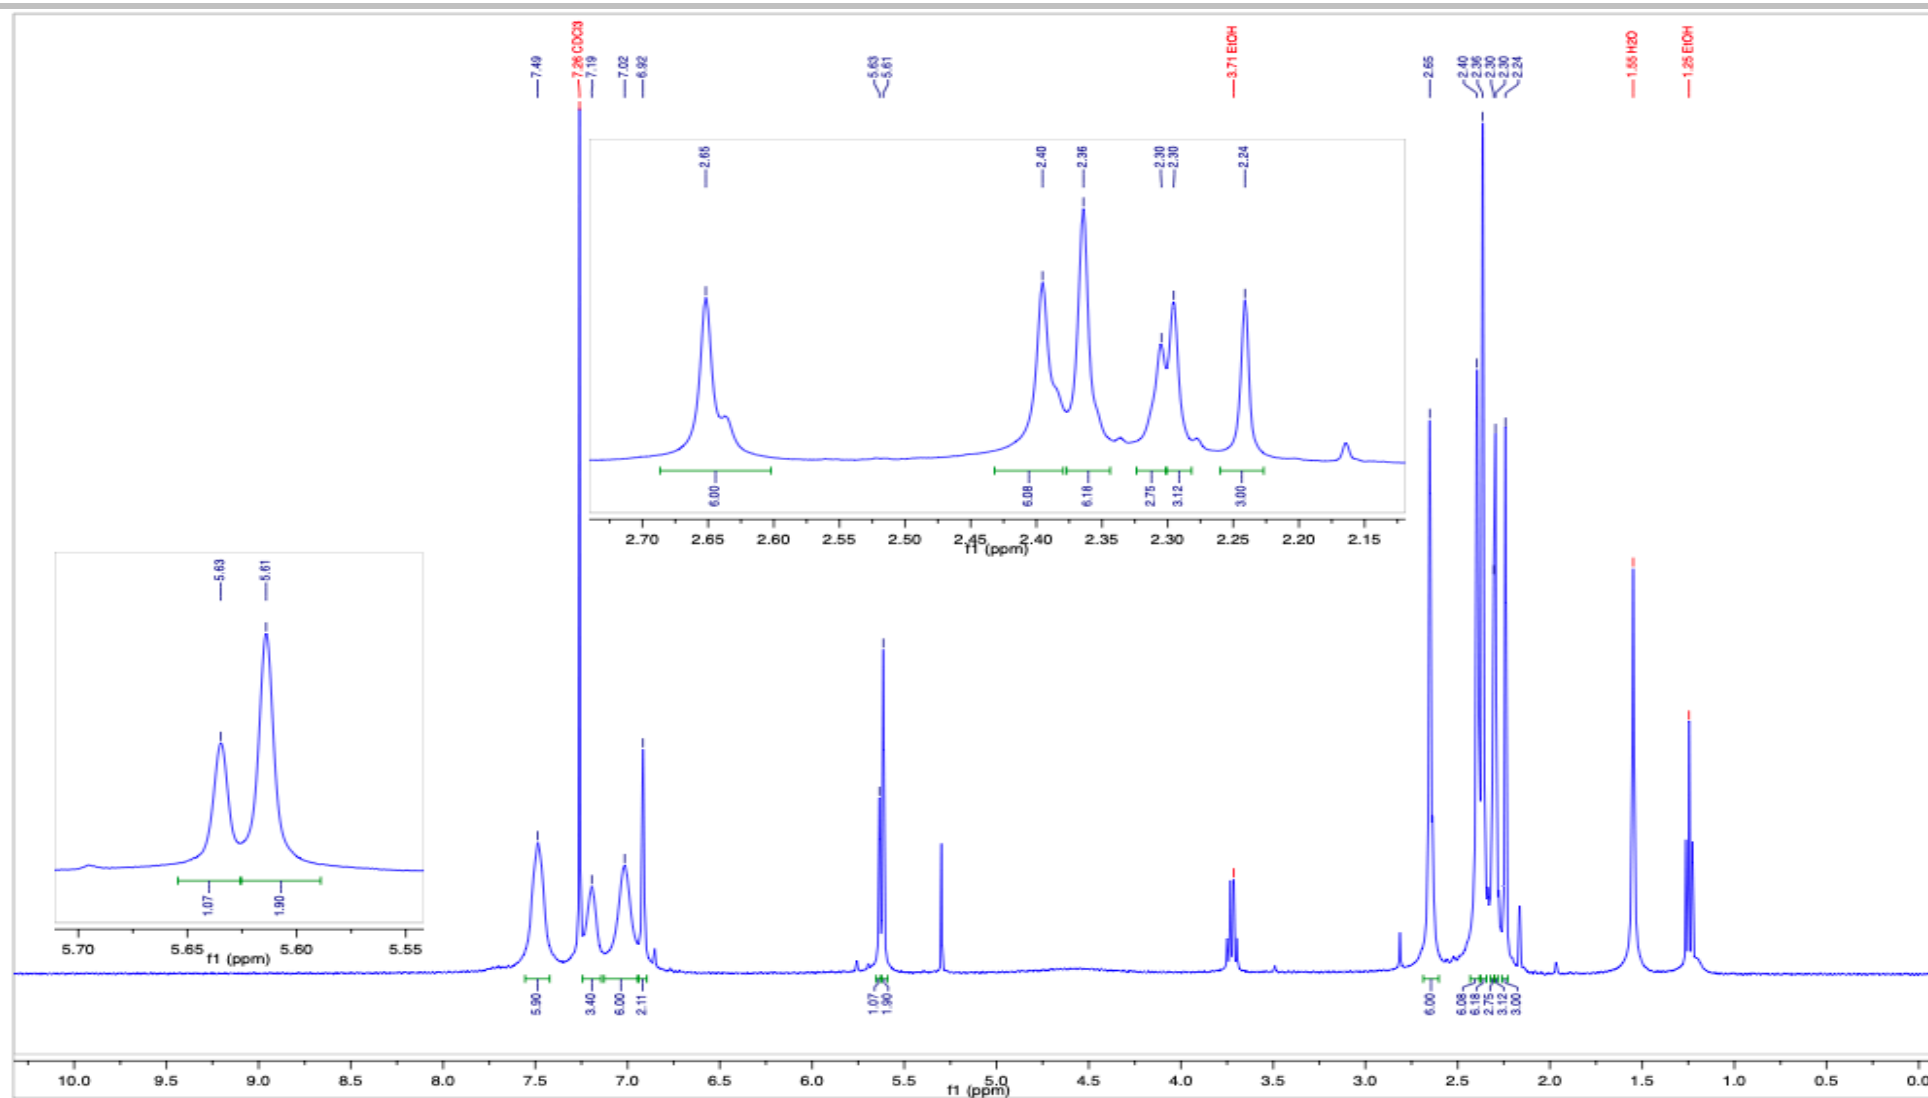

Figure S25. <sup>1</sup>H NMR Spectrum (400 MHz, CDCl<sub>3</sub>, 298 K, δ) of [WPt(μ-C)Br(CO)<sub>2</sub>(CNC<sub>6</sub>H<sub>2</sub>Me<sub>3</sub>)(PPh<sub>3</sub>)(Tp<sup>\*</sup>)] (3b).

# SUPPORTING INFORMATION

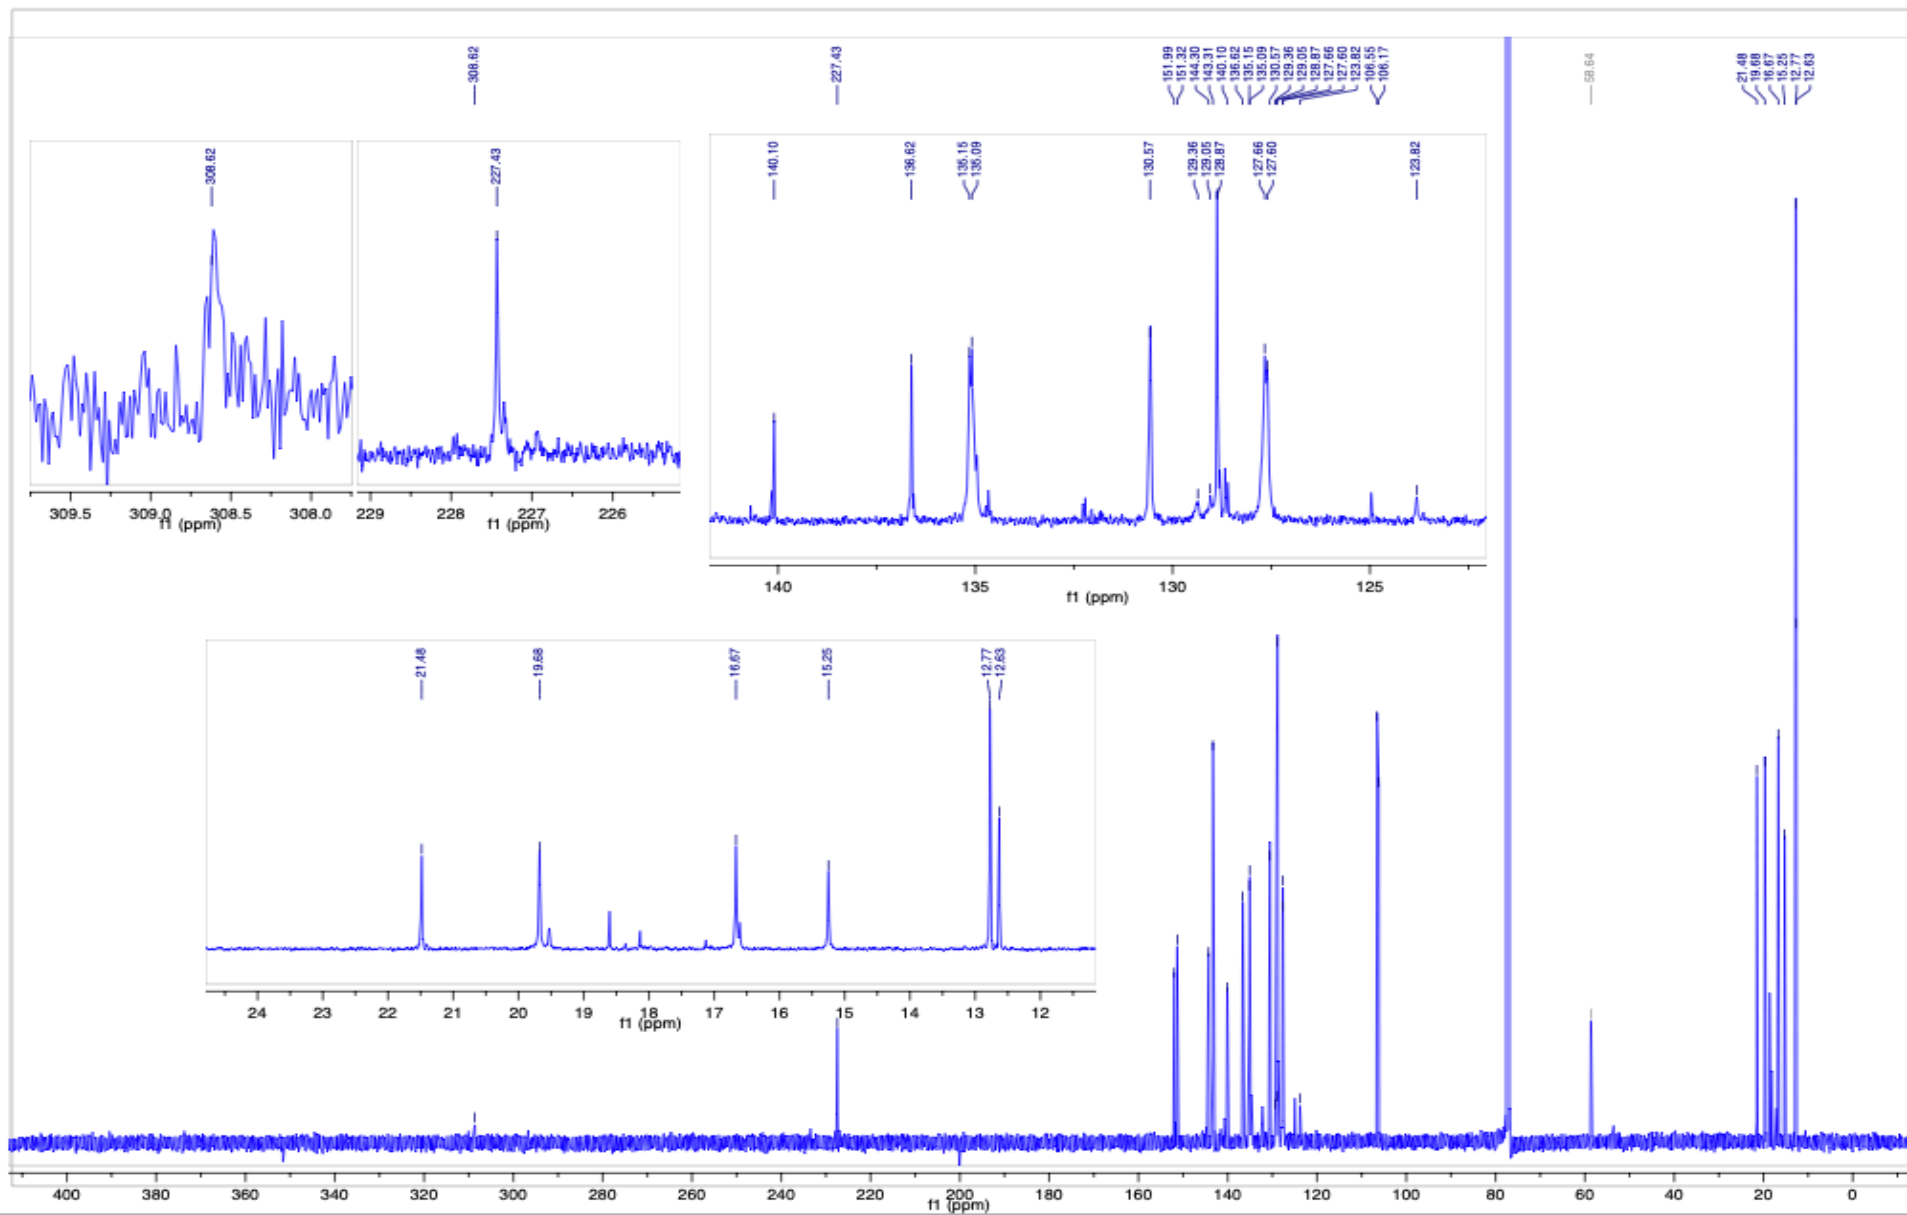

Figure S26.  $^{13}\text{C}\{^1\text{H}\}$  NMR Spectrum (176 MHz,  $\text{CDCl}_3$ , 298 K,  $\delta$ ) of  $[\text{WPt}(\mu\text{-C})\text{Br}(\text{CO})_2(\text{CNC}_6\text{H}_2\text{Me}_3)(\text{PPh}_3)(\text{Tp}^*)]$  (3b).

## SUPPORTING INFORMATION

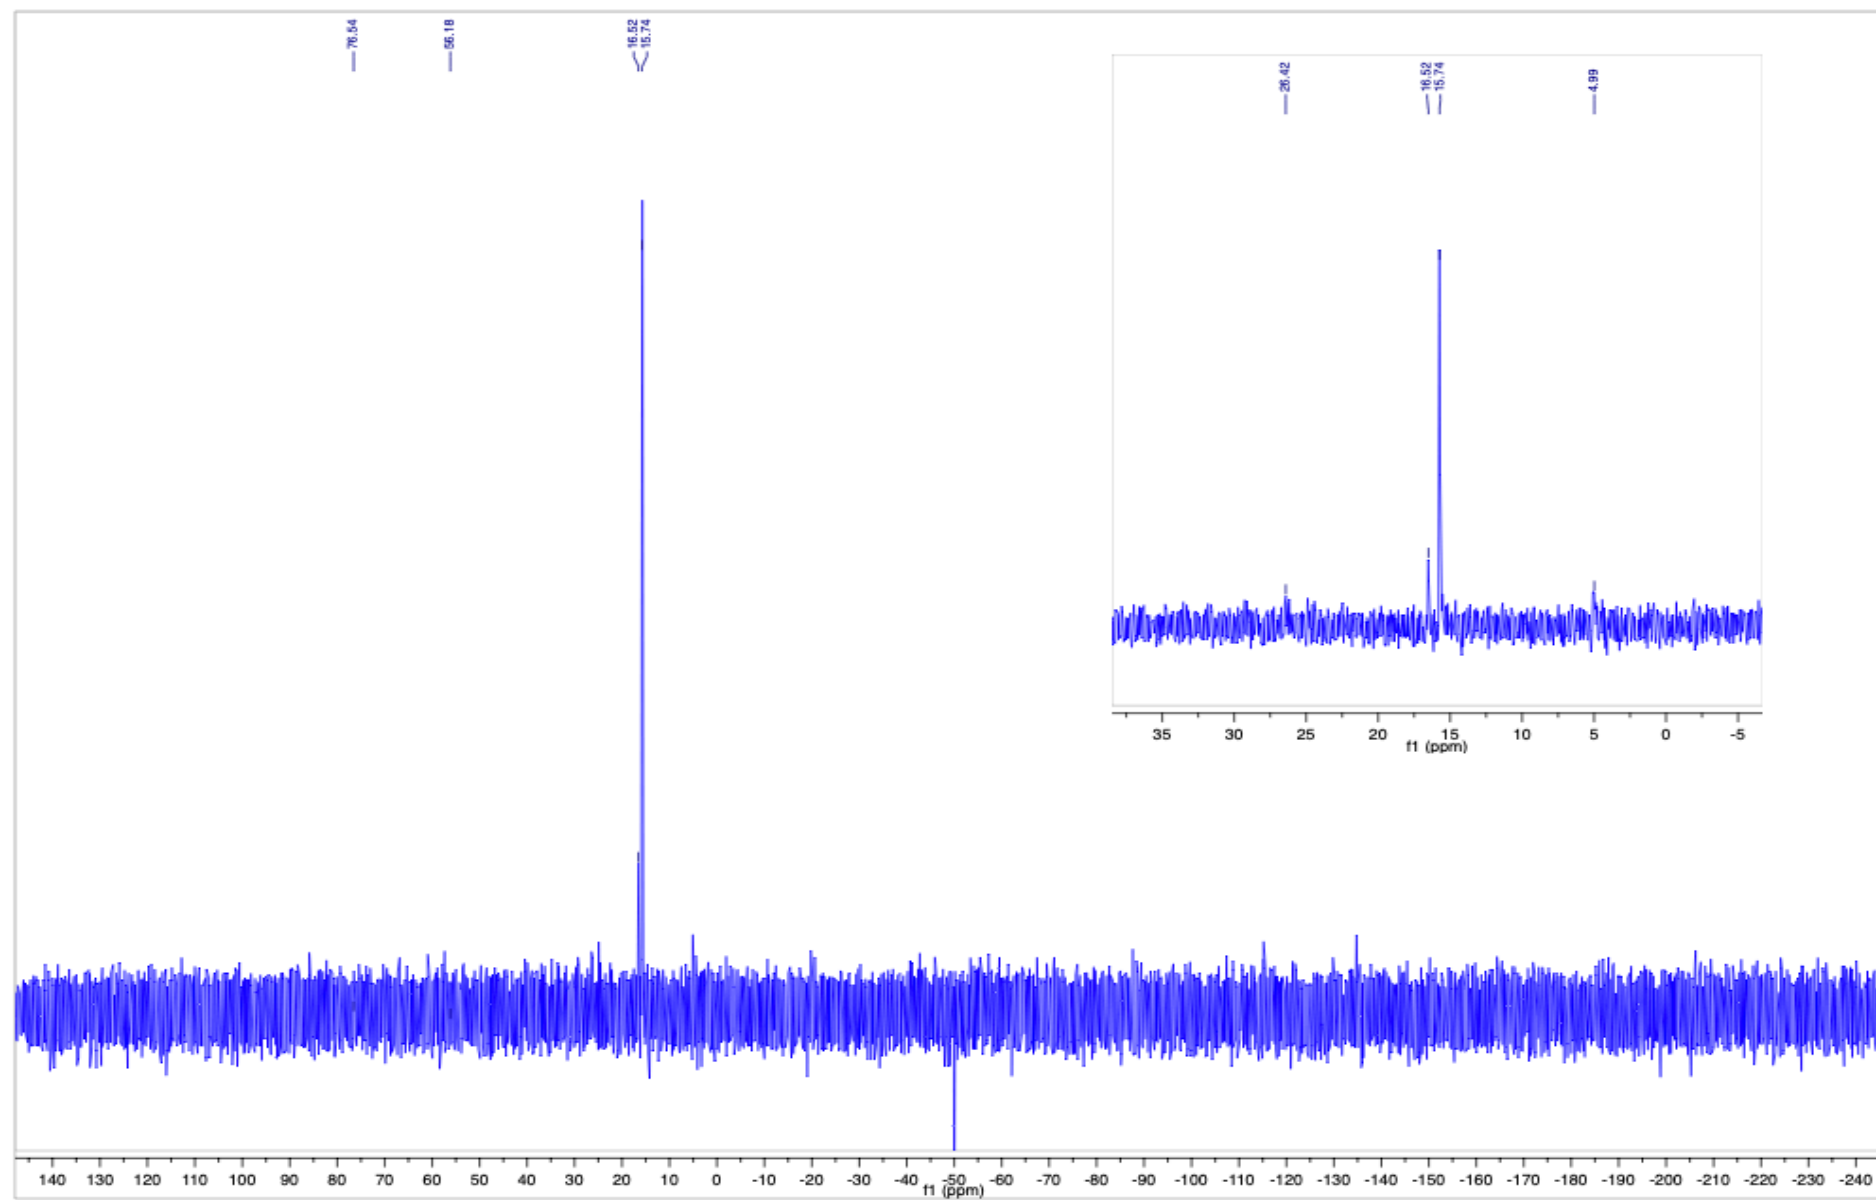

**Figure S27.**  $^{31}\text{P}\{^1\text{H}\}$  NMR Spectrum (162 MHz,  $\text{CDCl}_3$ , 298 K,  $\delta$ ) of  $[\text{WPt}(\mu\text{-C})\text{Br}(\text{CO})_2(\text{CNC}_6\text{H}_2\text{Me}_3)(\text{PPh}_3)(\text{Tp}^*)]$  (**3b**).

## SUPPORTING INFORMATION

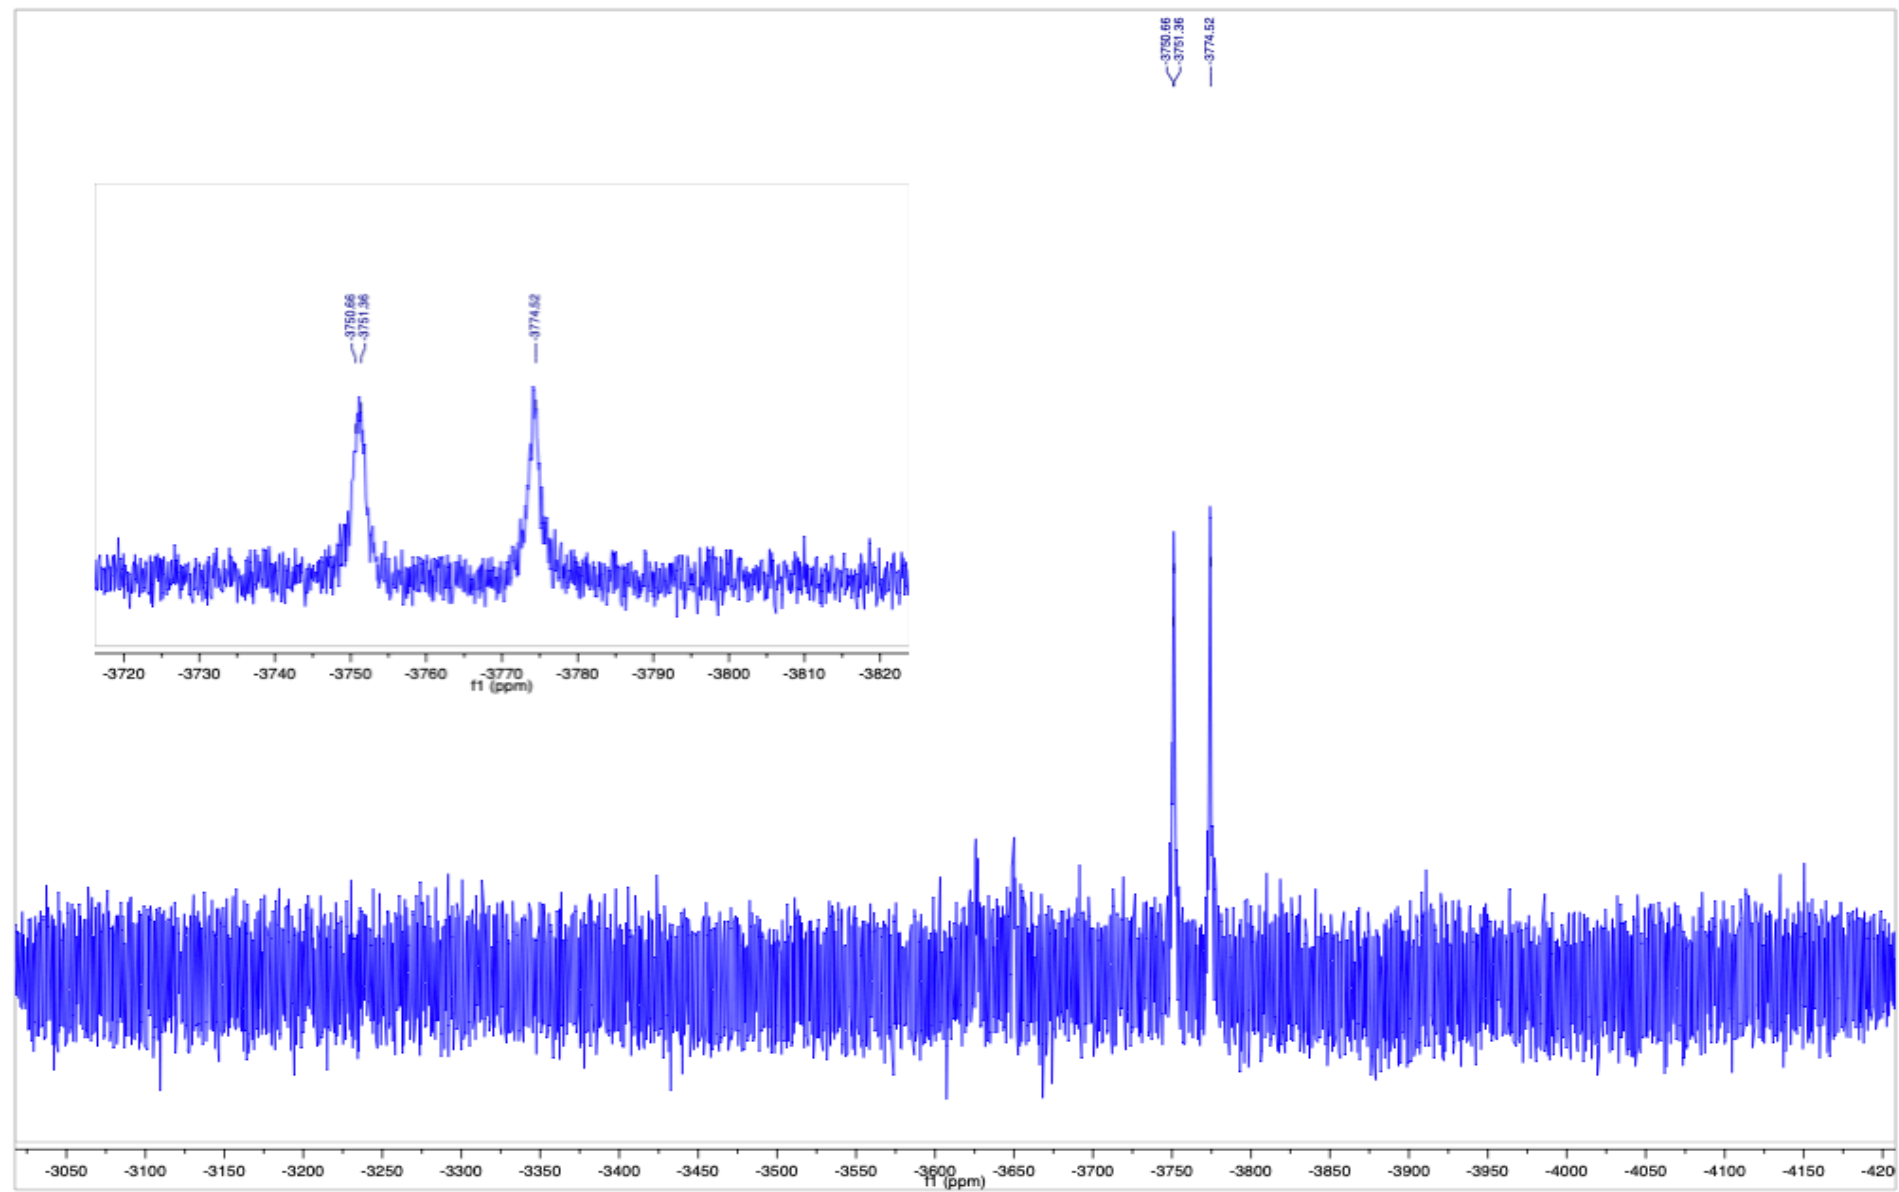

Figure S28.  $^{195}\text{Pt}\{^1\text{H}\}$  NMR Spectrum (149.9 MHz,  $\text{CDCl}_3$ , 298 K,  $\delta$ ) of  $[\text{WPt}(\mu\text{-C})\text{Br}(\text{CO})_2(\text{CNC}_6\text{H}_2\text{Me}_3)(\text{PPh}_3)_2(\text{Tp}^*)]$  (3b)

## SUPPORTING INFORMATION

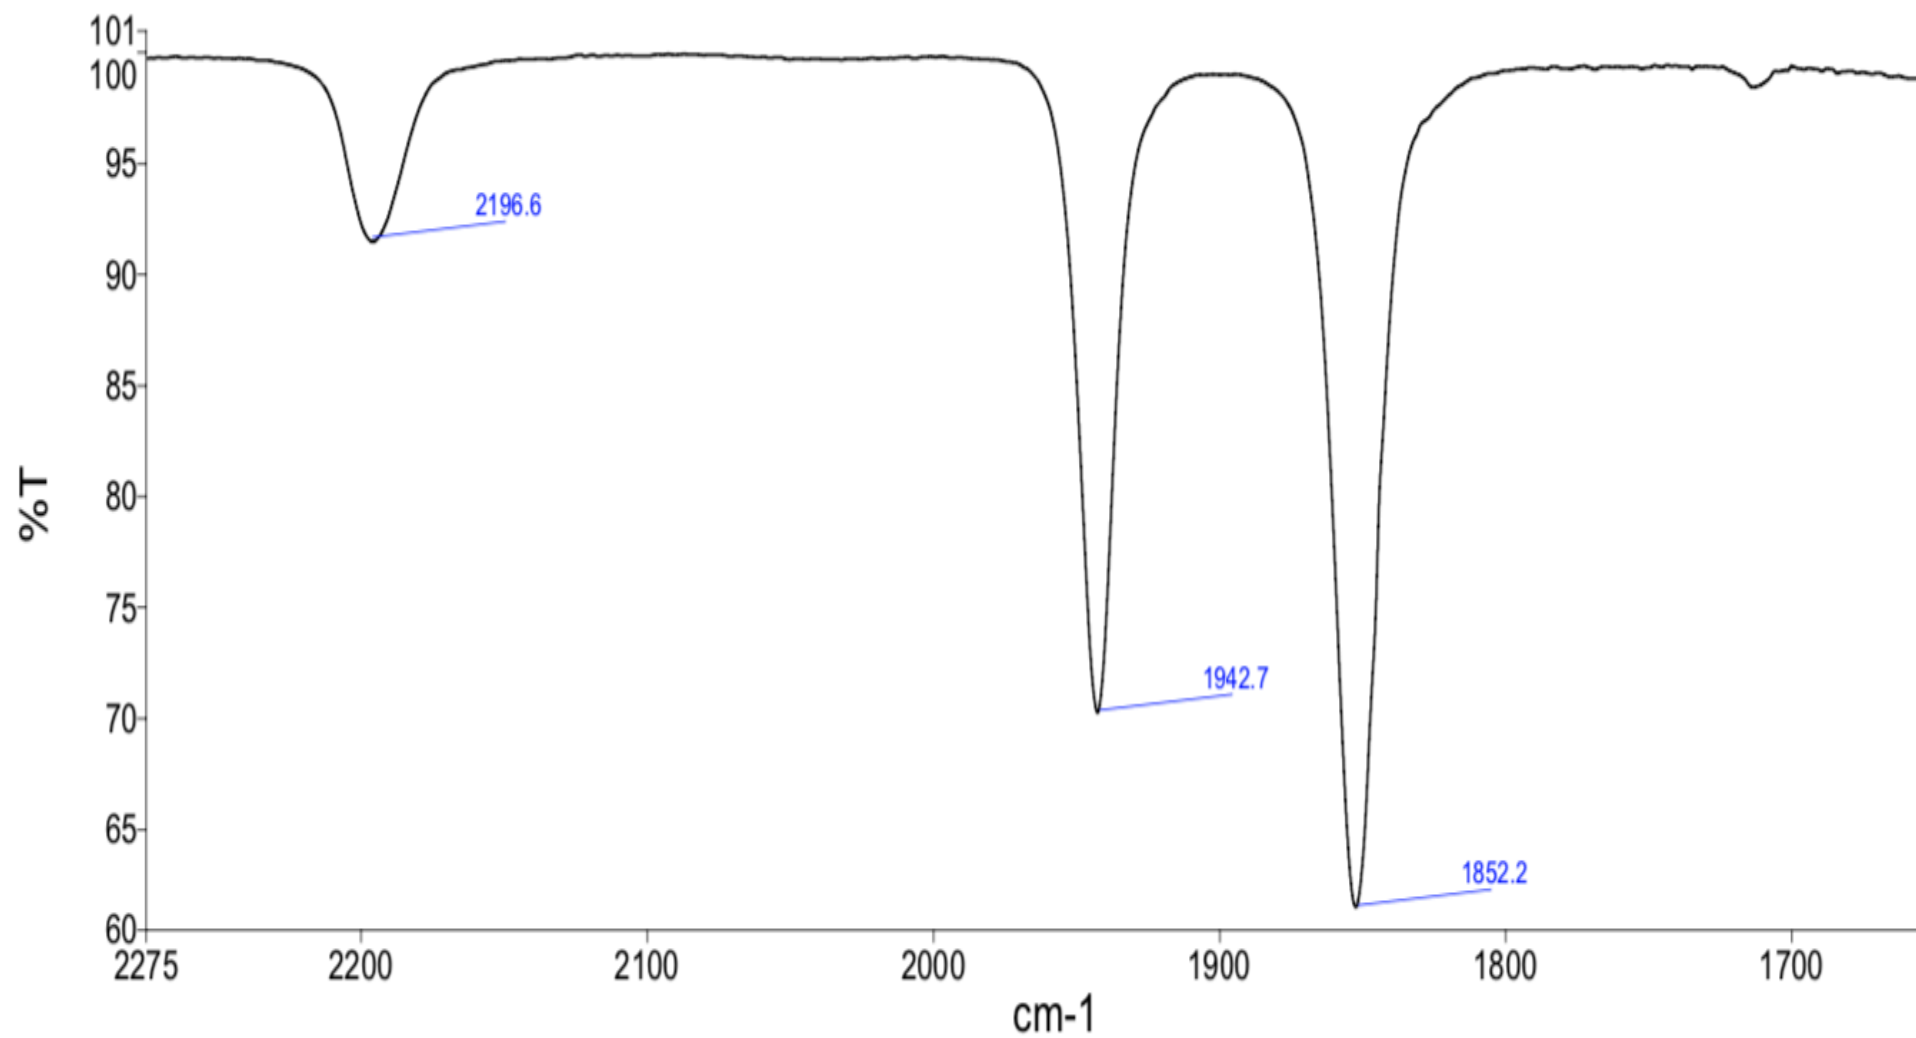

Figure S29. Infrared Spectrum (CH<sub>2</sub>Cl<sub>2</sub>, 298 K, cm<sup>-1</sup>) of [WPt(μ-C)Br(CO)<sub>2</sub>(CNC<sub>6</sub>H<sub>2</sub>Me<sub>3</sub>)(PPh<sub>3</sub>)(Tp\*)] (**3b**)



## SUPPORTING INFORMATION

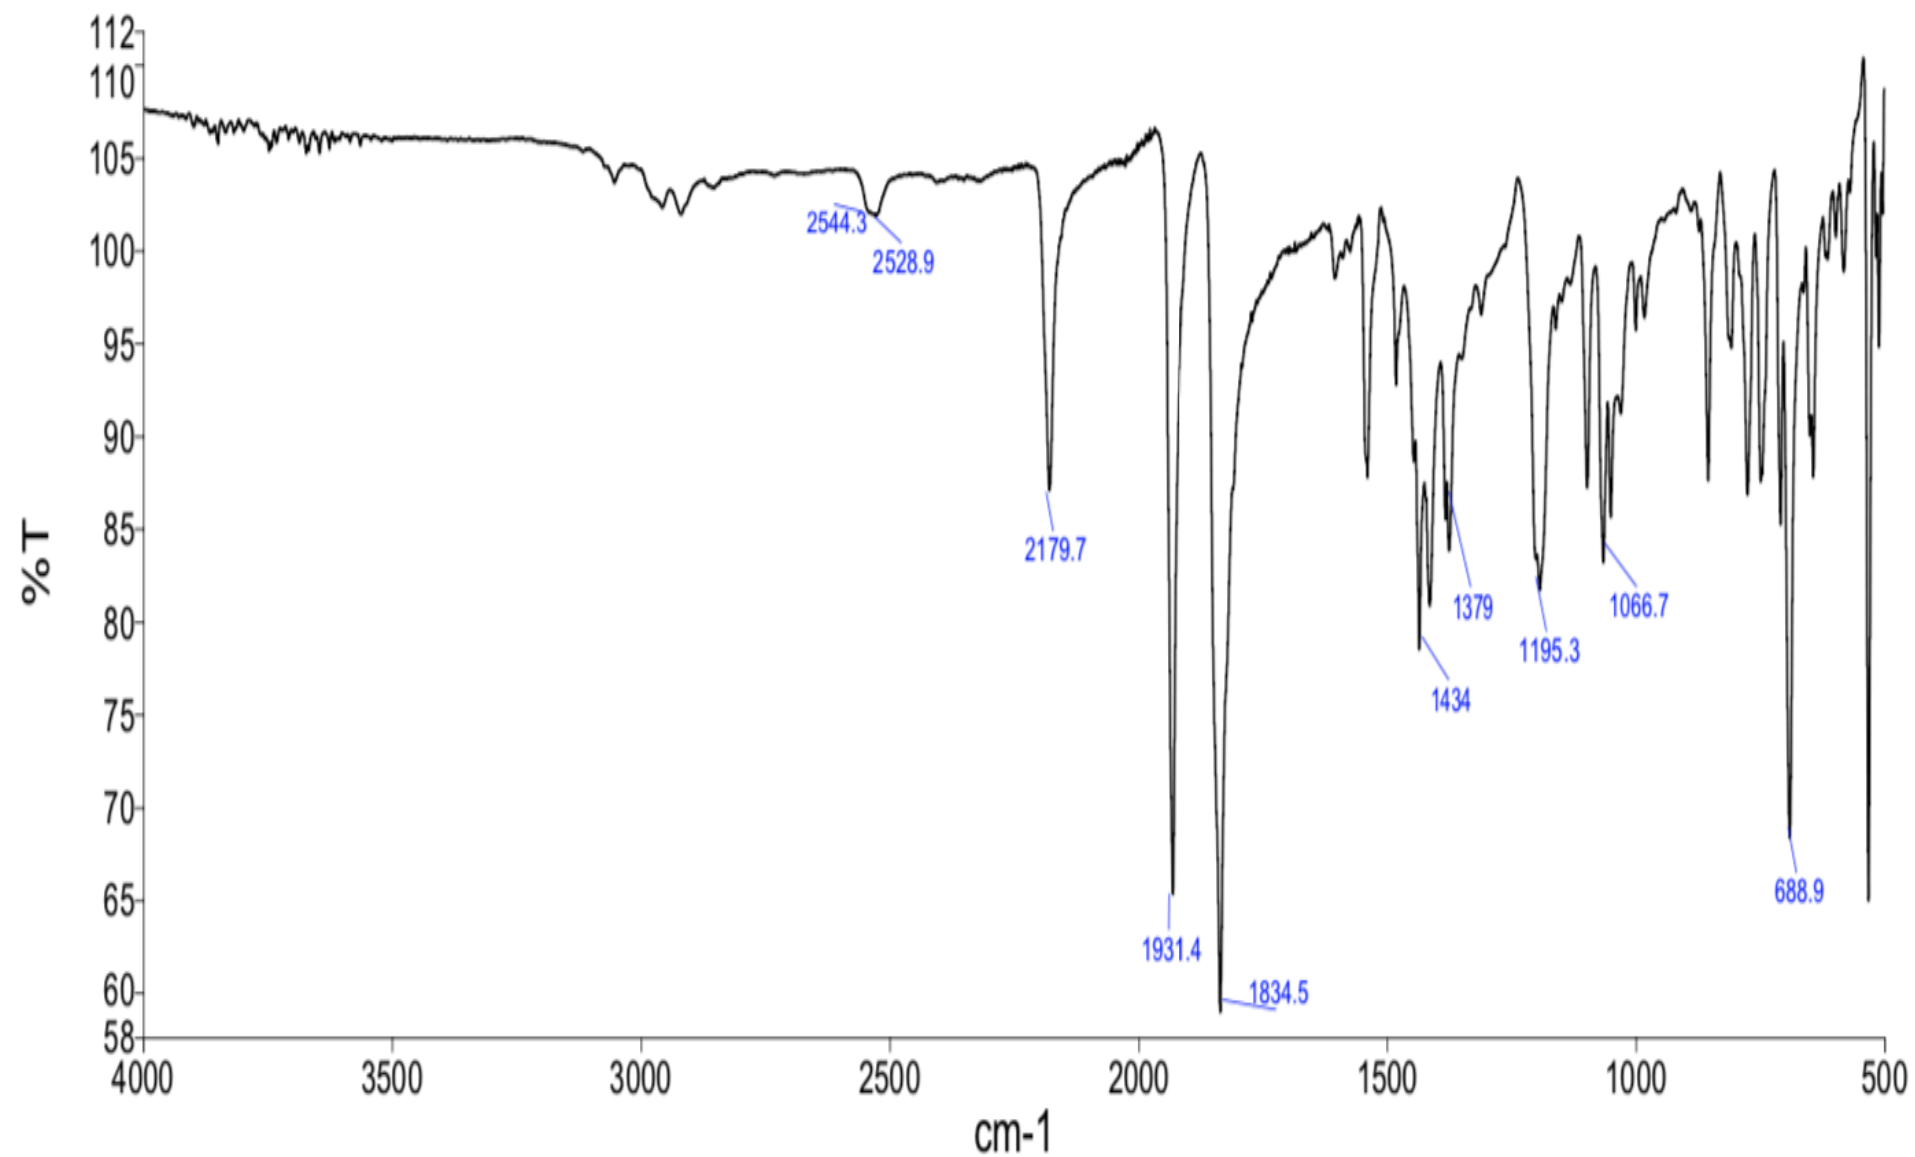

Figure S30. Infrared Spectrum (ATR, Diamond anvil, 298 K, cm<sup>-1</sup>) of [WPt(μ-C)Br(CO)<sub>2</sub>(CNC<sub>6</sub>H<sub>2</sub>Me<sub>3</sub>)(PPh<sub>3</sub>)(Tp\*)] (3b)

## Elemental Composition Report

## Single Mass Analysis

Tolerance = 5.0 PPM / DBE: min = -1.5, max = 30.0

Element prediction: Off

Number of isotope peaks used for i-FIT = 3

Monoisotopic Mass, Even Electron Ions

961 formula(e) evaluated with 1 results within limits (up to 50 closest results for each mass)

Elements Used:

C: 0-50 H: 0-50 11B: 1-1 N: 0-8 O: 0-2 P: 0-1 79Br: 0-1 81Br: 0-1 184W: 0-1 195Pt: 0-1

LB-5-18[2]-MeOH/AJ

21-Oct-2020

10:09:31

66051

0998b 52 (0.132) Cm (45:52)

SYNAPTG2-Si#UGB759

1: TOF MS ES+

4.75e+005

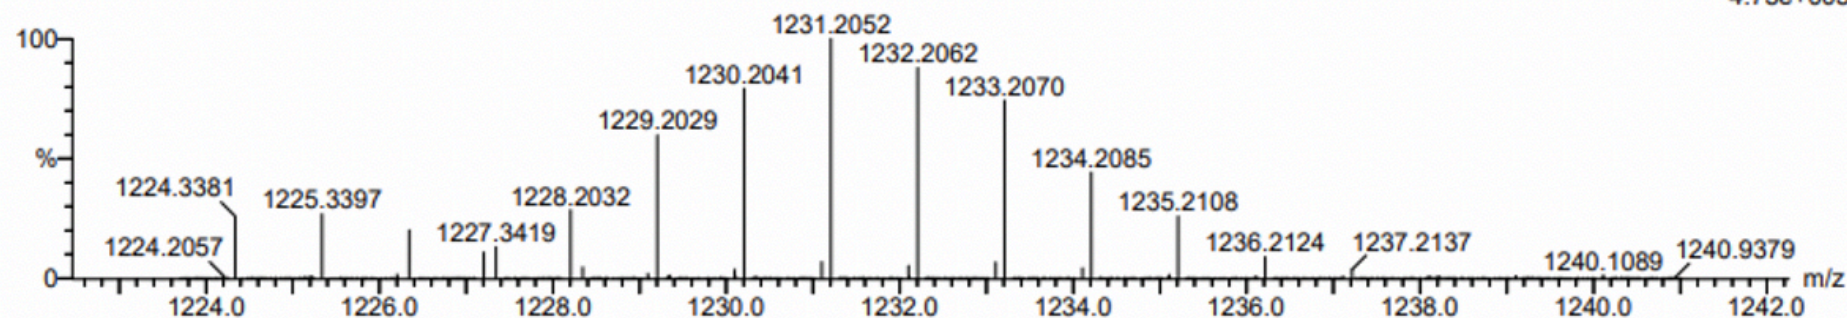

Minimum: -1.5  
 Maximum: 5.0 5.0 30.0

| Mass      | Calc. Mass | mDa | PPM | DBE  | i-FIT  | Norm | Conf (%) | Formula                             |
|-----------|------------|-----|-----|------|--------|------|----------|-------------------------------------|
| 1232.2062 | 1232.2020  | 4.2 | 3.4 | 29.5 | 1059.6 | n/a  | n/a      | C46 H48 11B N7 O2 P 81Br 184W 195Pt |

Figure S31. ESI Mass Spectrum (+ve ion) of [WPt(μ-C)Br(CO)<sub>2</sub>(CNC<sub>6</sub>H<sub>2</sub>Me<sub>3</sub>)(PPh<sub>3</sub>)(Tp<sup>\*</sup>)] (3b)

# SUPPORTING INFORMATION

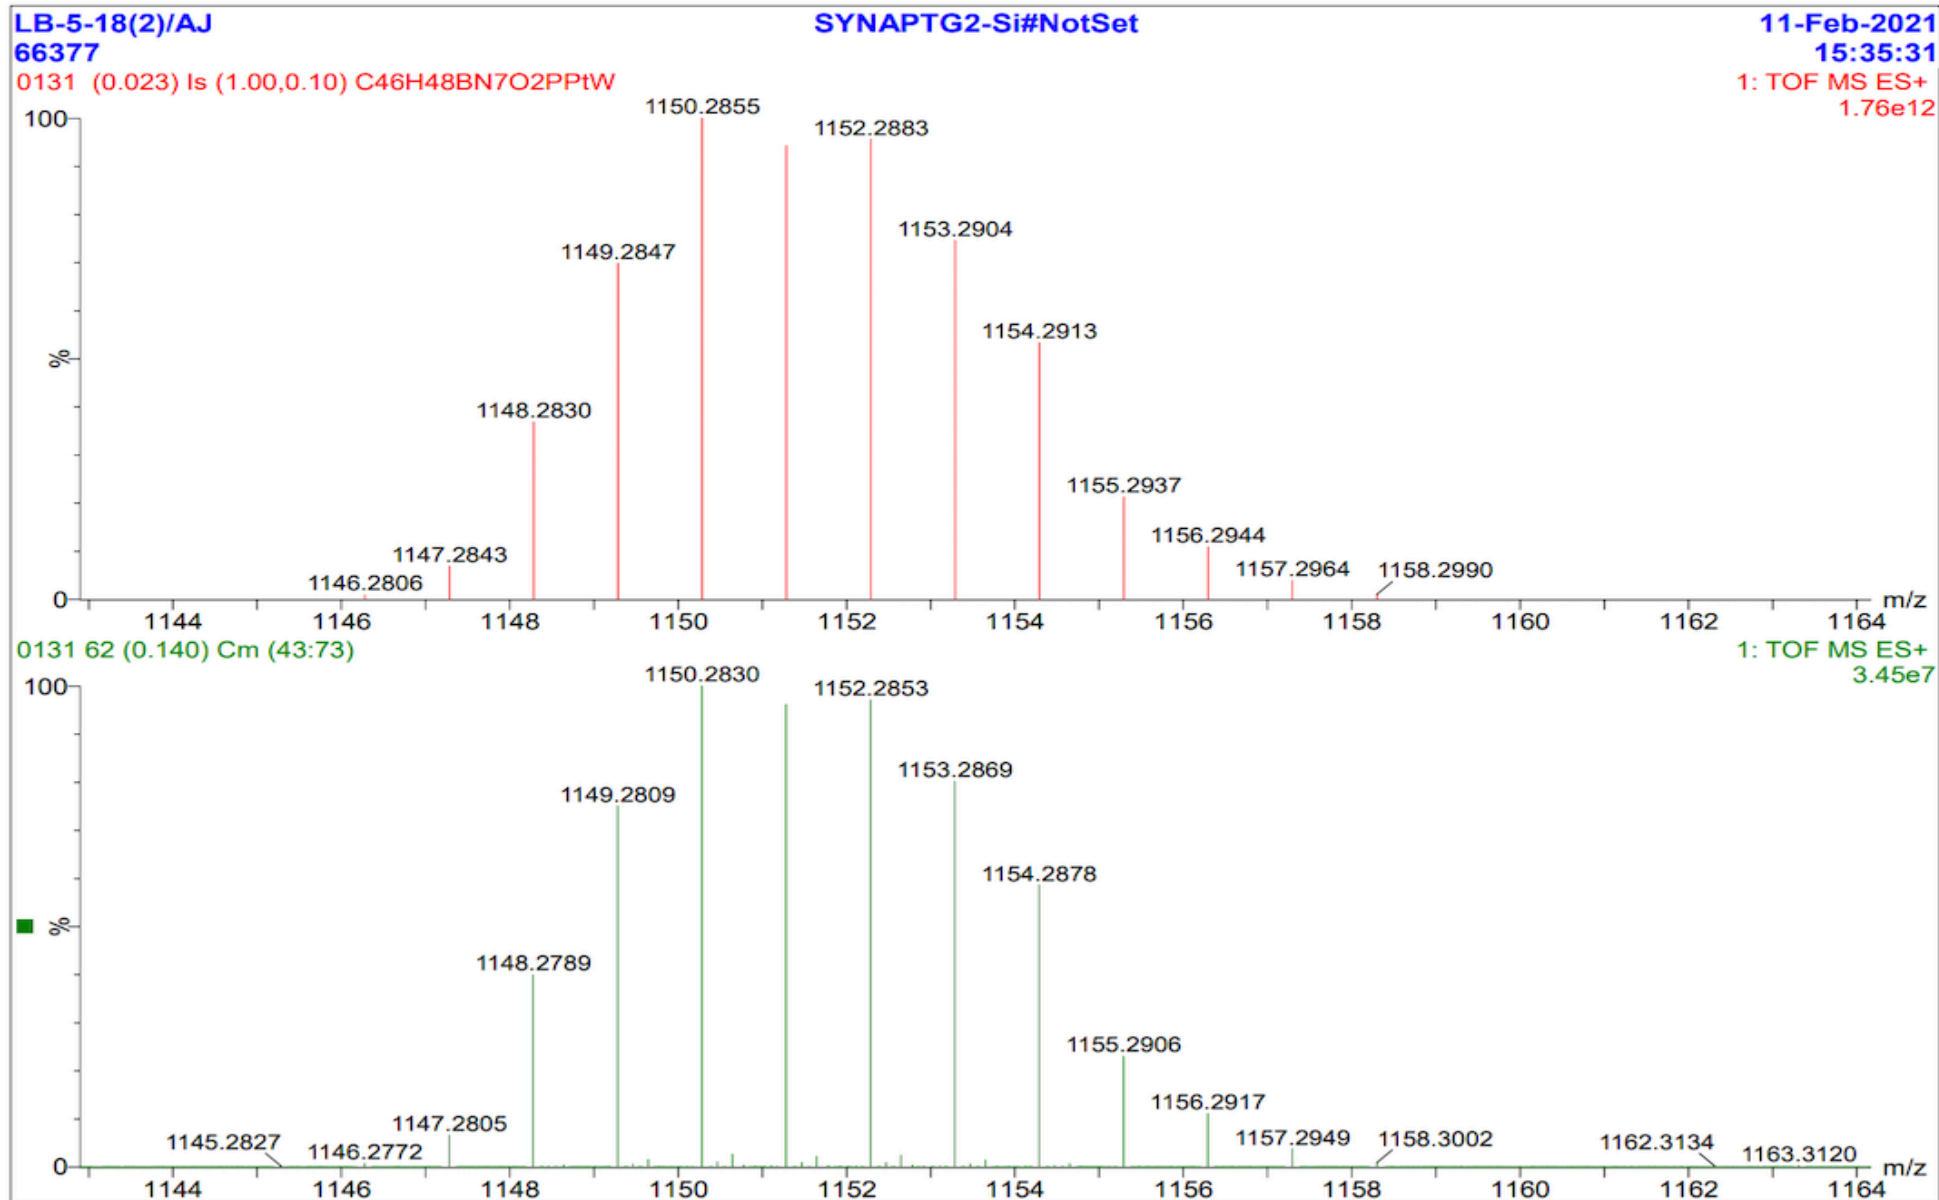

**Figure S32.** ESI Mass Spectrum (Red = measured; green = isotopic simulation) of [WPt( $\mu$ -C)Br(CO)<sub>2</sub>(CNC<sub>6</sub>H<sub>2</sub>Me<sub>3</sub>)(PPh<sub>3</sub>)(Tp<sup>\*</sup>)] (**3b**)

# SUPPORTING INFORMATION

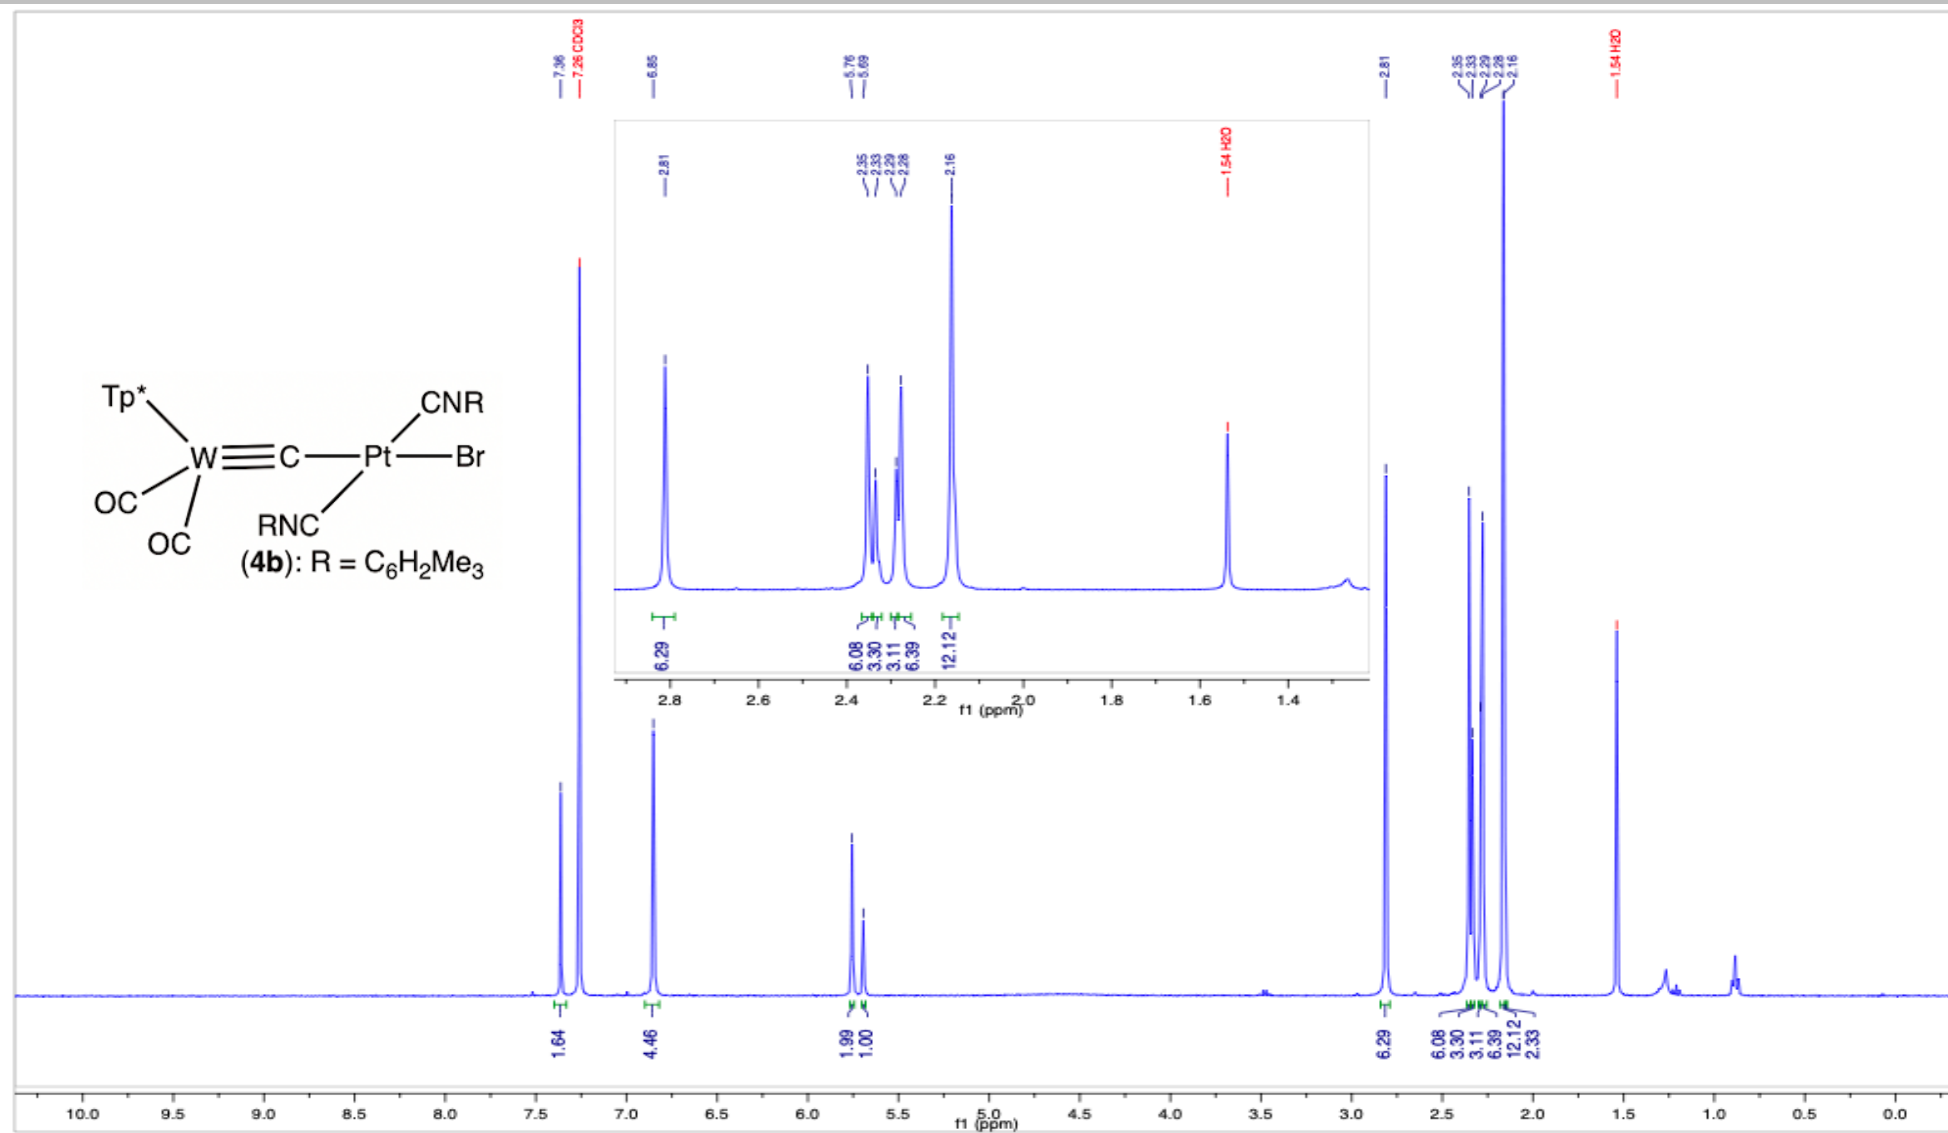

# SUPPORTING INFORMATION

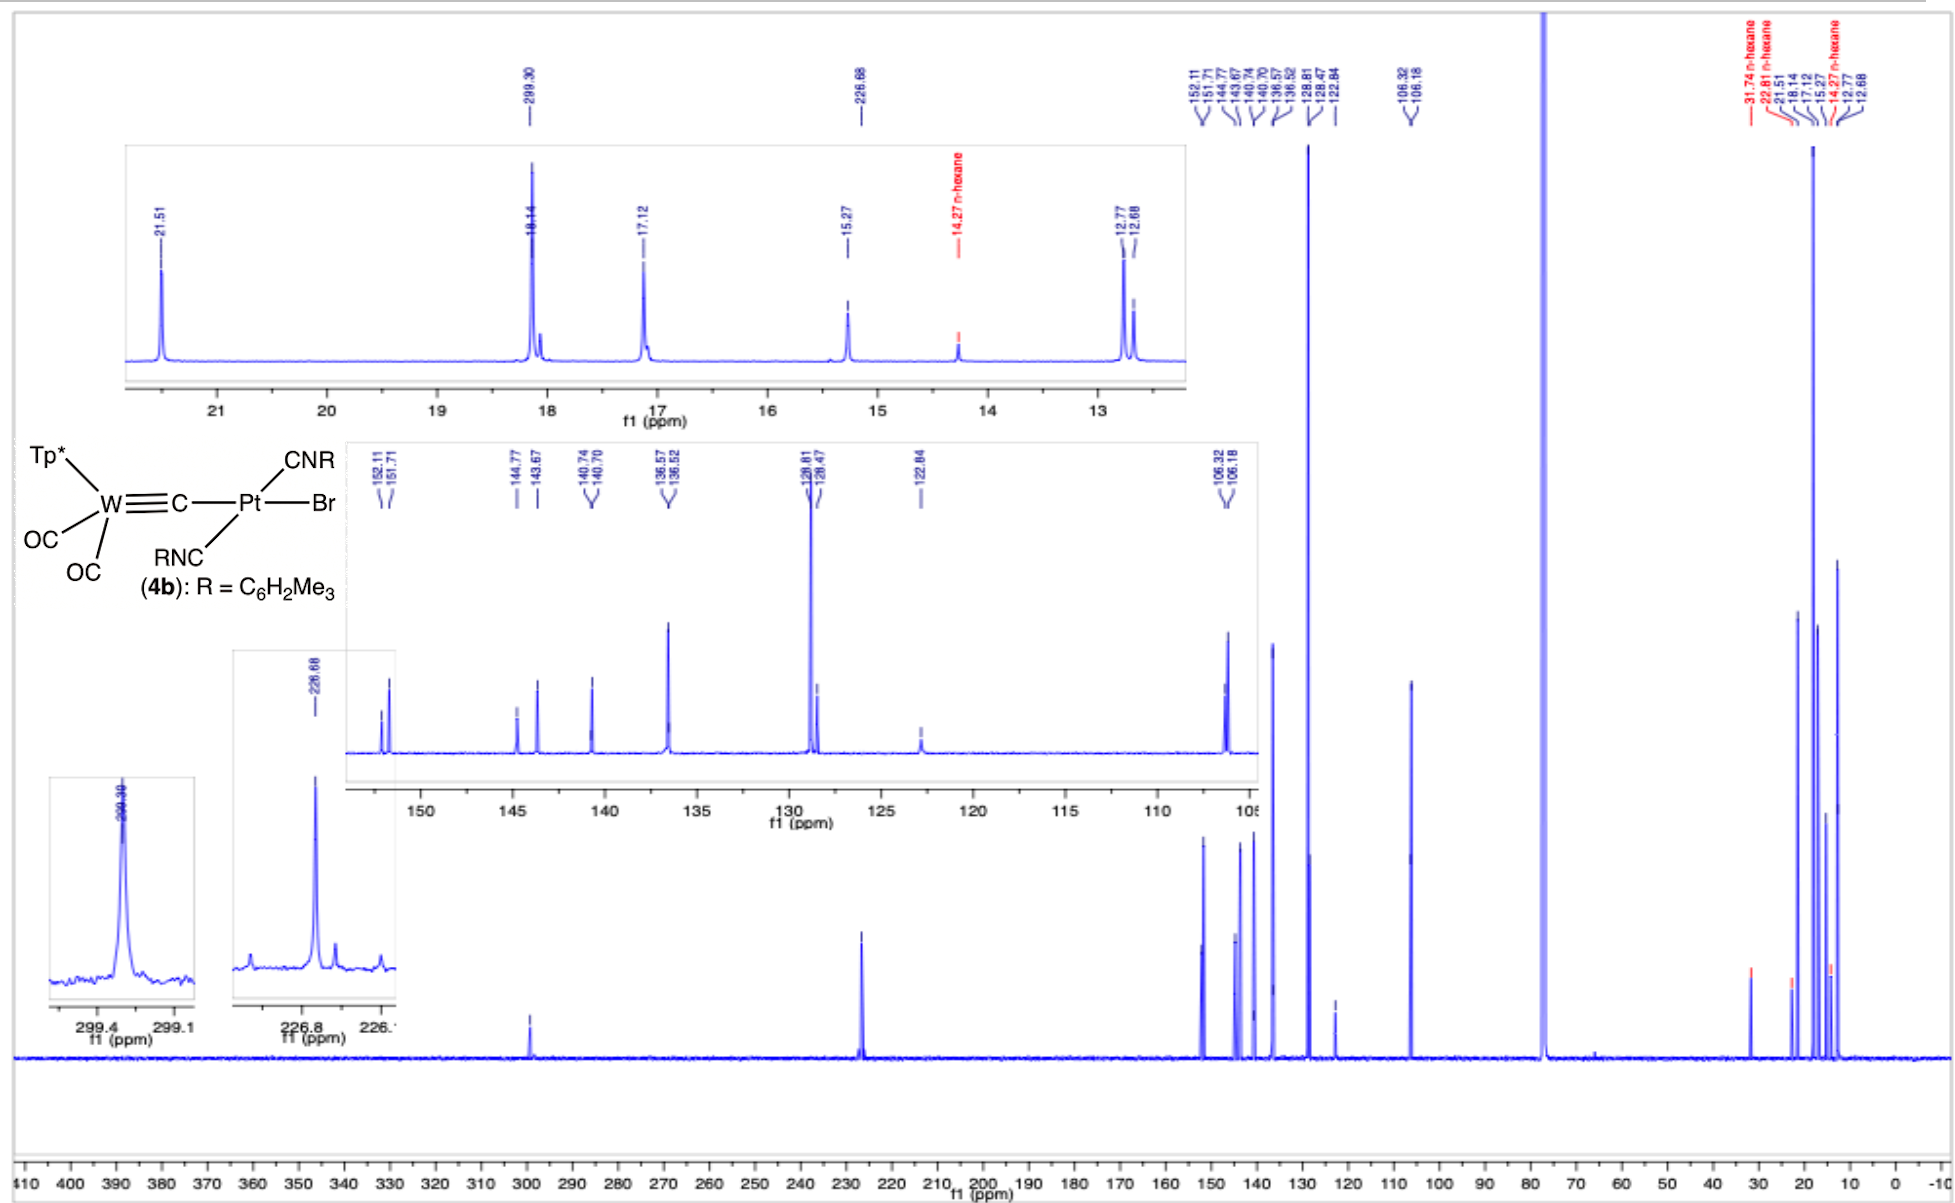

**Figure S34.**  $^{13}\text{C}\{^1\text{H}\}$  NMR Spectrum (151 MHz,  $\text{CDCl}_3$ , 298 K,  $\delta$ ) of  $[\text{W}(\mu\text{-C})\text{Br}(\text{CO})_2(\text{CNC}_6\text{H}_2\text{Me}_3)_2(\text{Tp}^*)]$  (**4b**).

## SUPPORTING INFORMATION

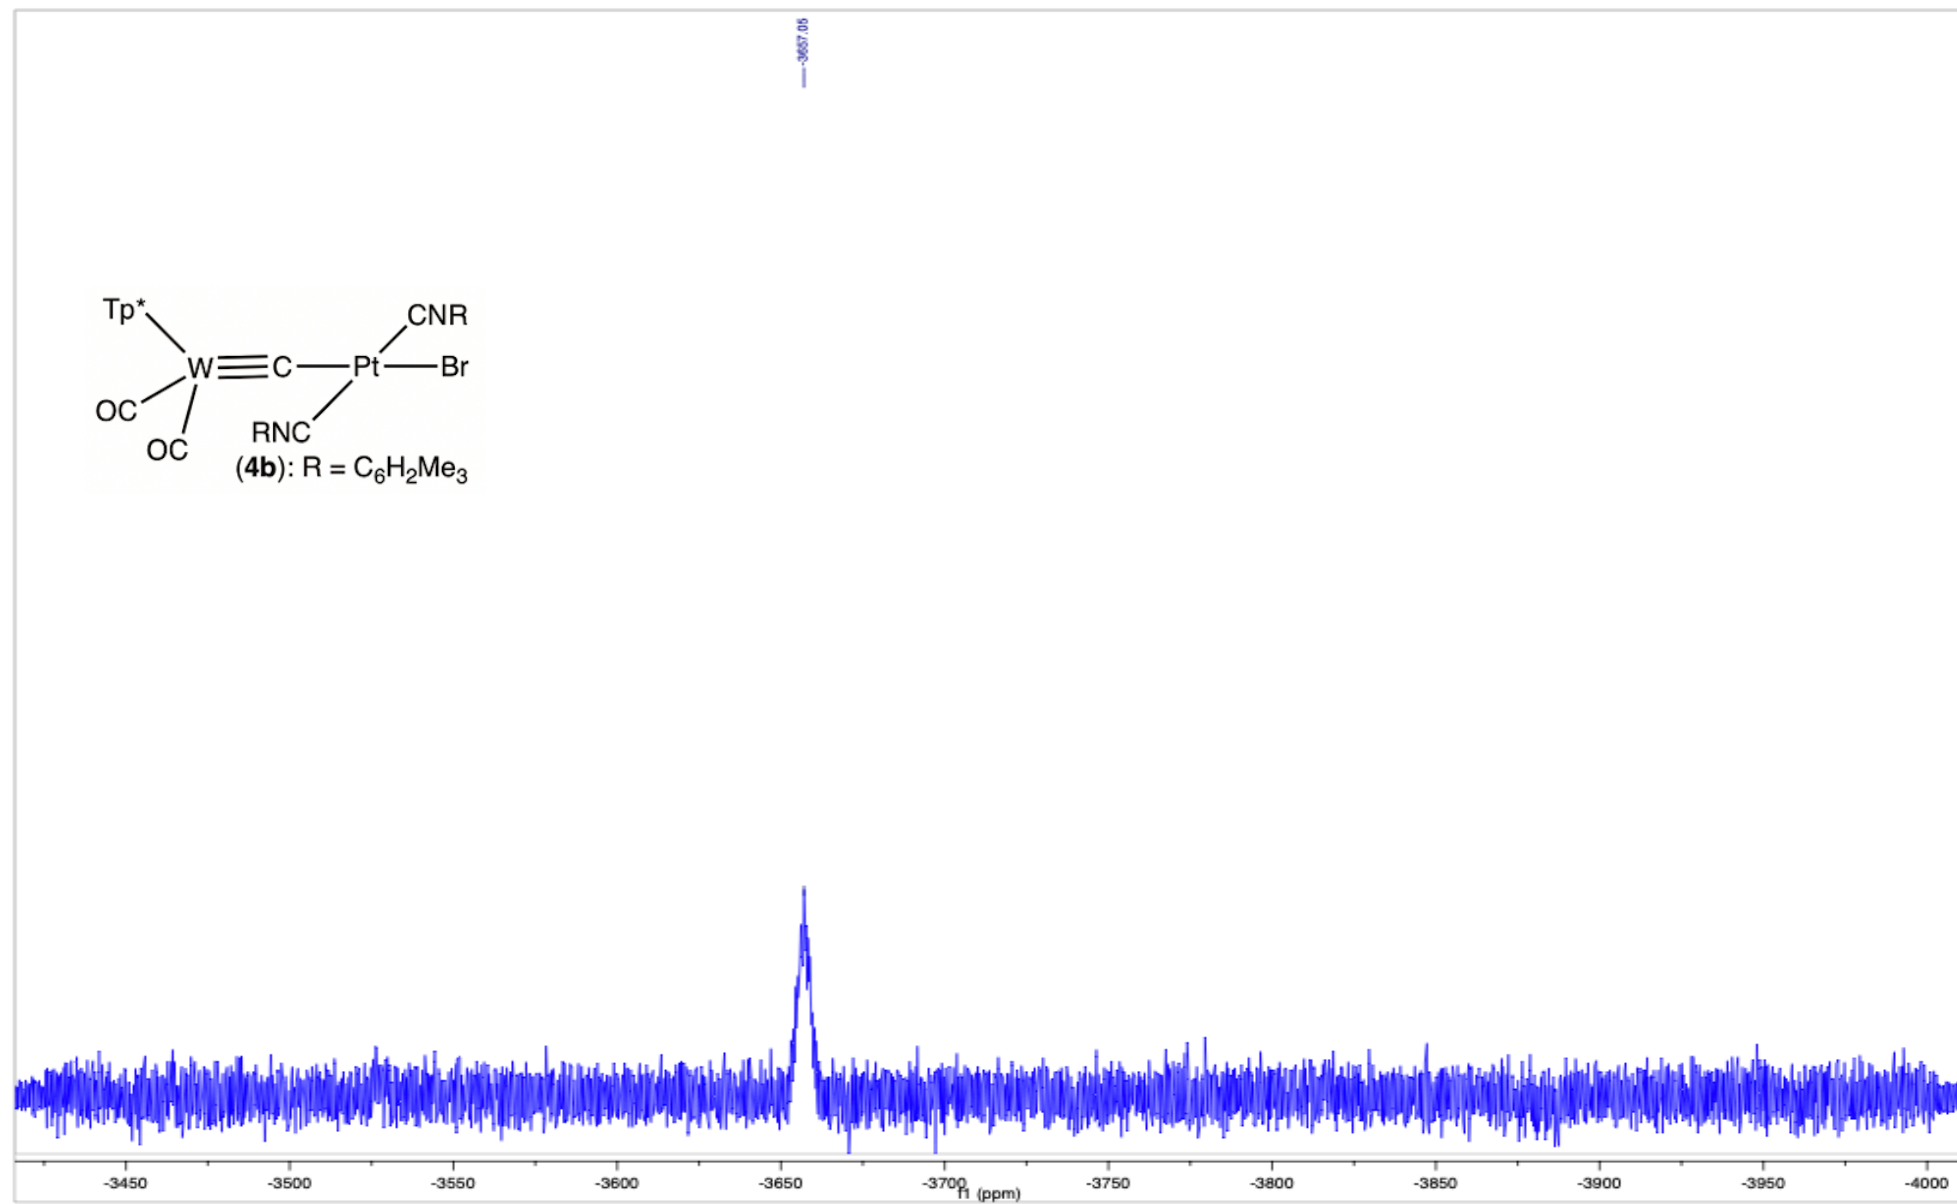

**Figure S35.**  $^{195}\text{Pt}\{^1\text{H}\}$  NMR Spectrum (85.7 MHz,  $\text{CDCl}_3$ , 298 K,  $\delta$ ) of  $[\text{WPt}(\mu\text{-C})\text{Br}(\text{CO})_2(\text{CNC}_6\text{H}_2\text{Me}_3)_2(\text{Tp}^*)]$  (**4b**).

## SUPPORTING INFORMATION

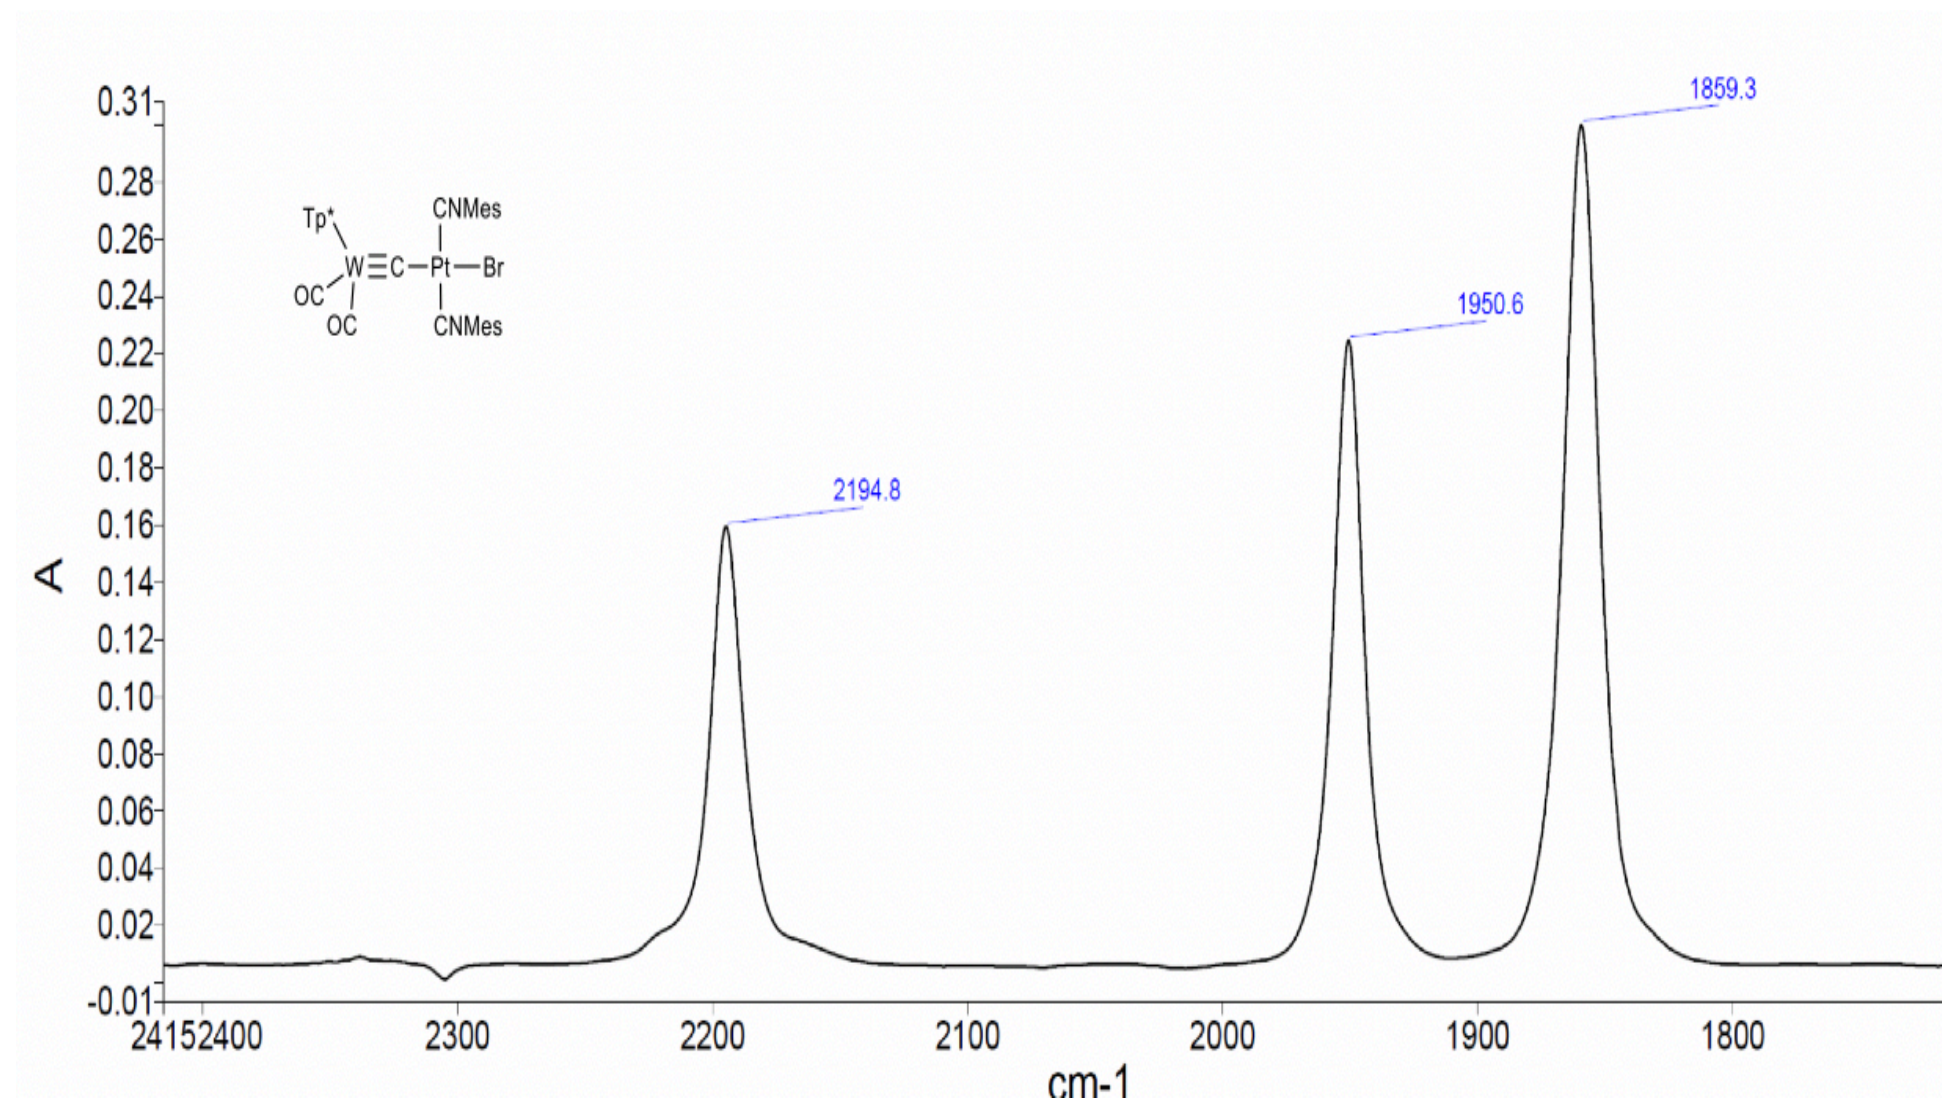

Figure S36. Infrared Spectrum (CH<sub>2</sub>Cl<sub>2</sub>, 298 K, cm<sup>-1</sup>) of [WPt(μ-C)Br(CO)<sub>2</sub>(CNC<sub>6</sub>H<sub>2</sub>Me<sub>3</sub>)<sub>2</sub>(Tp\*)] (**4b**)

## SUPPORTING INFORMATION

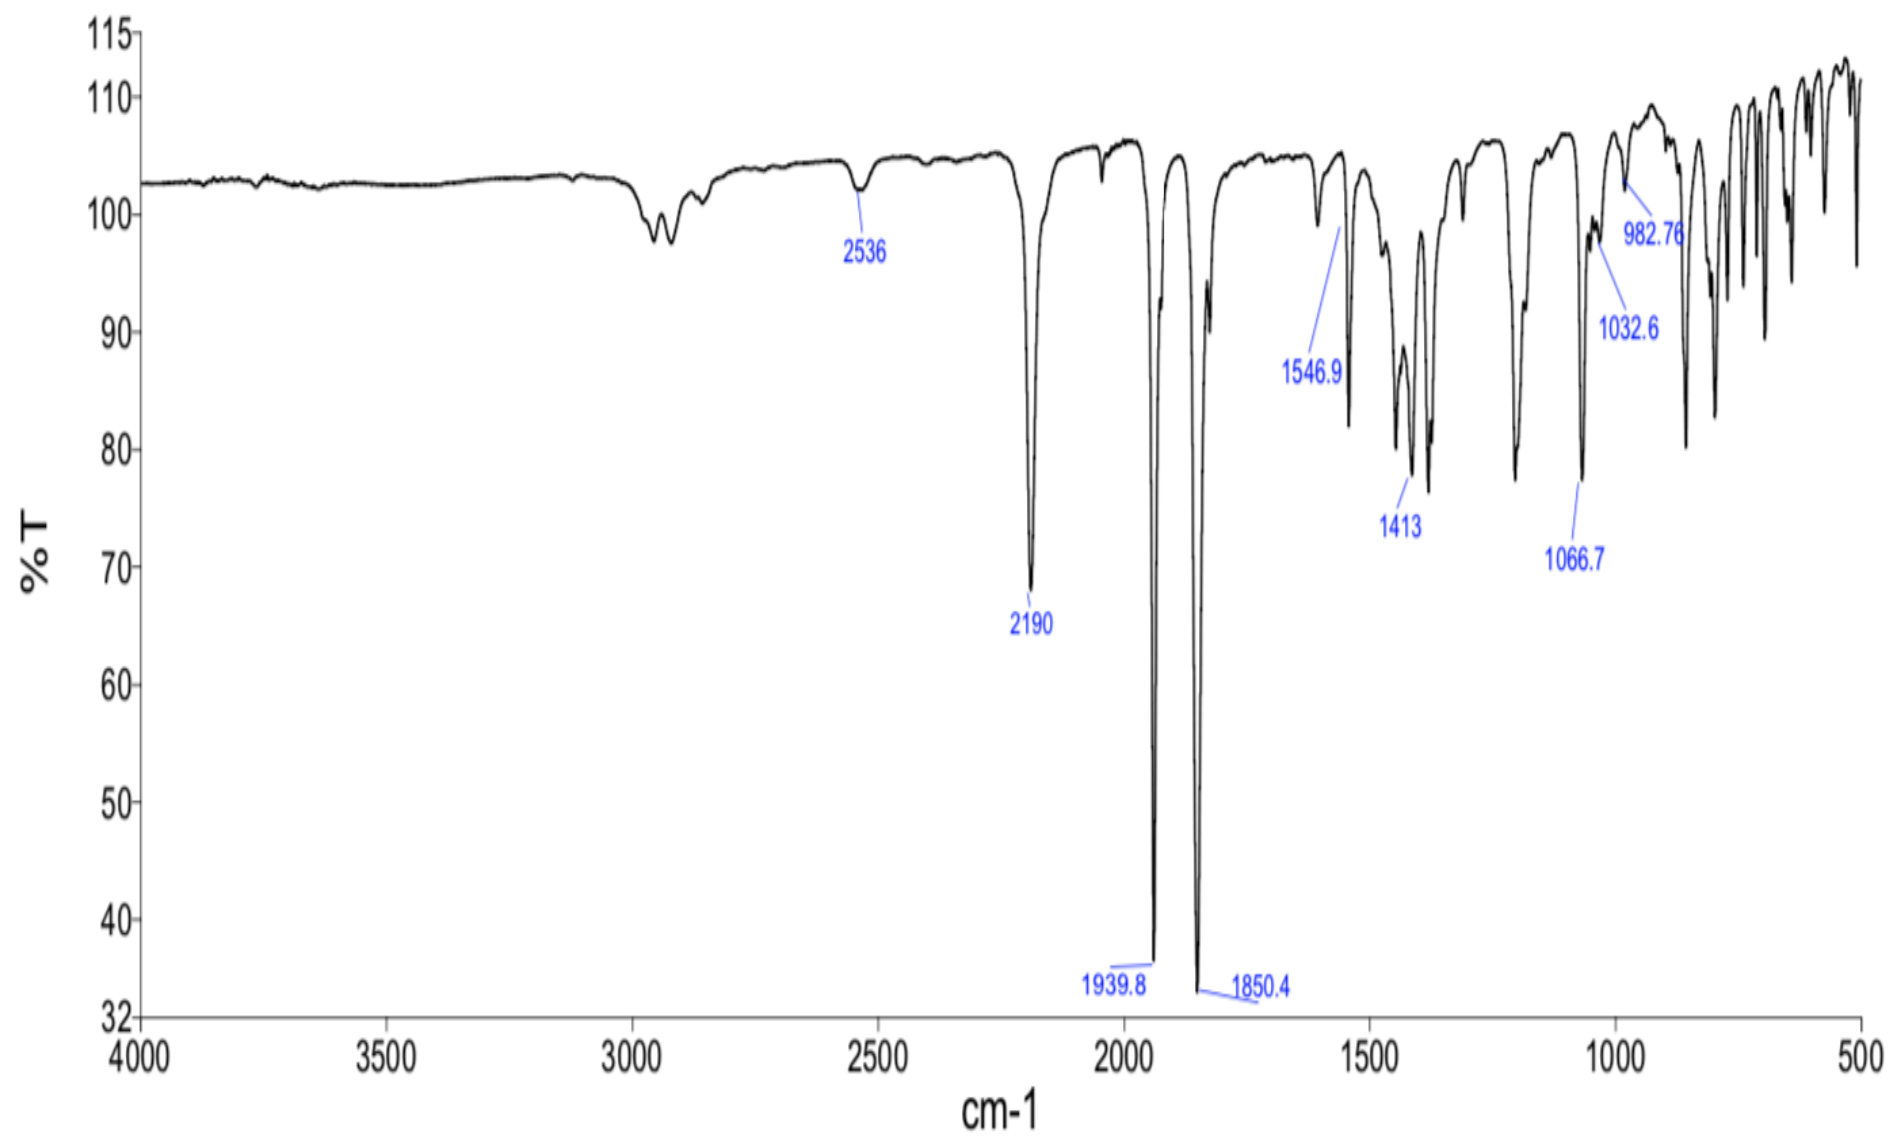

Figure S37. Infrared Spectrum (ATR, diamond anvil, 298 K, cm<sup>-1</sup>) of [WPt(μ-C)Br(CO)<sub>2</sub>(CNC<sub>6</sub>H<sub>2</sub>Me<sub>3</sub>)<sub>2</sub>(Tp\*)] (**4b**)



# SUPPORTING INFORMATION

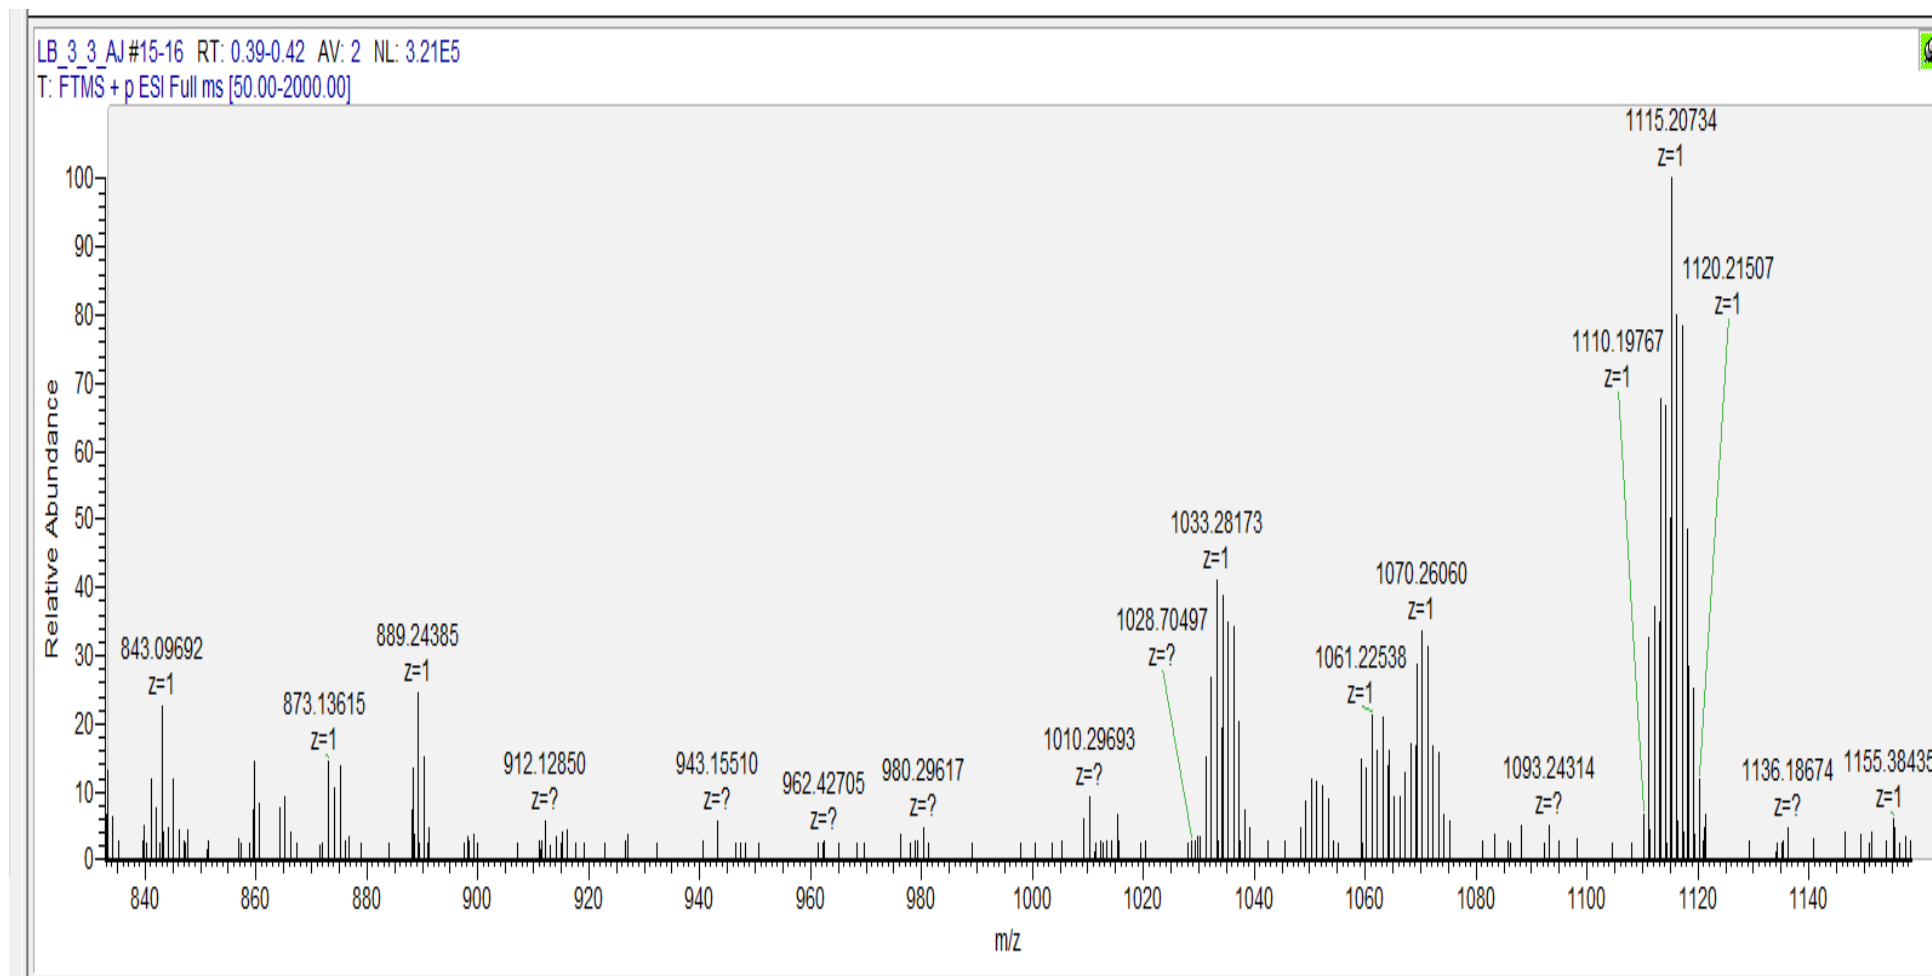

Figure S38. ESI Mass Spectrum (+ve ion) of  $[\text{WPt}(\mu\text{-C})\text{Br}(\text{CO})_2(\text{CNC}_6\text{H}_2\text{Me}_3)_2(\text{Tp}^*)]$  (**4b**)

# SUPPORTING INFORMATION

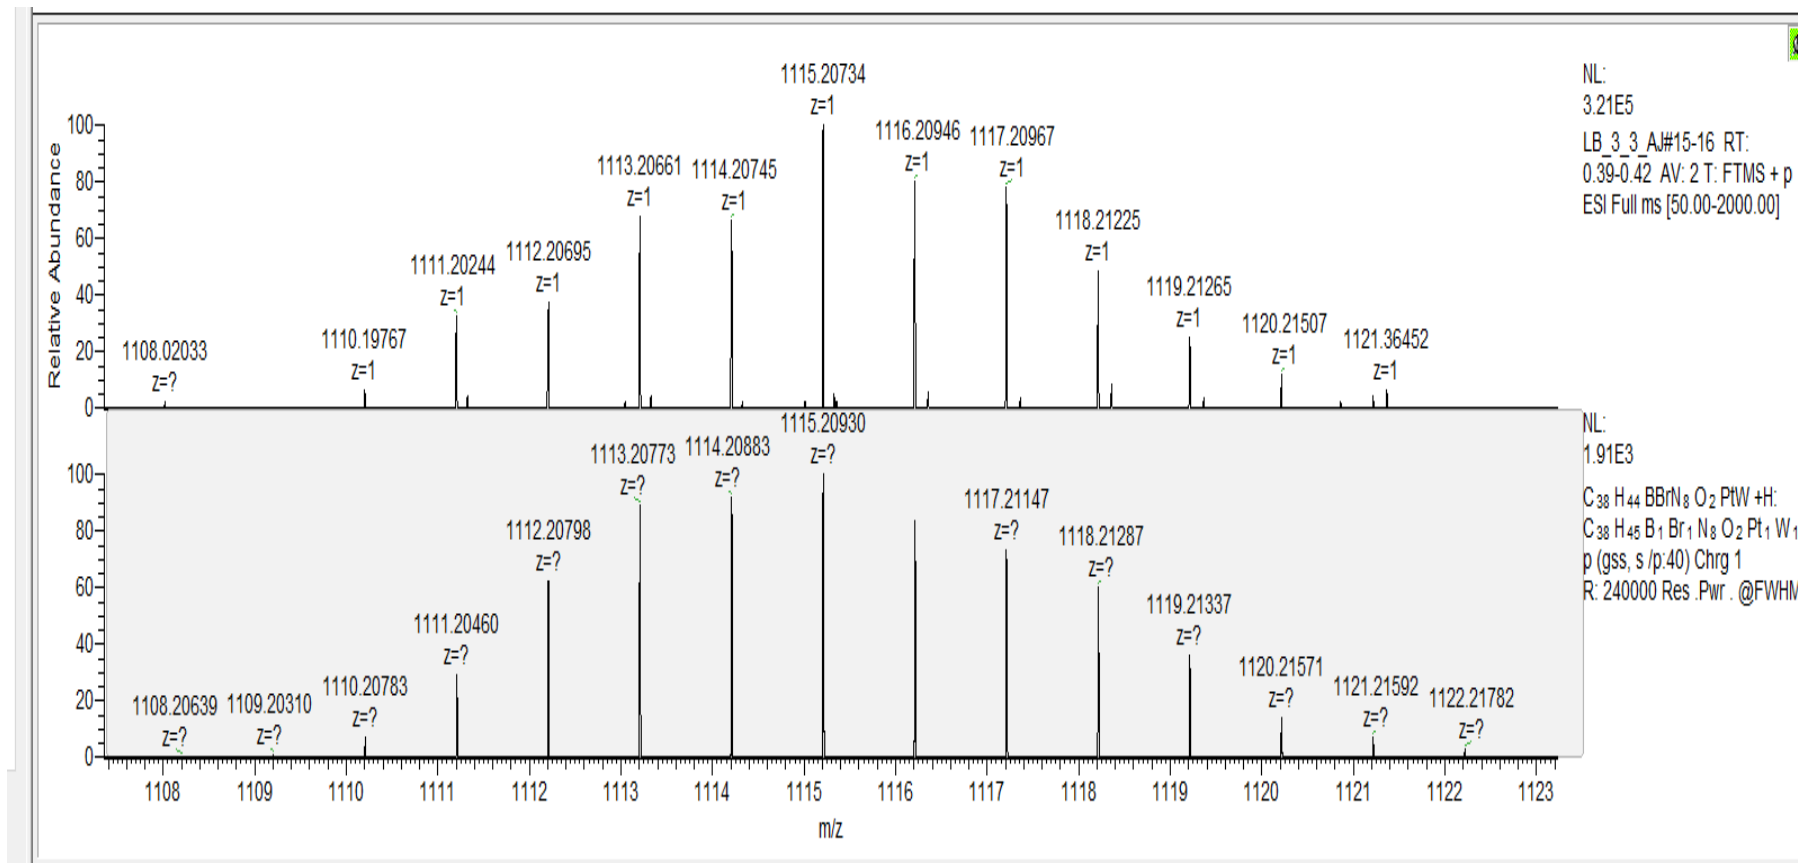

Figure S39. ESI Mass Spectrum (top = measured; bottom = isotopic simulation) of  $[WPt(\mu-C)Br(CO)_2(CNC_6H_2Me_3)_2(Tp^*)]$  (**4b**)

## SUPPORTING INFORMATION

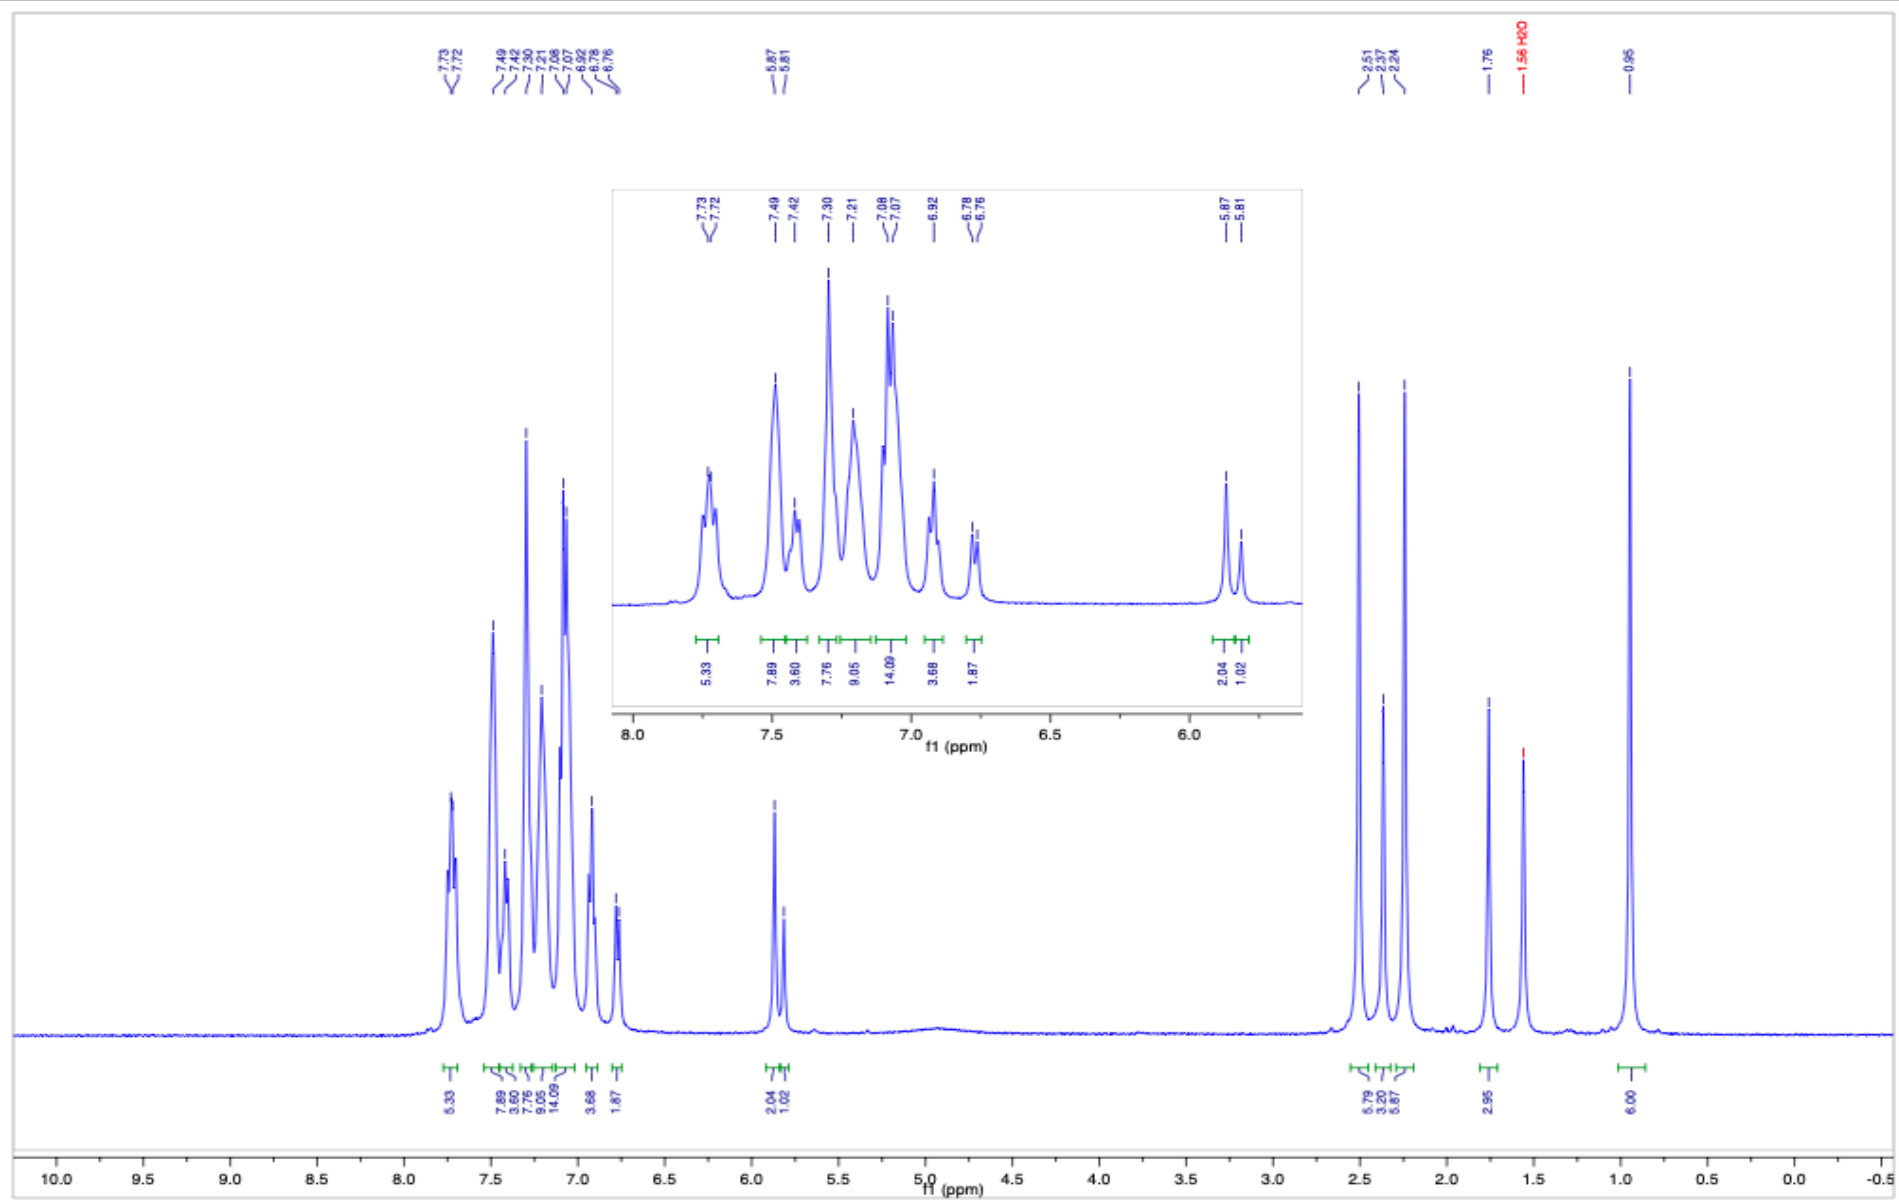

**Figure S40.**  $^1\text{H}$  NMR Spectrum (400 MHz,  $\text{CDCl}_3$ , 298 K,  $\delta$ ) of  $[\text{WPt}(\mu\text{-CCNC}_6\text{H}_3\text{Me}_2)(\text{CO})_2(\text{PPh}_3)_2(\text{Tp}^*)]\text{PF}_6$  [5a]BPh<sub>4</sub>.

# SUPPORTING INFORMATION

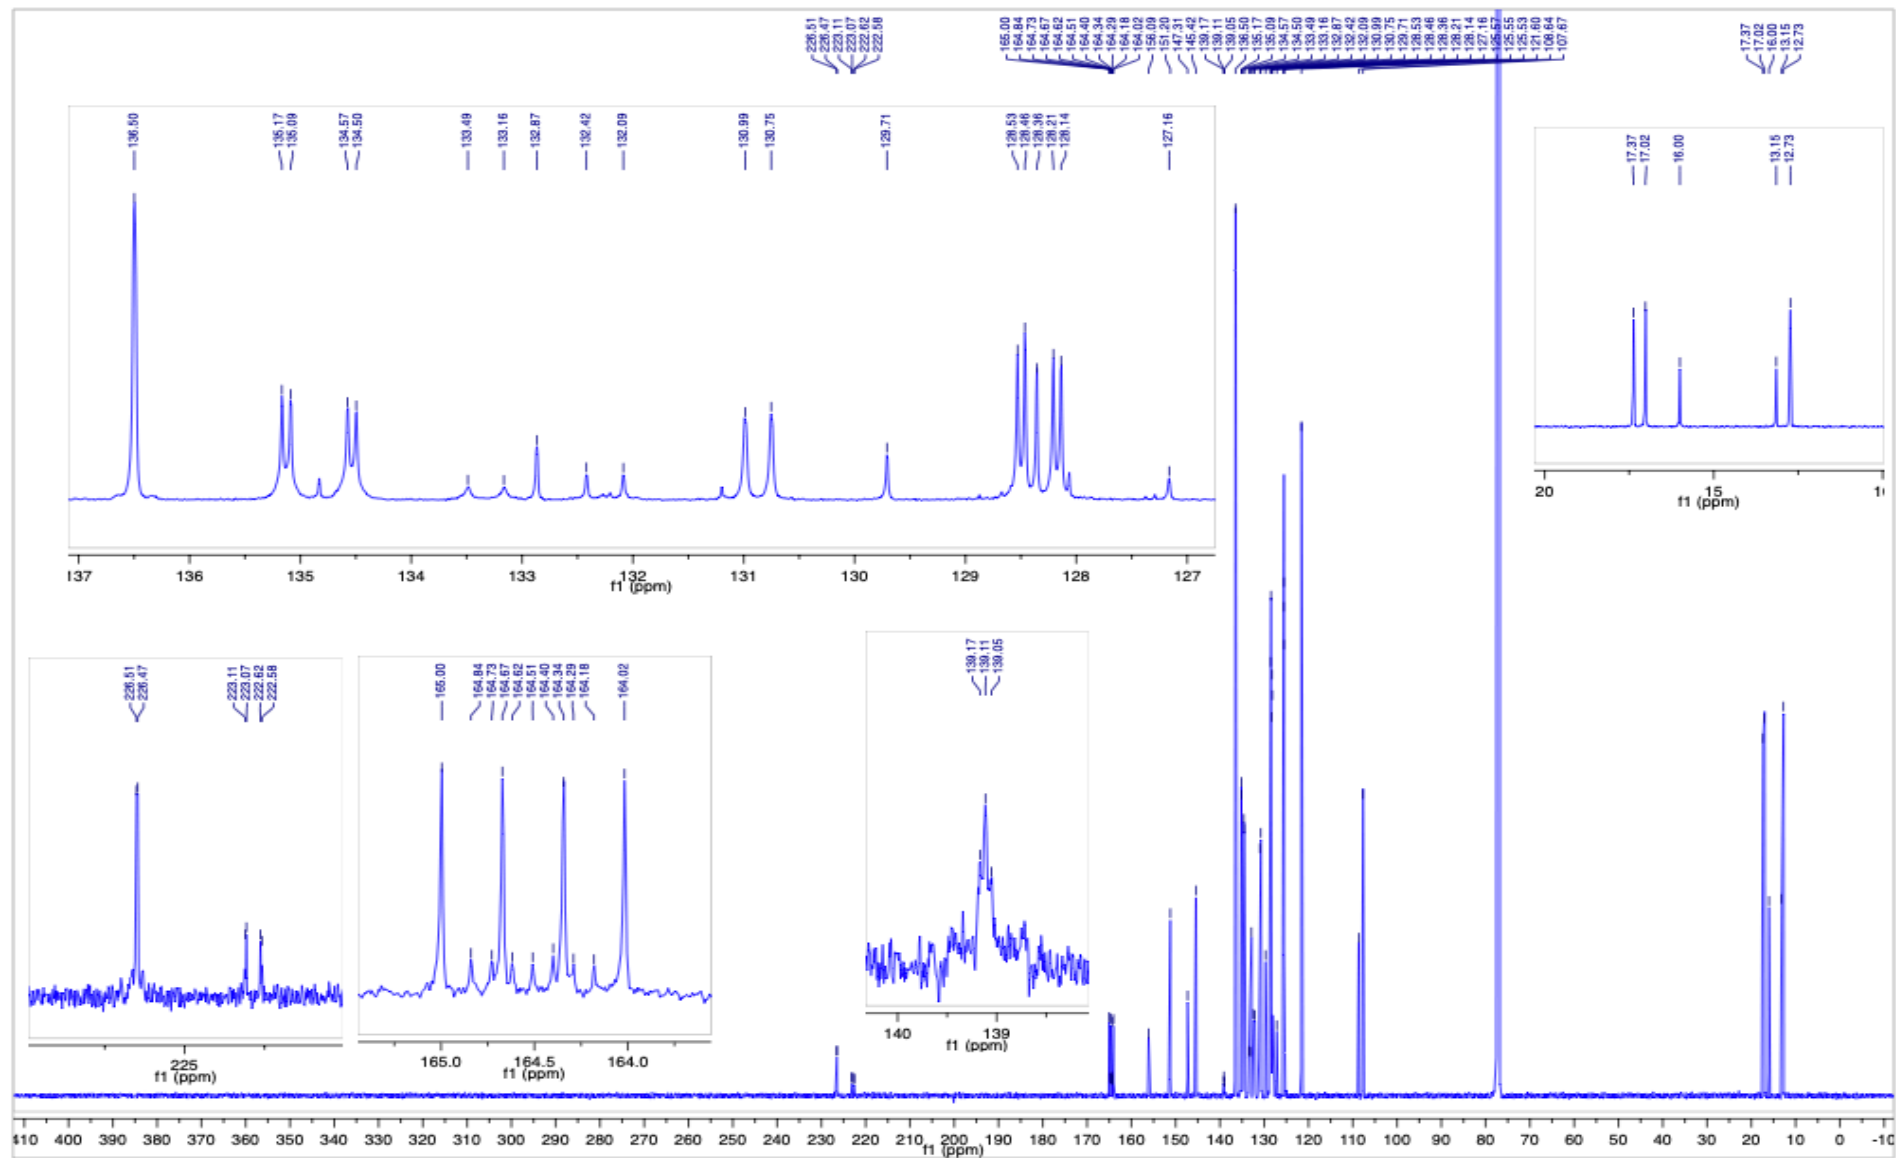

Figure S41.  $^{13}\text{C}\{^1\text{H}\}$  NMR Spectrum (151 MHz, CDCl<sub>3</sub>, 298 K,  $\delta$ ) of  $[\text{WPt}(\mu\text{-CCNC}_6\text{H}_3\text{Me}_2)(\text{CO})_2(\text{PPh}_3)_2(\text{Tp}^*)]\text{PF}_6$  [5a]BPh<sub>4</sub>.

## SUPPORTING INFORMATION

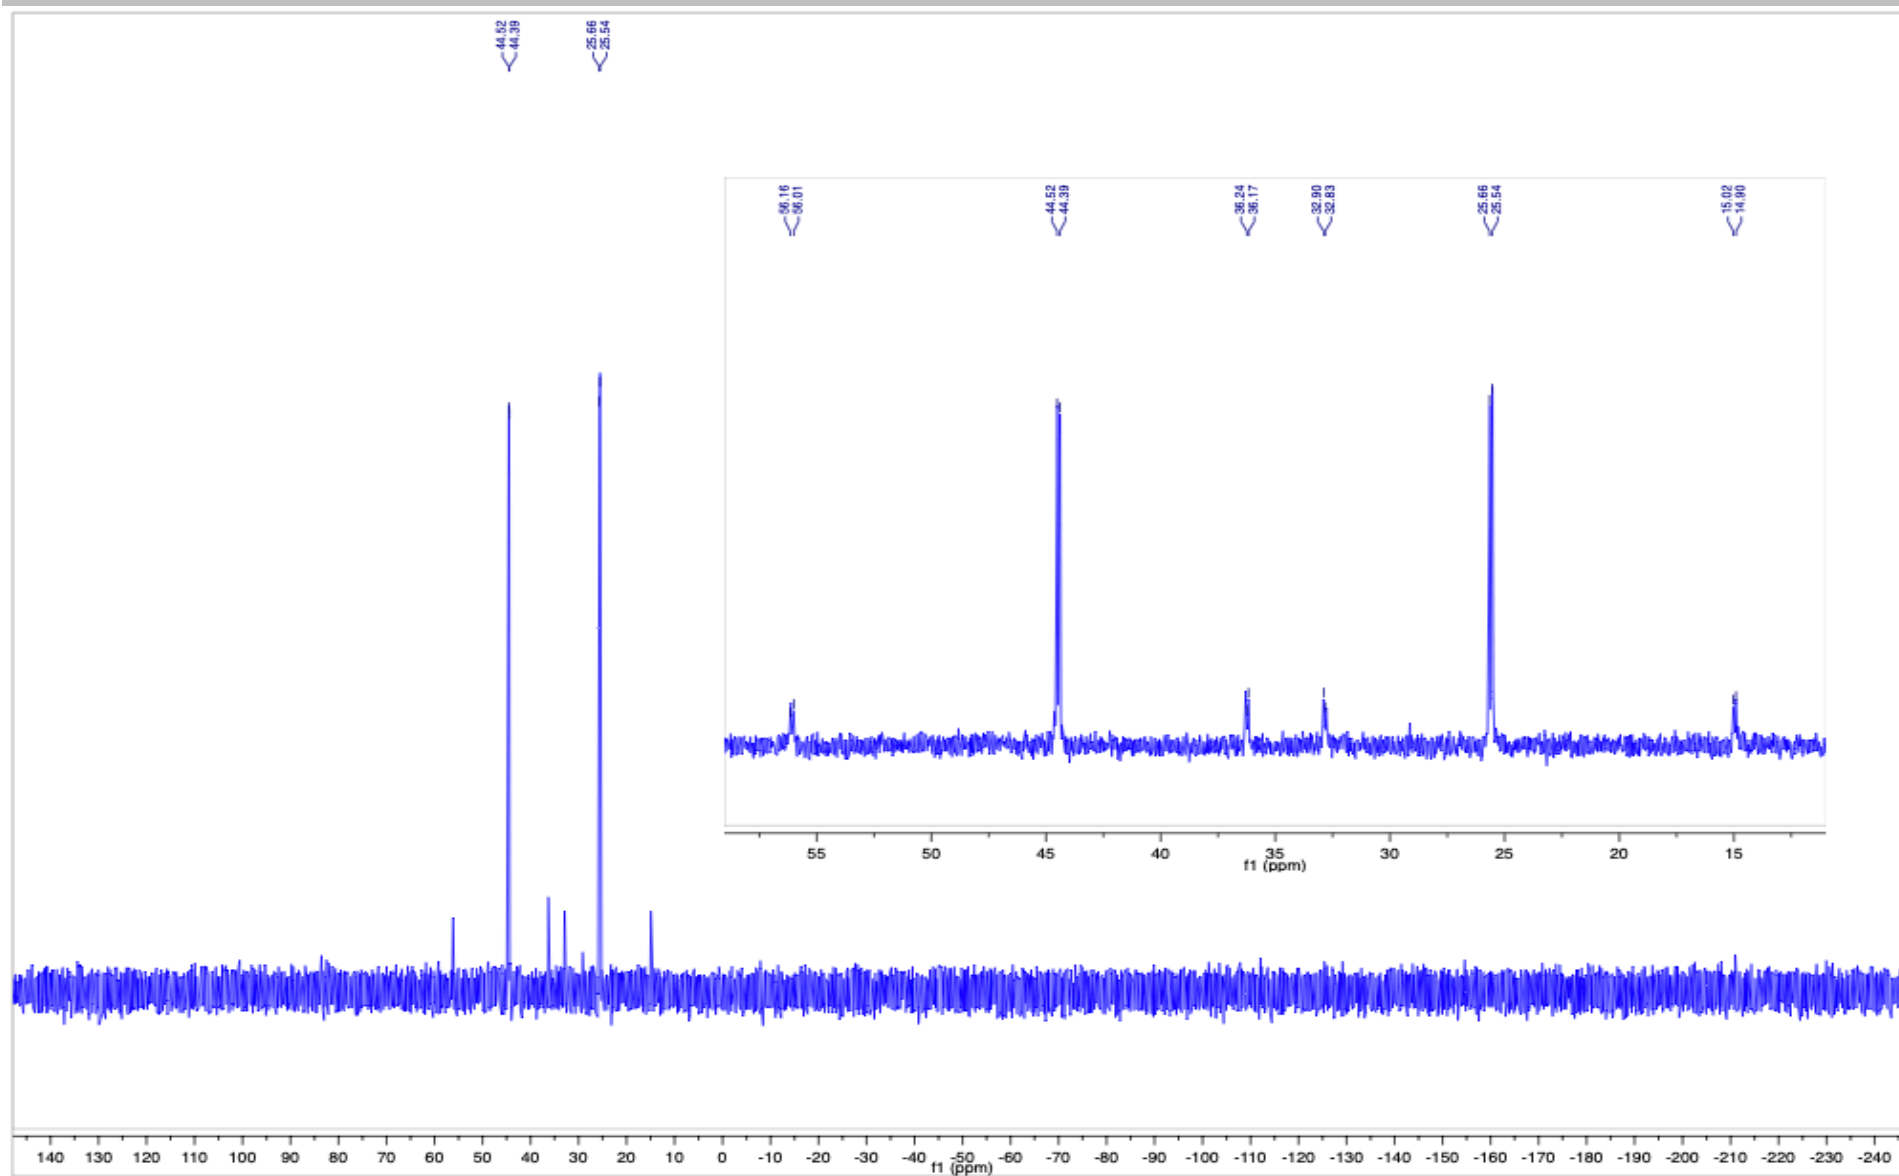

**Figure S42.**  $^{31}\text{P}\{^1\text{H}\}$  NMR Spectrum (162 MHz,  $\text{CDCl}_3$ , 298 K,  $\delta$ ) of  $[\text{WPt}(\mu\text{-CCNC}_6\text{H}_3\text{Me}_2)(\text{CO})_2(\text{PPh}_3)_2(\text{Tp}^*)]\text{PF}_6$  [5a]BPh<sub>4</sub>.

## SUPPORTING INFORMATION

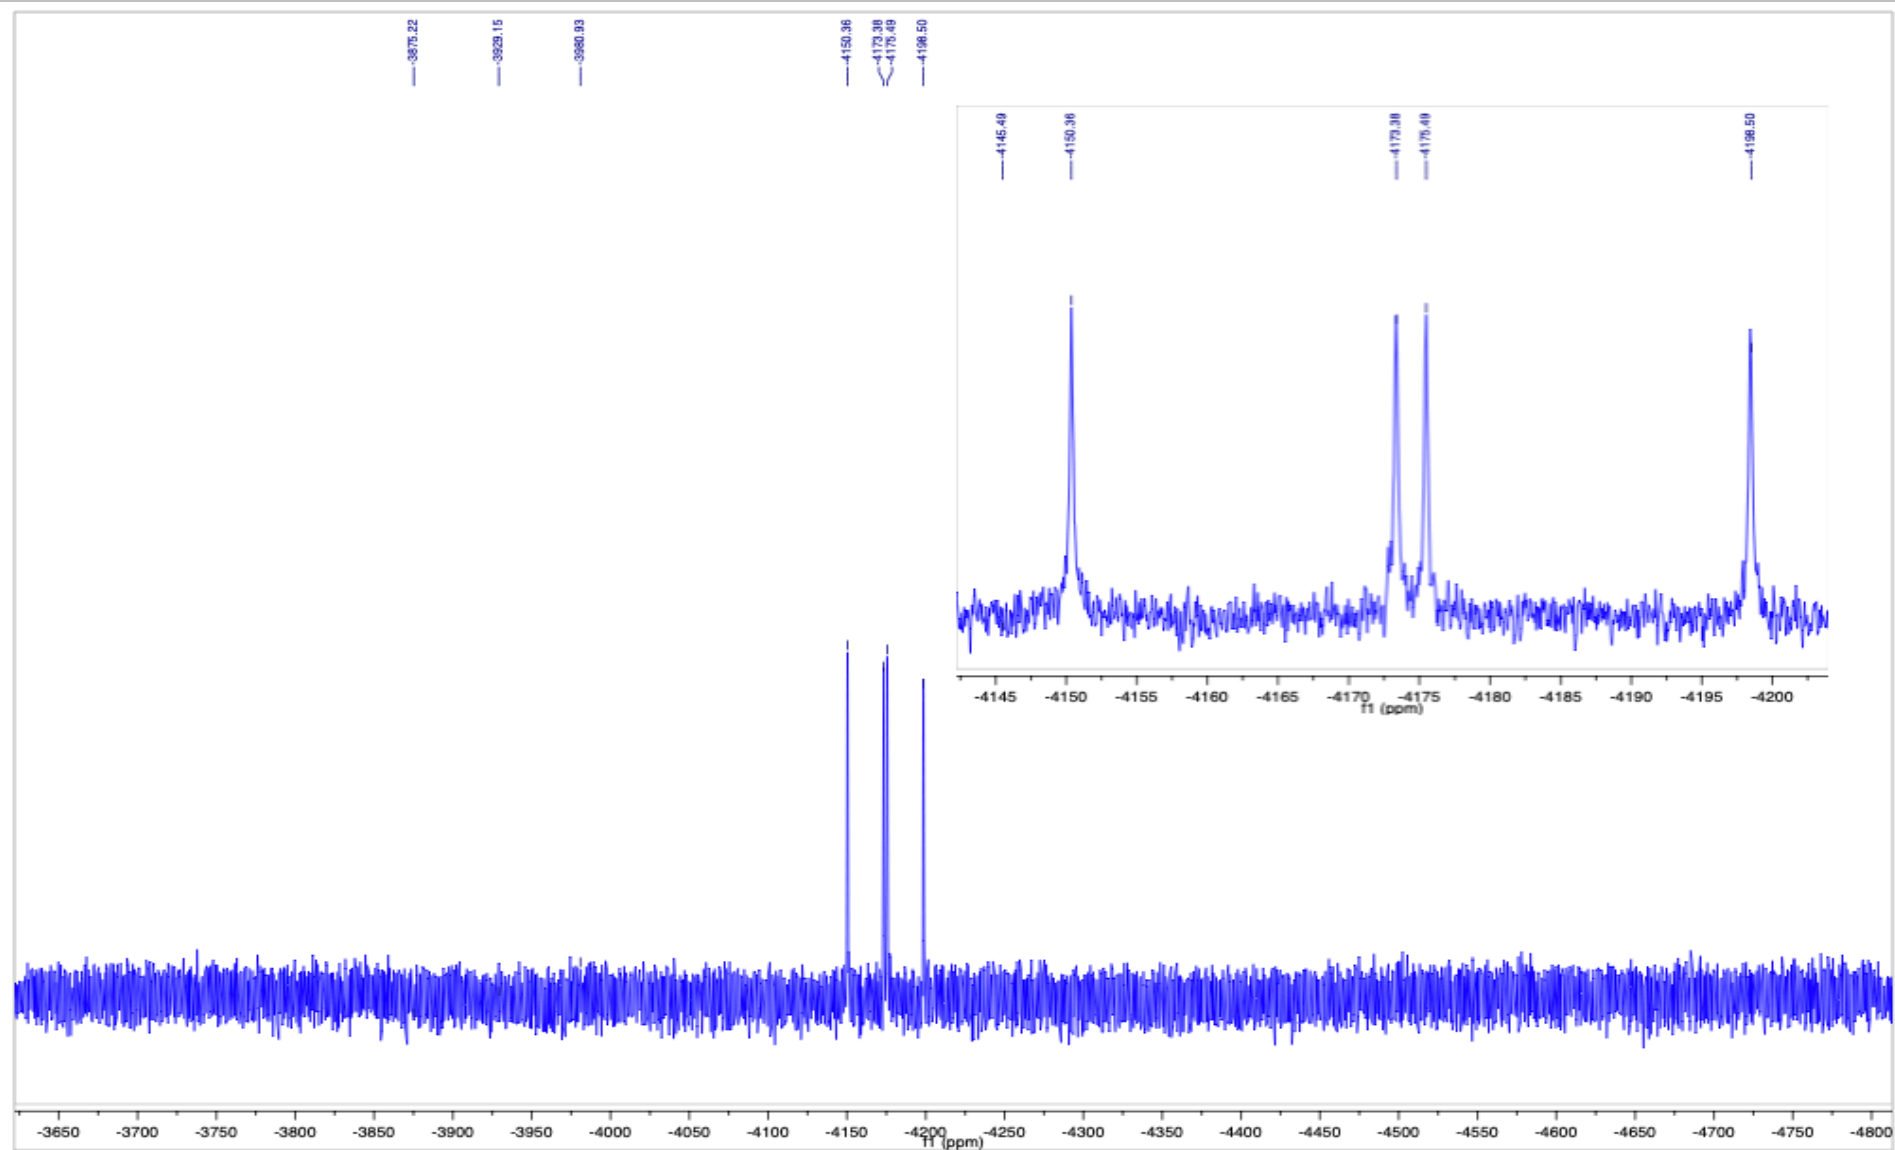

**Figure S43.**  $^{195}\text{Pt}\{^1\text{H}\}$  NMR Spectrum (150 MHz,  $\text{CDCl}_3$ , 298 K,  $\delta$ ) of  $[\text{WPt}(\mu\text{-CCNC}_6\text{H}_3\text{Me}_2)(\text{CO})_2(\text{PPh}_3)_2(\text{Tp}^*)]\text{PF}_6$  [5a]BPh<sub>4</sub>

## SUPPORTING INFORMATION

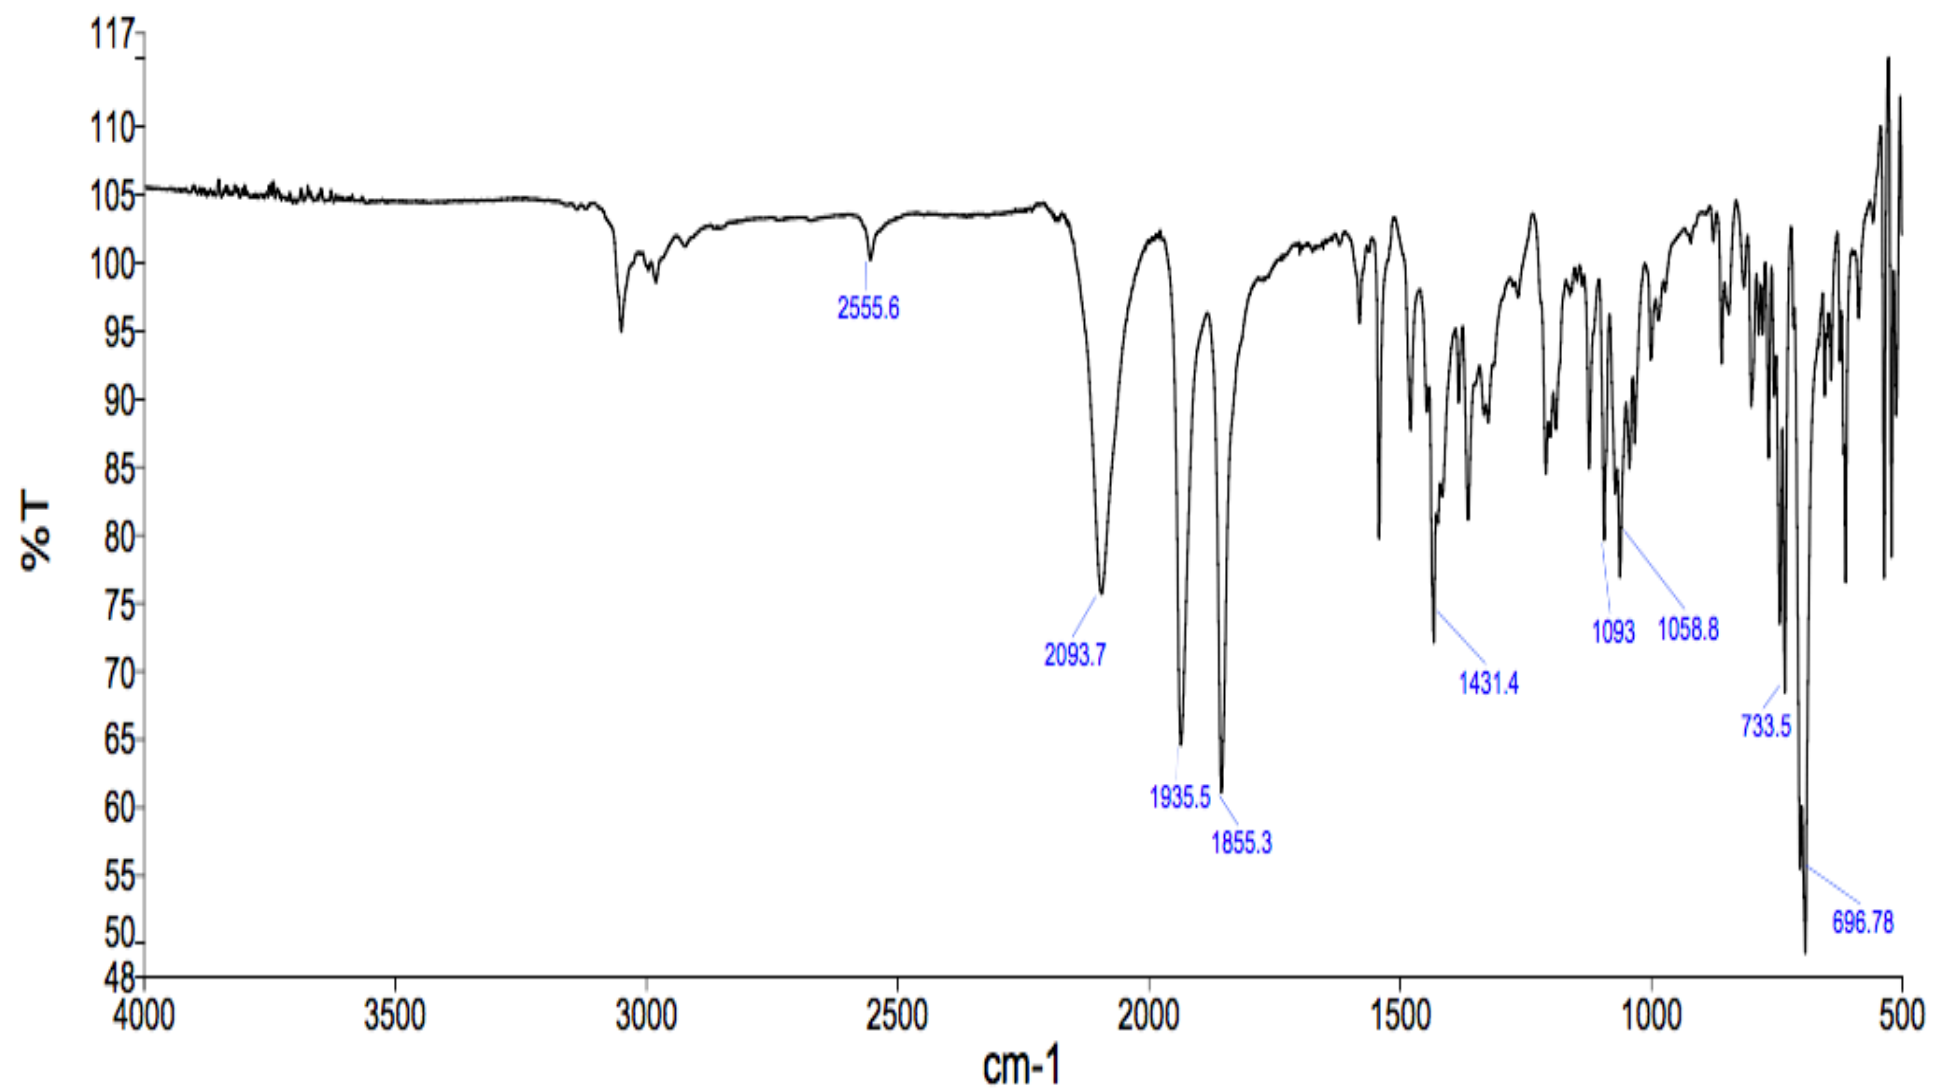

Figure S44. Infrared Spectrum (CH<sub>2</sub>Cl<sub>2</sub>, 298 K, cm<sup>-1</sup>) of [WPt(μ-CCNC<sub>6</sub>H<sub>2</sub>Me<sub>3</sub>)(CO)<sub>2</sub>(PPh<sub>3</sub>)<sub>2</sub>(Tp\*)] ([5a]BPh<sub>4</sub>)

## SUPPORTING INFORMATION

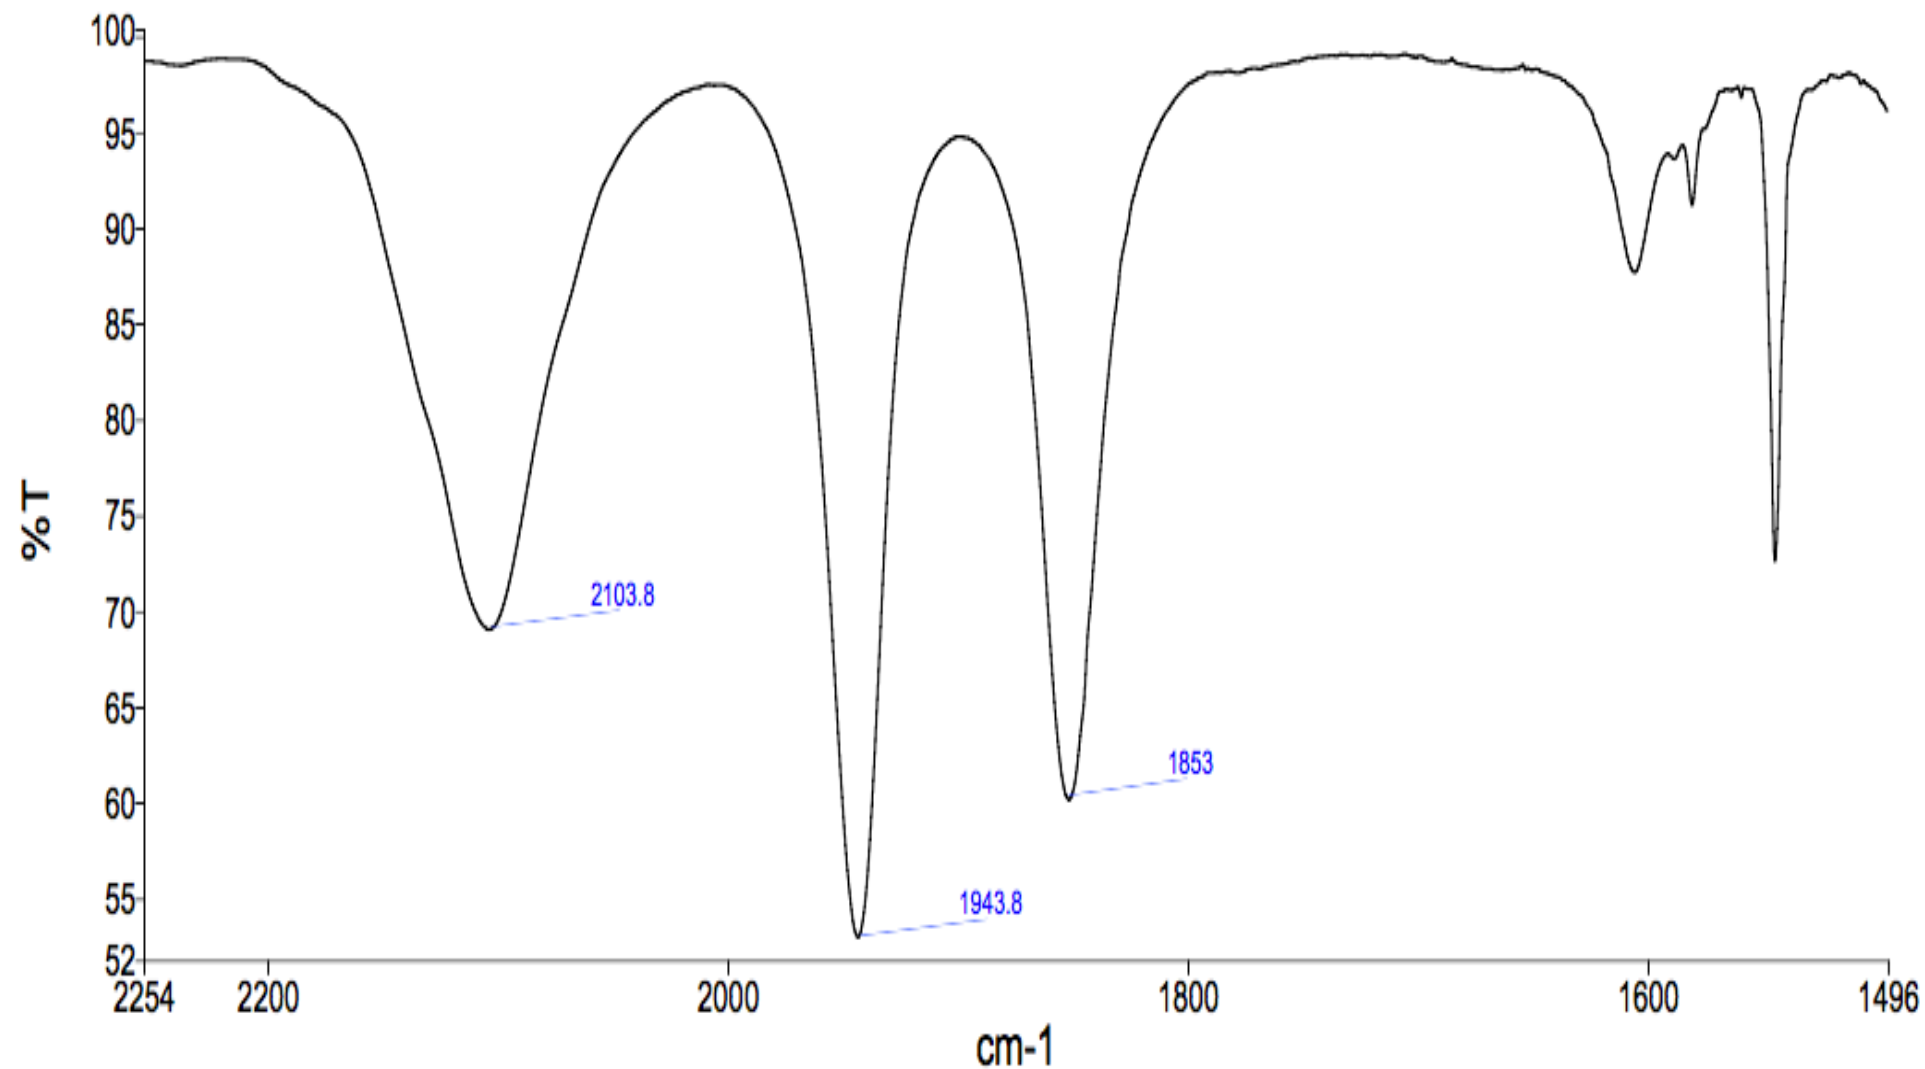

Figure S45. Infrared Spectrum (ATR, diamond anvil, 298 K, cm<sup>-1</sup>) of [WPt(μ-CCNC<sub>6</sub>H<sub>2</sub>Me<sub>3</sub>)(CO)<sub>2</sub>(PPh<sub>3</sub>)<sub>2</sub>(Tp\*)] ([5a]BPh<sub>4</sub>)



## Elemental Composition Report

## Single Mass Analysis

Tolerance = 3.0 PPM / DBE: min = -1.5, max = 50.0

Element prediction: Off

Number of isotope peaks used for i-FIT = 3

Monoisotopic Mass, Odd and Even Electron Ions

250 formula(e) evaluated with 1 results within limits (up to 50 best isotopic matches for each mass)

Elements Used:

C: 0-70 H: 0-70 11B: 0-1 N: 7-8 O: 0-2 P: 0-2 184W: 0-1 195Pt: 0-1

LB-5-91/AJ

66375

0129 61 (0.138) Cm (38:81)

SYNAPT G2-Si#NotSet

11-Feb-2021

15:28:12

1: TOF MS ES+

5.90e+007

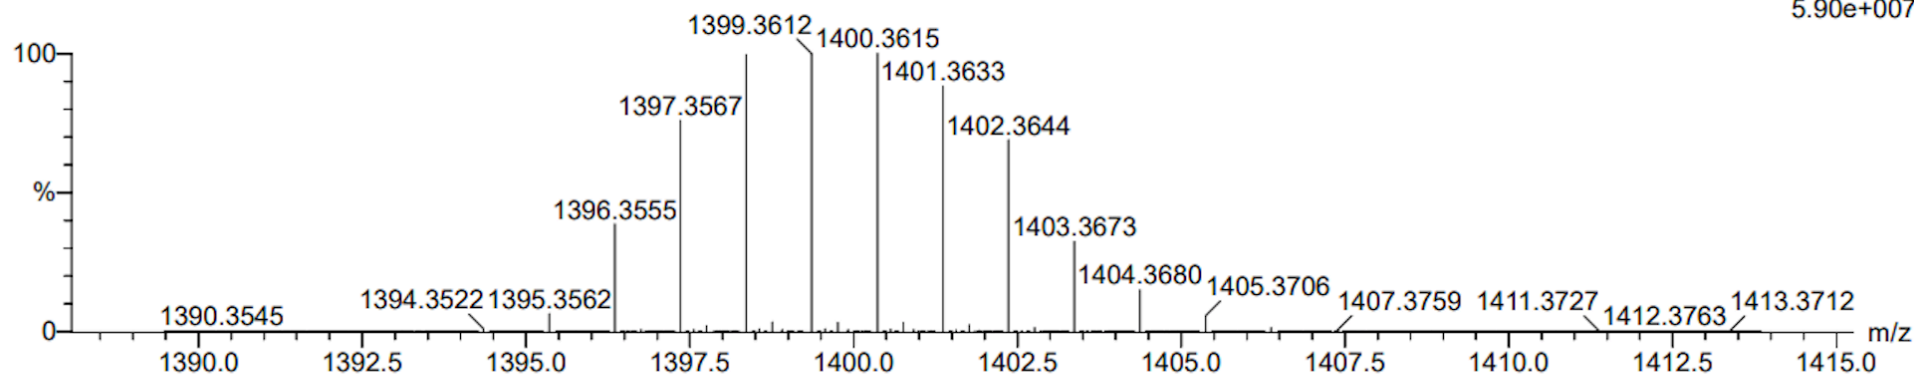

Minimum: -1.5  
 Maximum: 5.0 3.0 50.0

| Mass      | Calc. Mass | mDa | PPM | DBE  | i-FIT  | Norm | Conf (%) | Formula                         |
|-----------|------------|-----|-----|------|--------|------|----------|---------------------------------|
| 1399.3612 | 1399.3612  | 0.0 | 0.0 | 41.0 | 1154.2 | n/a  | n/a      | C63 H61 11B N7 O2 P2 184W 195Pt |

Figure S46. ESI Mass Spectrum (+ve ion) of [WPt( $\mu$ -CCNC<sub>6</sub>H<sub>2</sub>Me<sub>3</sub>)(CO)<sub>2</sub>(PPh<sub>3</sub>)<sub>2</sub>(Tp\*)] ([5a]BPh<sub>4</sub>)

# SUPPORTING INFORMATION

LB-5-91/AJ

66375

0129 61 (0.138) Cm (38:81)

SYNAPT G2-Si#NotSet

11-Feb-2021

15:28:12

1: TOF MS ES+

5.90e7

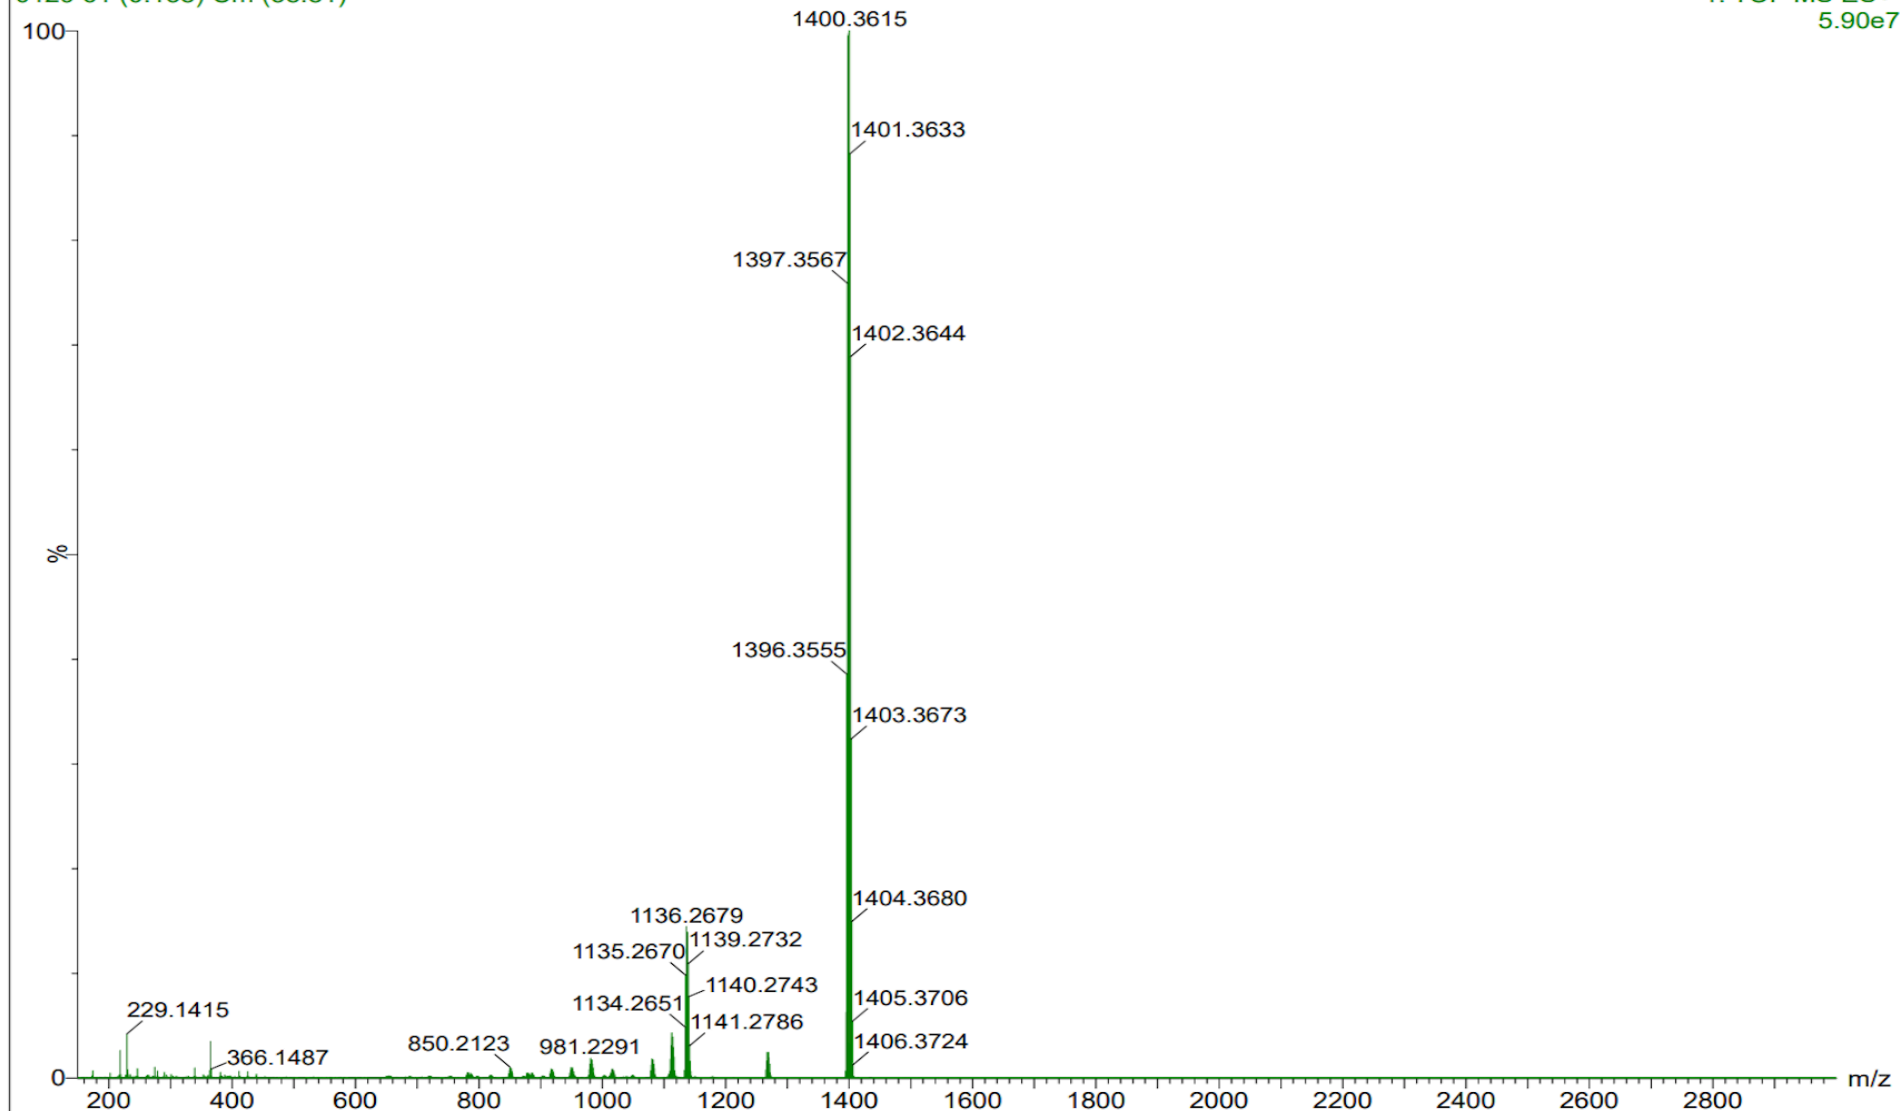

Figure S47. ESI Mass Spectrum (+ve ion) of  $[\text{WPT}(\mu\text{-CCNC}_6\text{H}_2\text{Me}_3)(\text{CO})_2(\text{PPh}_3)_2(\text{Tp}^*)] ([5\text{a}]\text{BPh}_4)$  (cont.).

# SUPPORTING INFORMATION

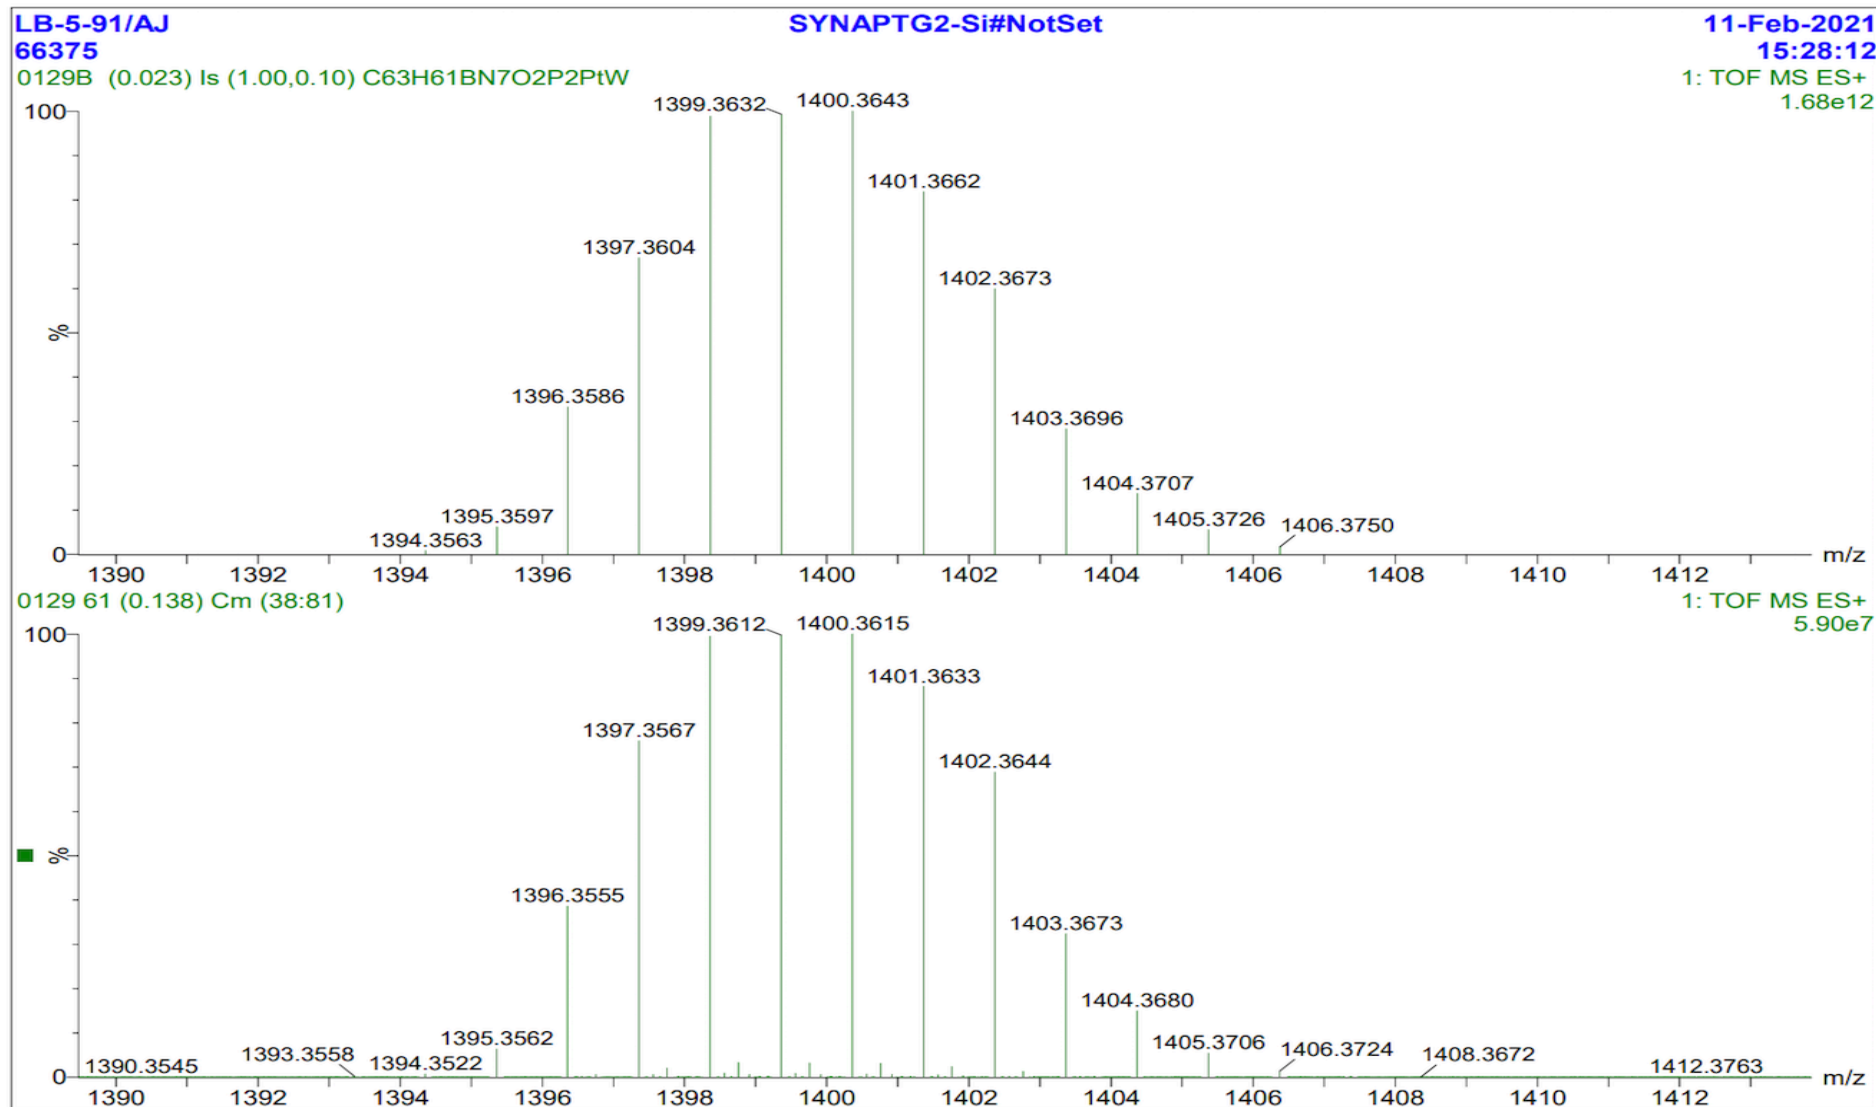

Figure S48. ESI Mass Spectrum (top = measured; bottom = isotopic simulation) of  $[\text{WPt}(\mu\text{-CCNC}_6\text{H}_2\text{Me}_3)(\text{CO})_2(\text{PPh}_3)_2(\text{Tp}^*)][\text{BPh}_4]$  ([5a]BPh<sub>4</sub>)

## SUPPORTING INFORMATION

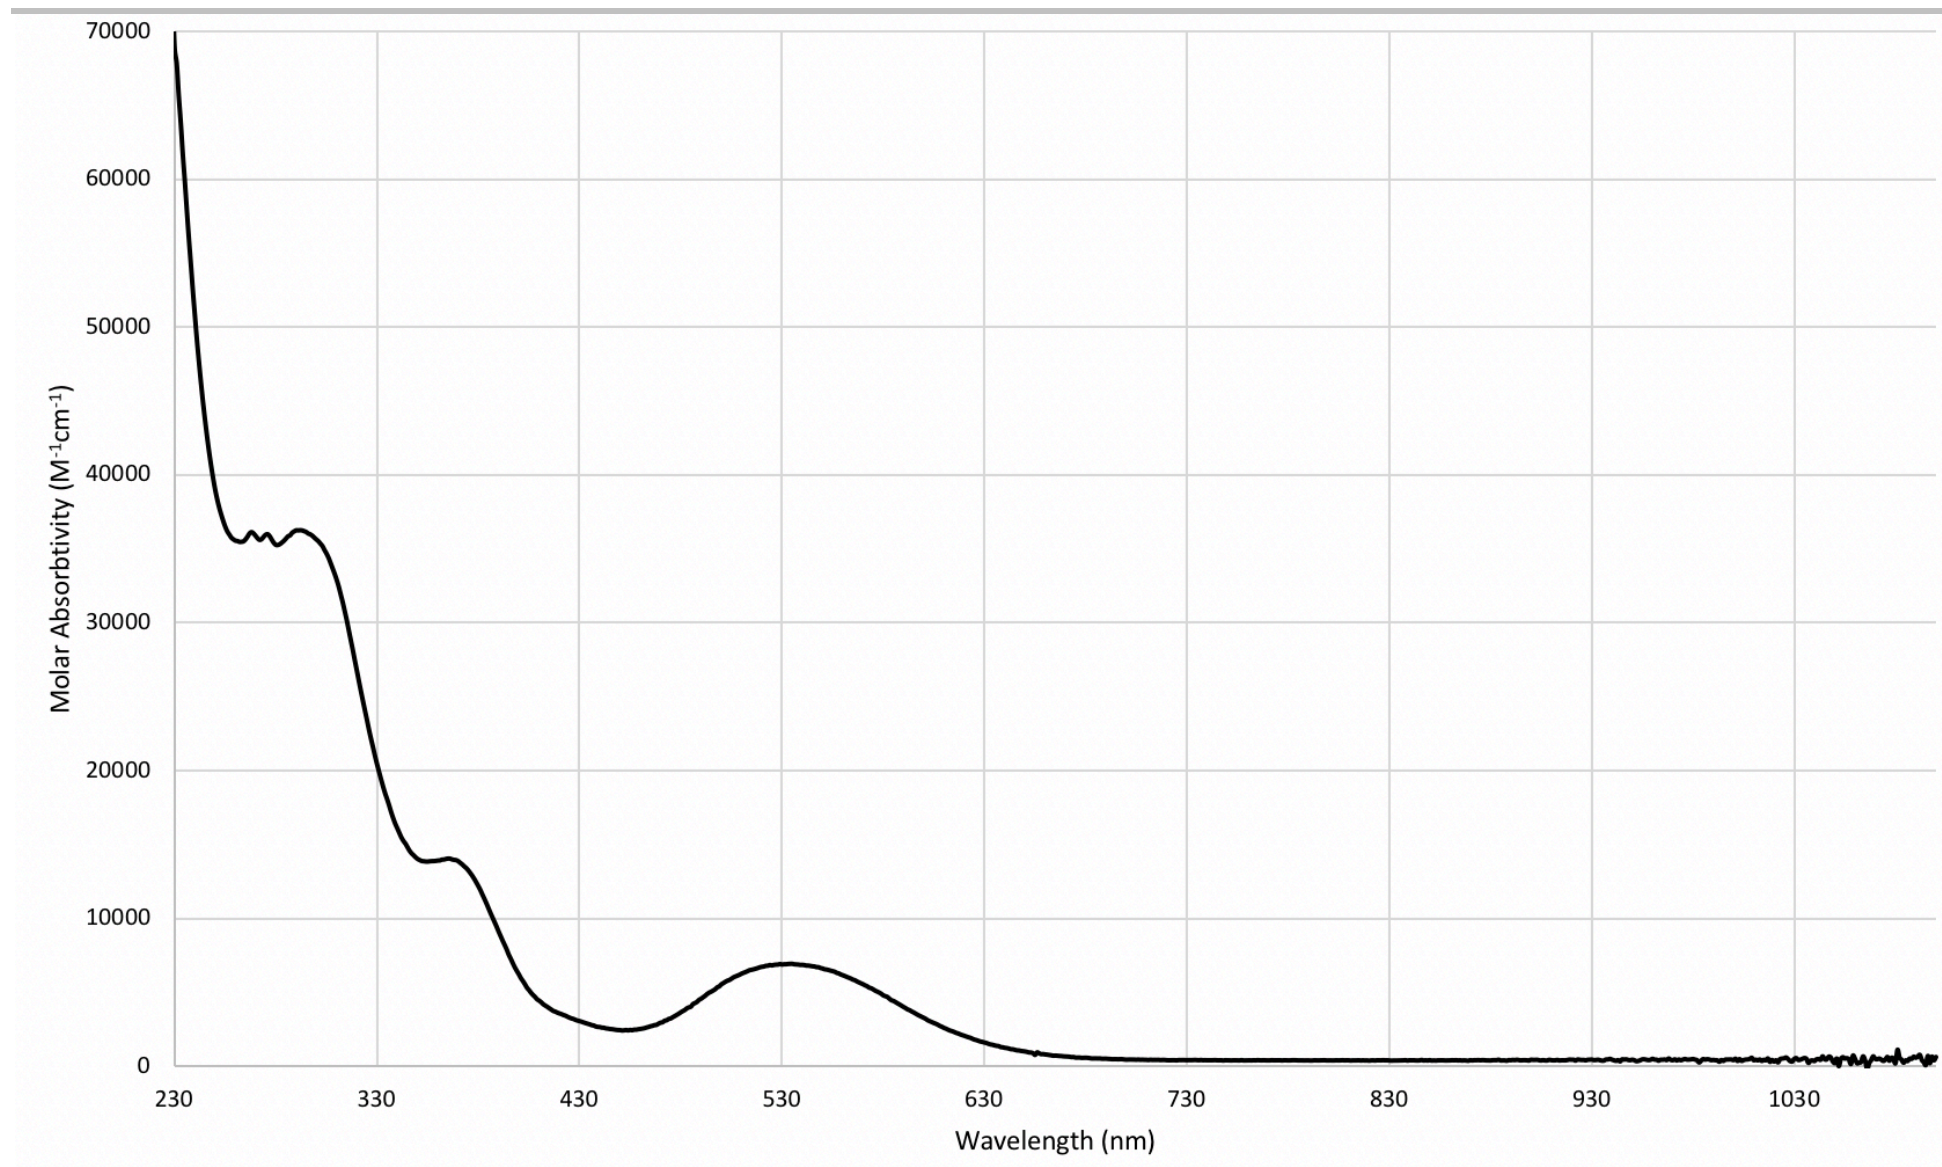

**Figure 49.** Electronic Spectrum of [WPt(μ-CCNC<sub>6</sub>H<sub>2</sub>Me<sub>3</sub>)(CO)<sub>2</sub>(PPh<sub>3</sub>)<sub>2</sub>(Tp\*)] ([5a]BPh<sub>4</sub>)

# SUPPORTING INFORMATION

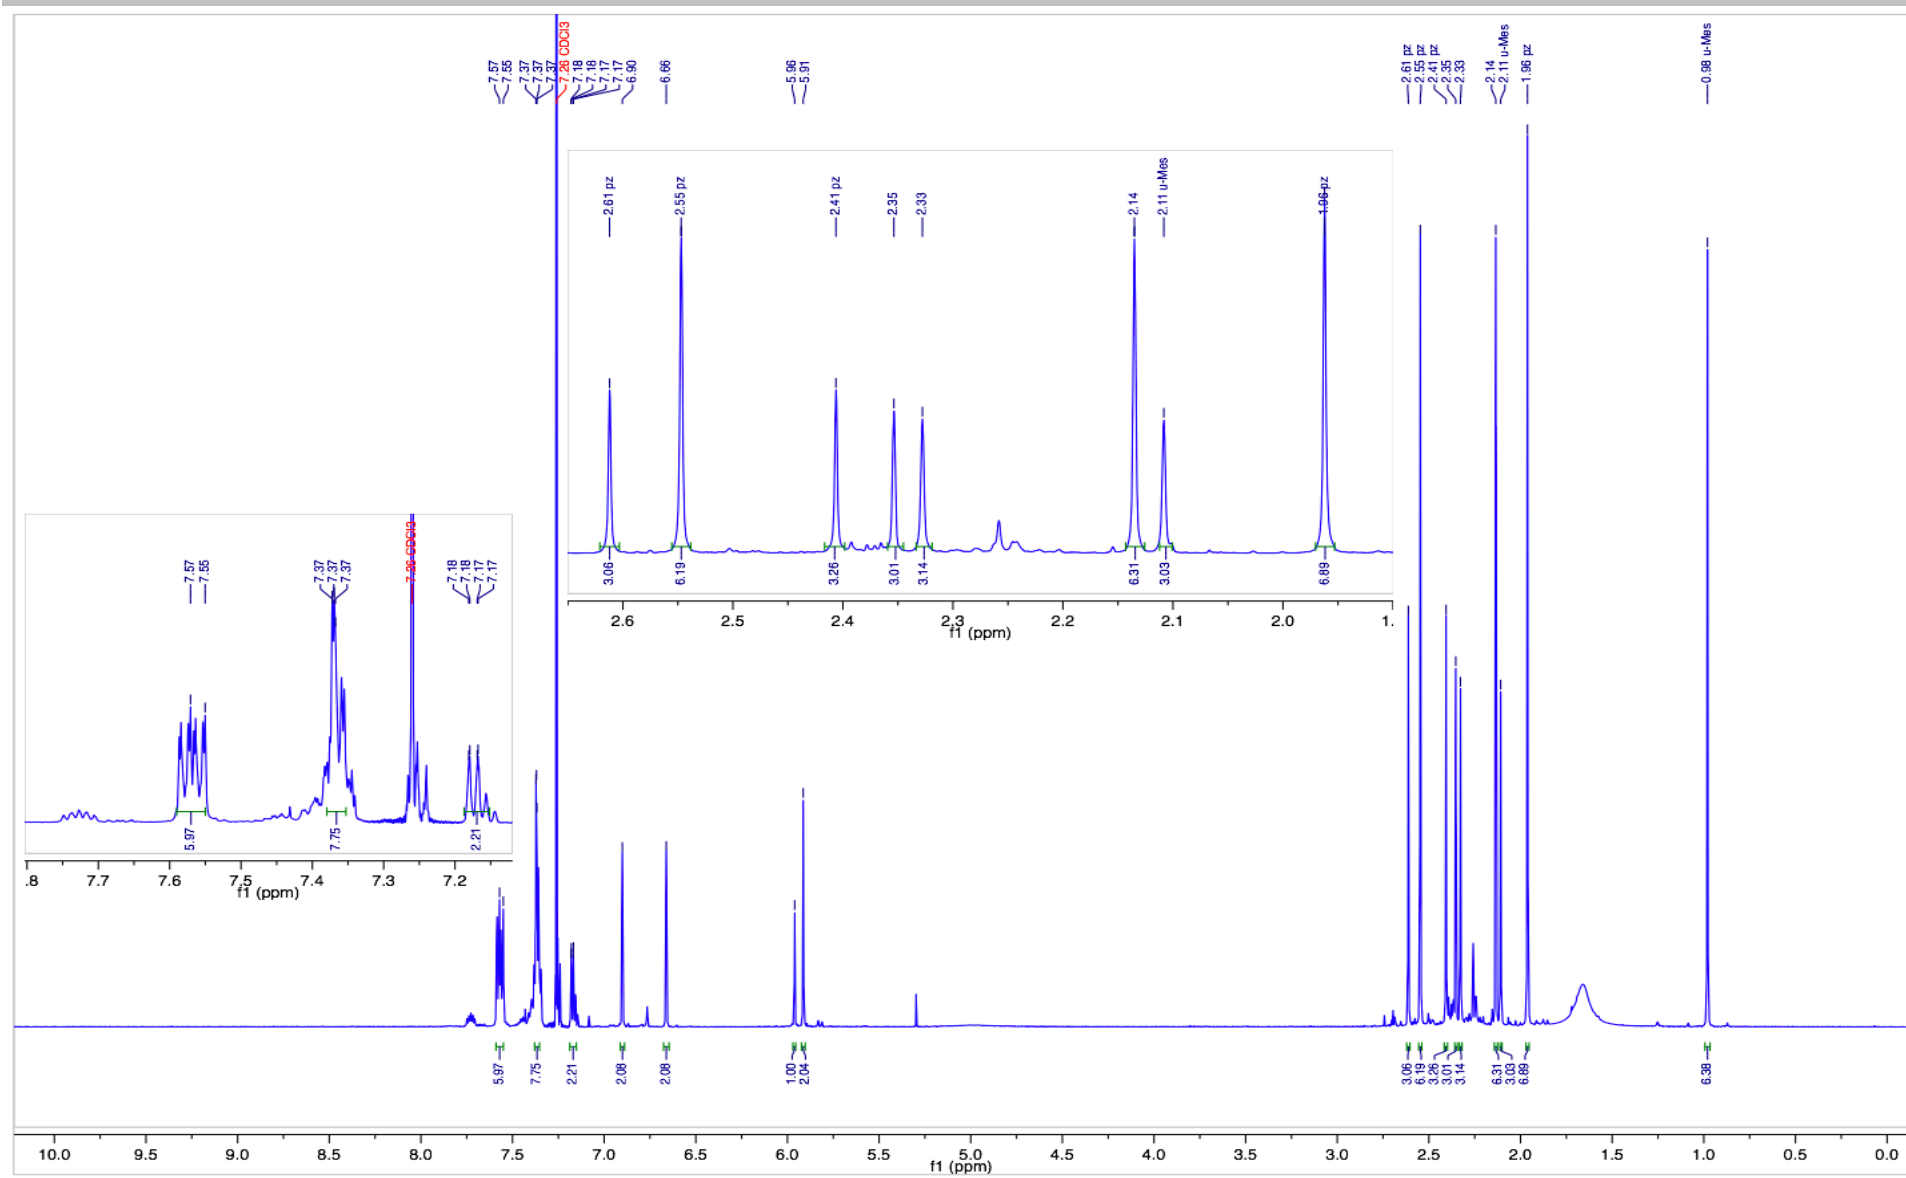

Figure S50.  $^1\text{H}$  NMR Spectrum (600 MHz, CDCl<sub>3</sub>, 298 K,  $\delta$ ) of  $[\text{WPt}(\mu\text{-CCNC}_6\text{H}_2\text{Me}_3)(\text{CO})_2(\text{CNC}_6\text{H}_2\text{Me}_3)(\text{PPh}_3)(\text{Tp}^*)]\text{PF}_6$  [5b]PF<sub>6</sub>.

# SUPPORTING INFORMATION

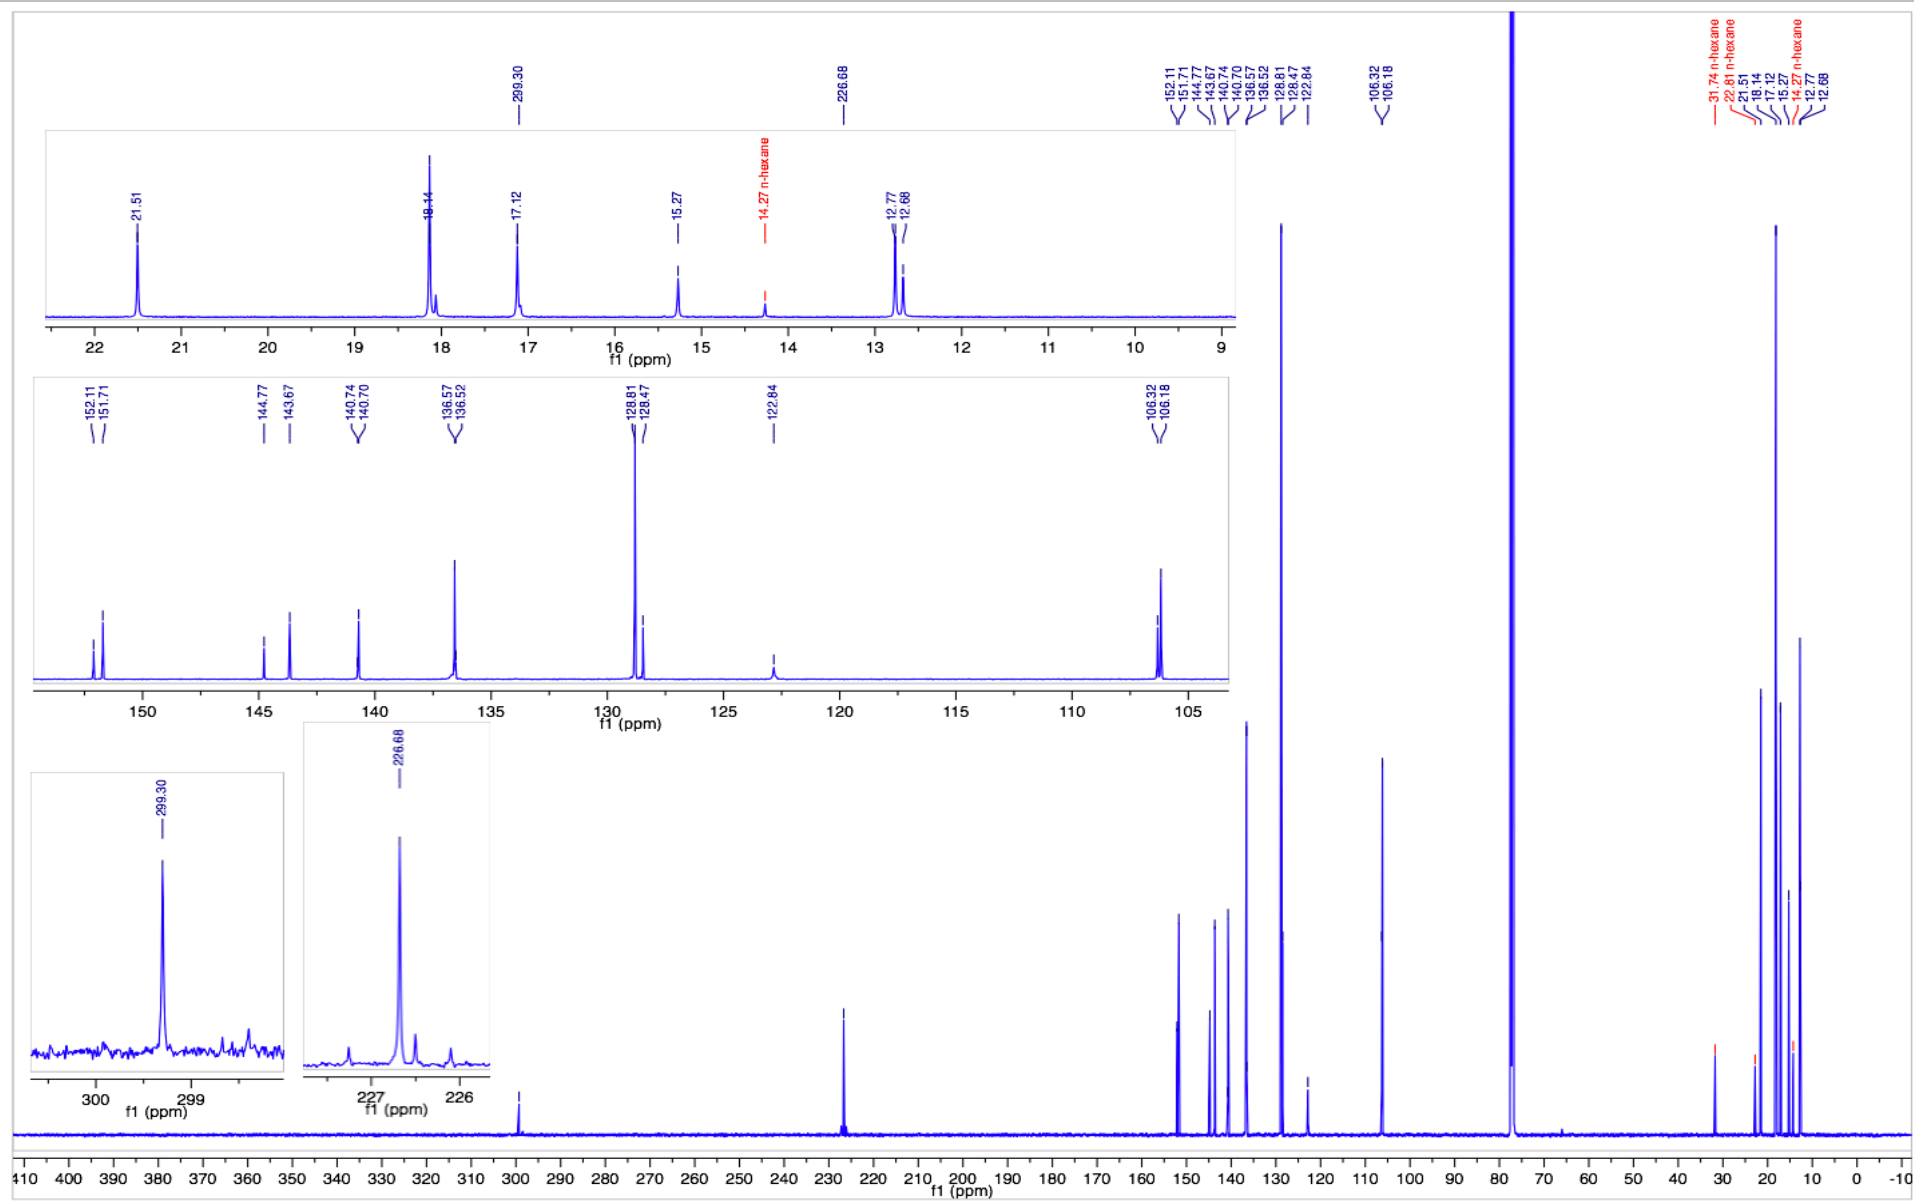

## SUPPORTING INFORMATION

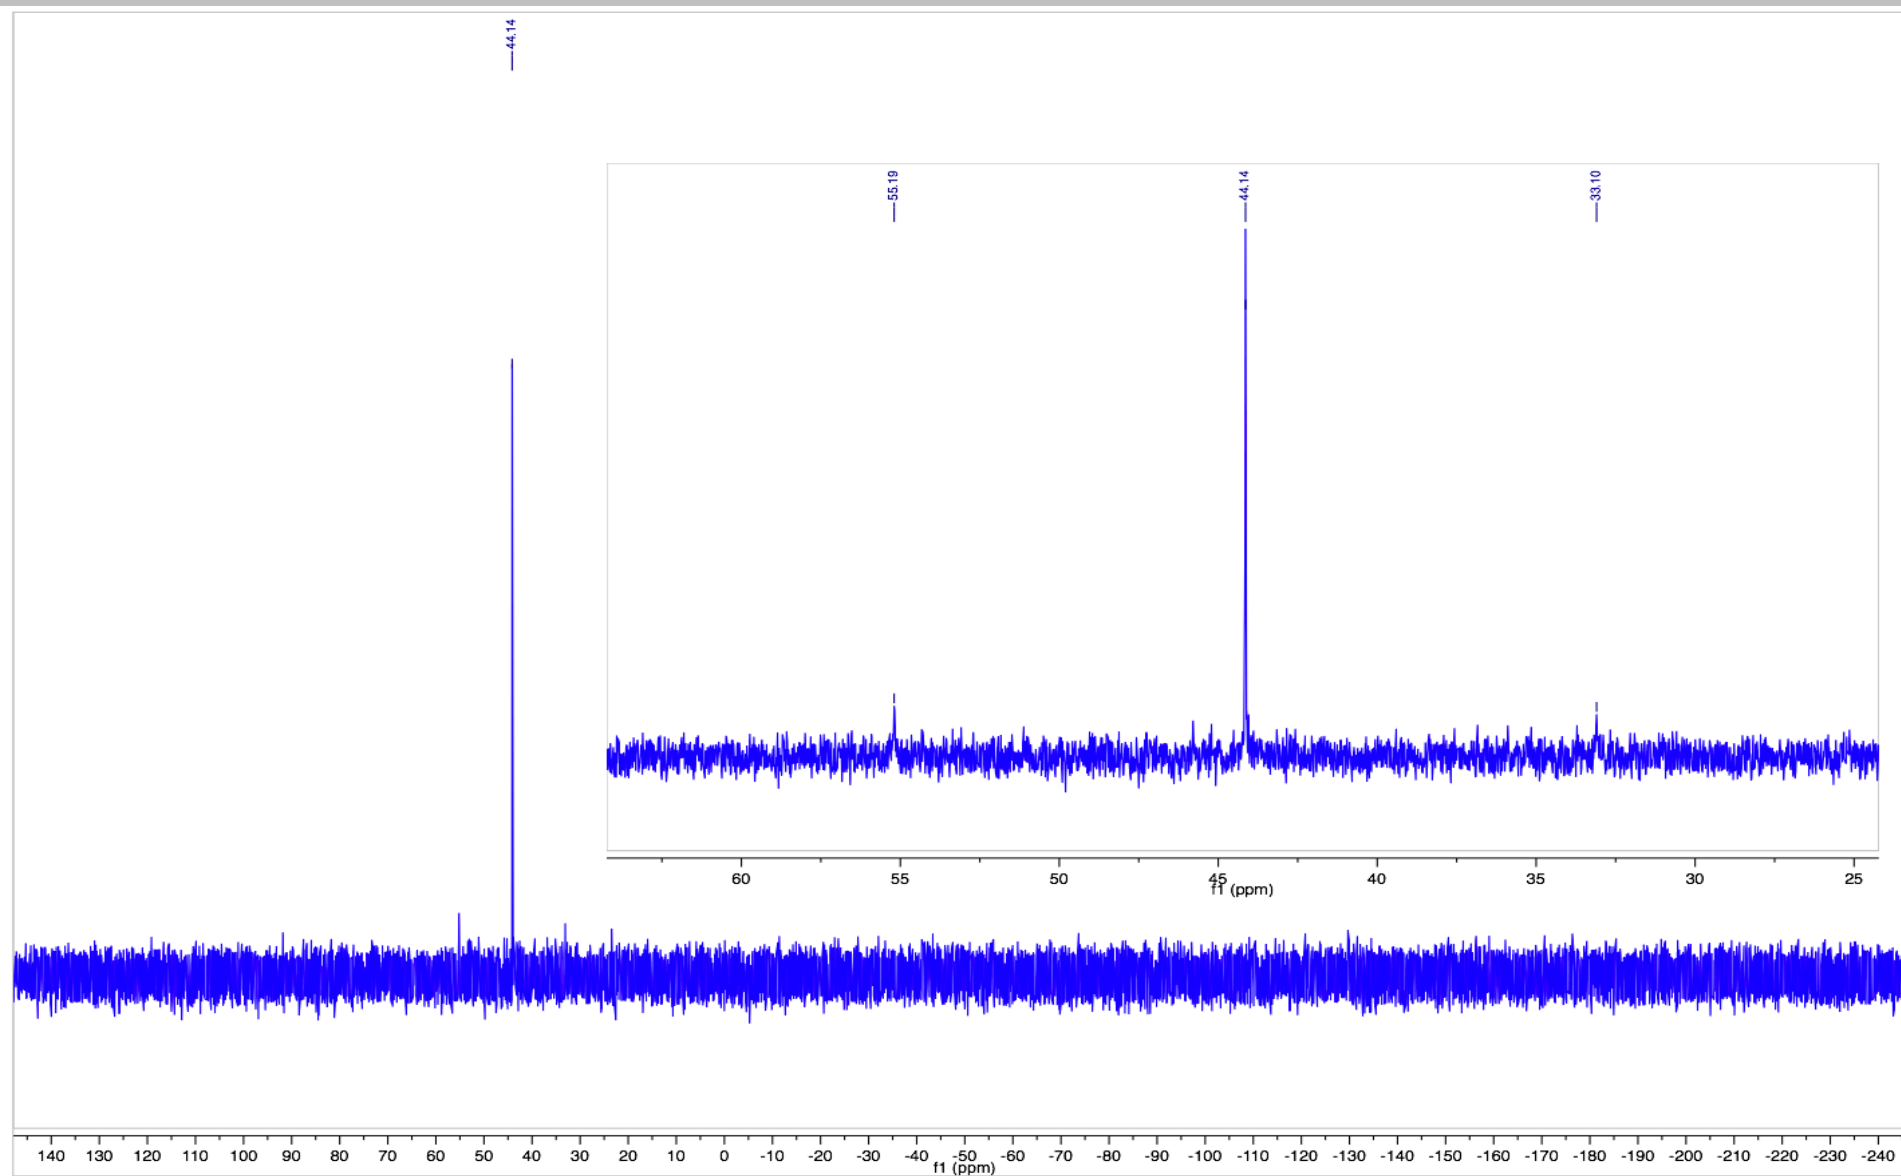

**Figure S52.**  $^{31}\text{P}\{^1\text{H}\}$  NMR Spectrum (162 MHz,  $\text{CDCl}_3$ , 298 K,  $\delta$ ) of  $[\text{WPt}(\mu\text{-CCNC}_6\text{H}_2\text{Me}_3)(\text{CO})_2(\text{CNC}_6\text{H}_2\text{Me}_3)(\text{PPh}_3)(\text{Tp}^*)]\text{PF}_6$  [**5b**] $\text{PF}_6$ .

## SUPPORTING INFORMATION

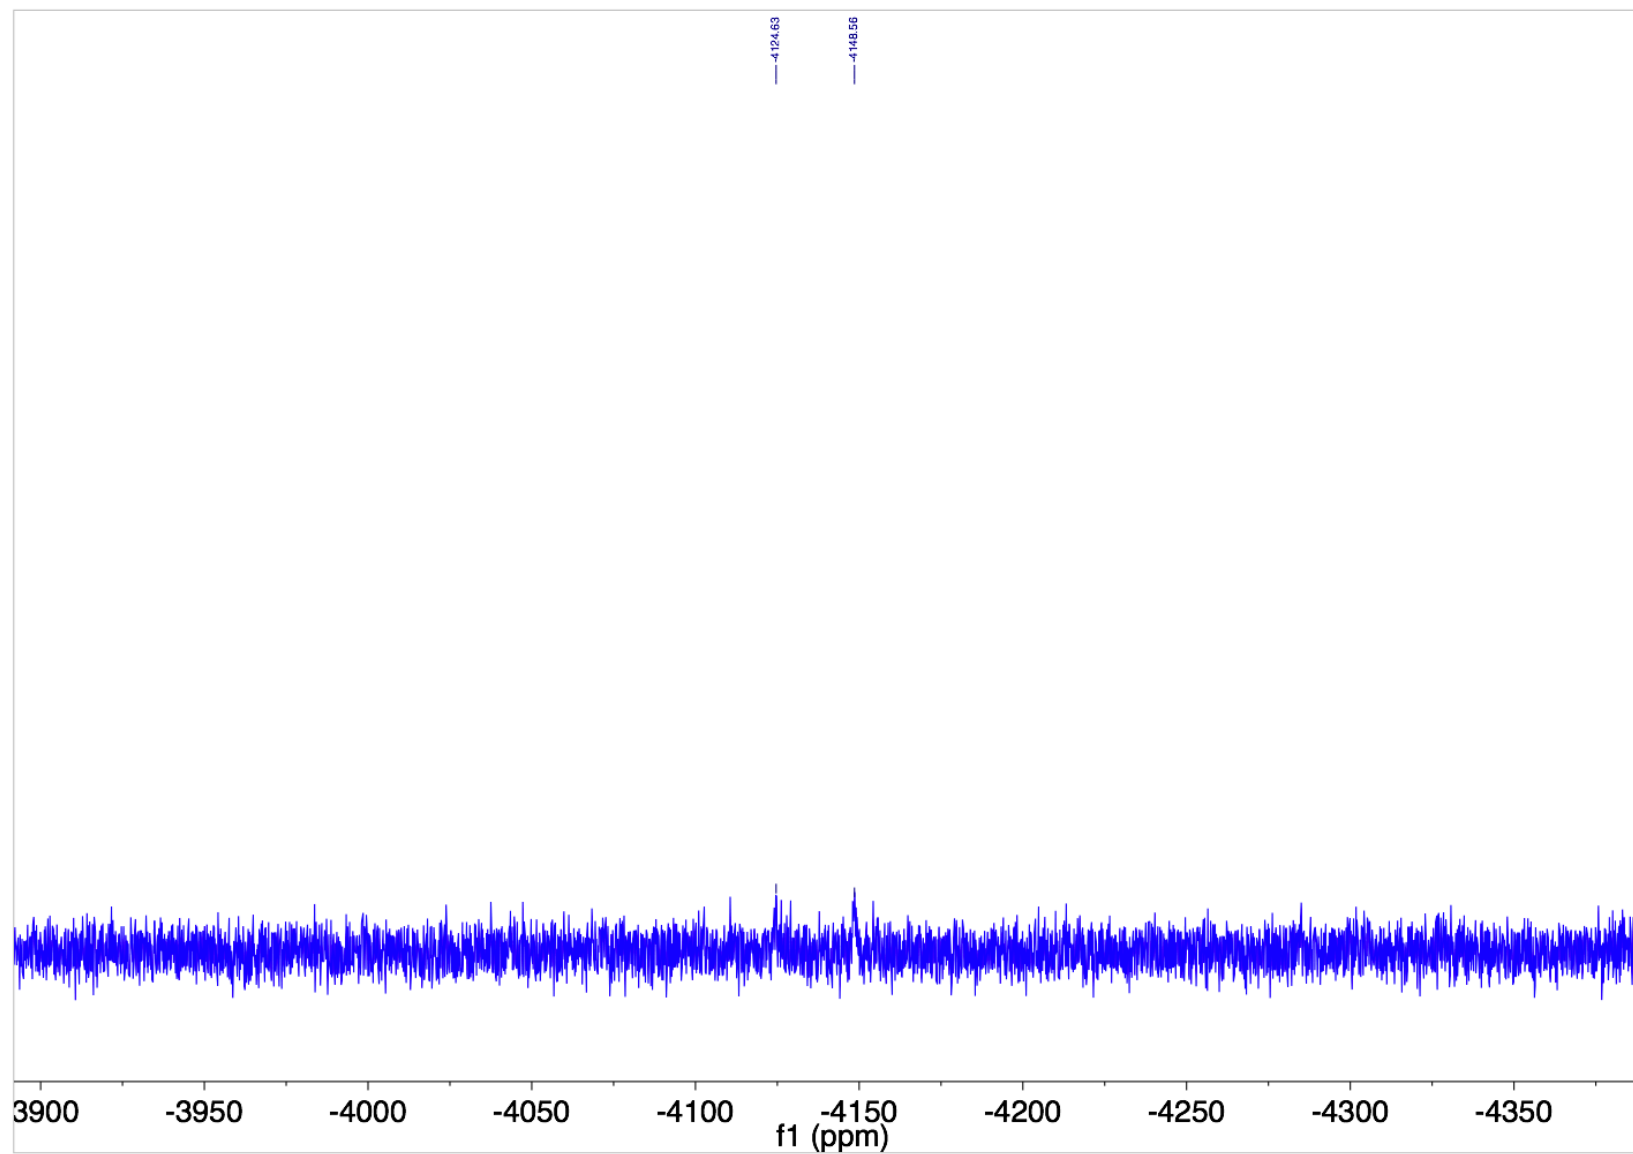

**Figure S53.**  $^{195}\text{Pt}\{^1\text{H}\}$  NMR Spectrum (150 MHz,  $\text{CDCl}_3$ , 298 K,  $\delta$ ) of  $[\text{WPt}(\mu\text{-CCNC}_6\text{H}_2\text{Me}_3)(\text{CO})_2(\text{CNC}_6\text{H}_2\text{Me}_3)(\text{PPh}_3)(\text{Tp}^*)]\text{PF}_6$  [**5b**] $\text{PF}_6$ .



## SUPPORTING INFORMATION

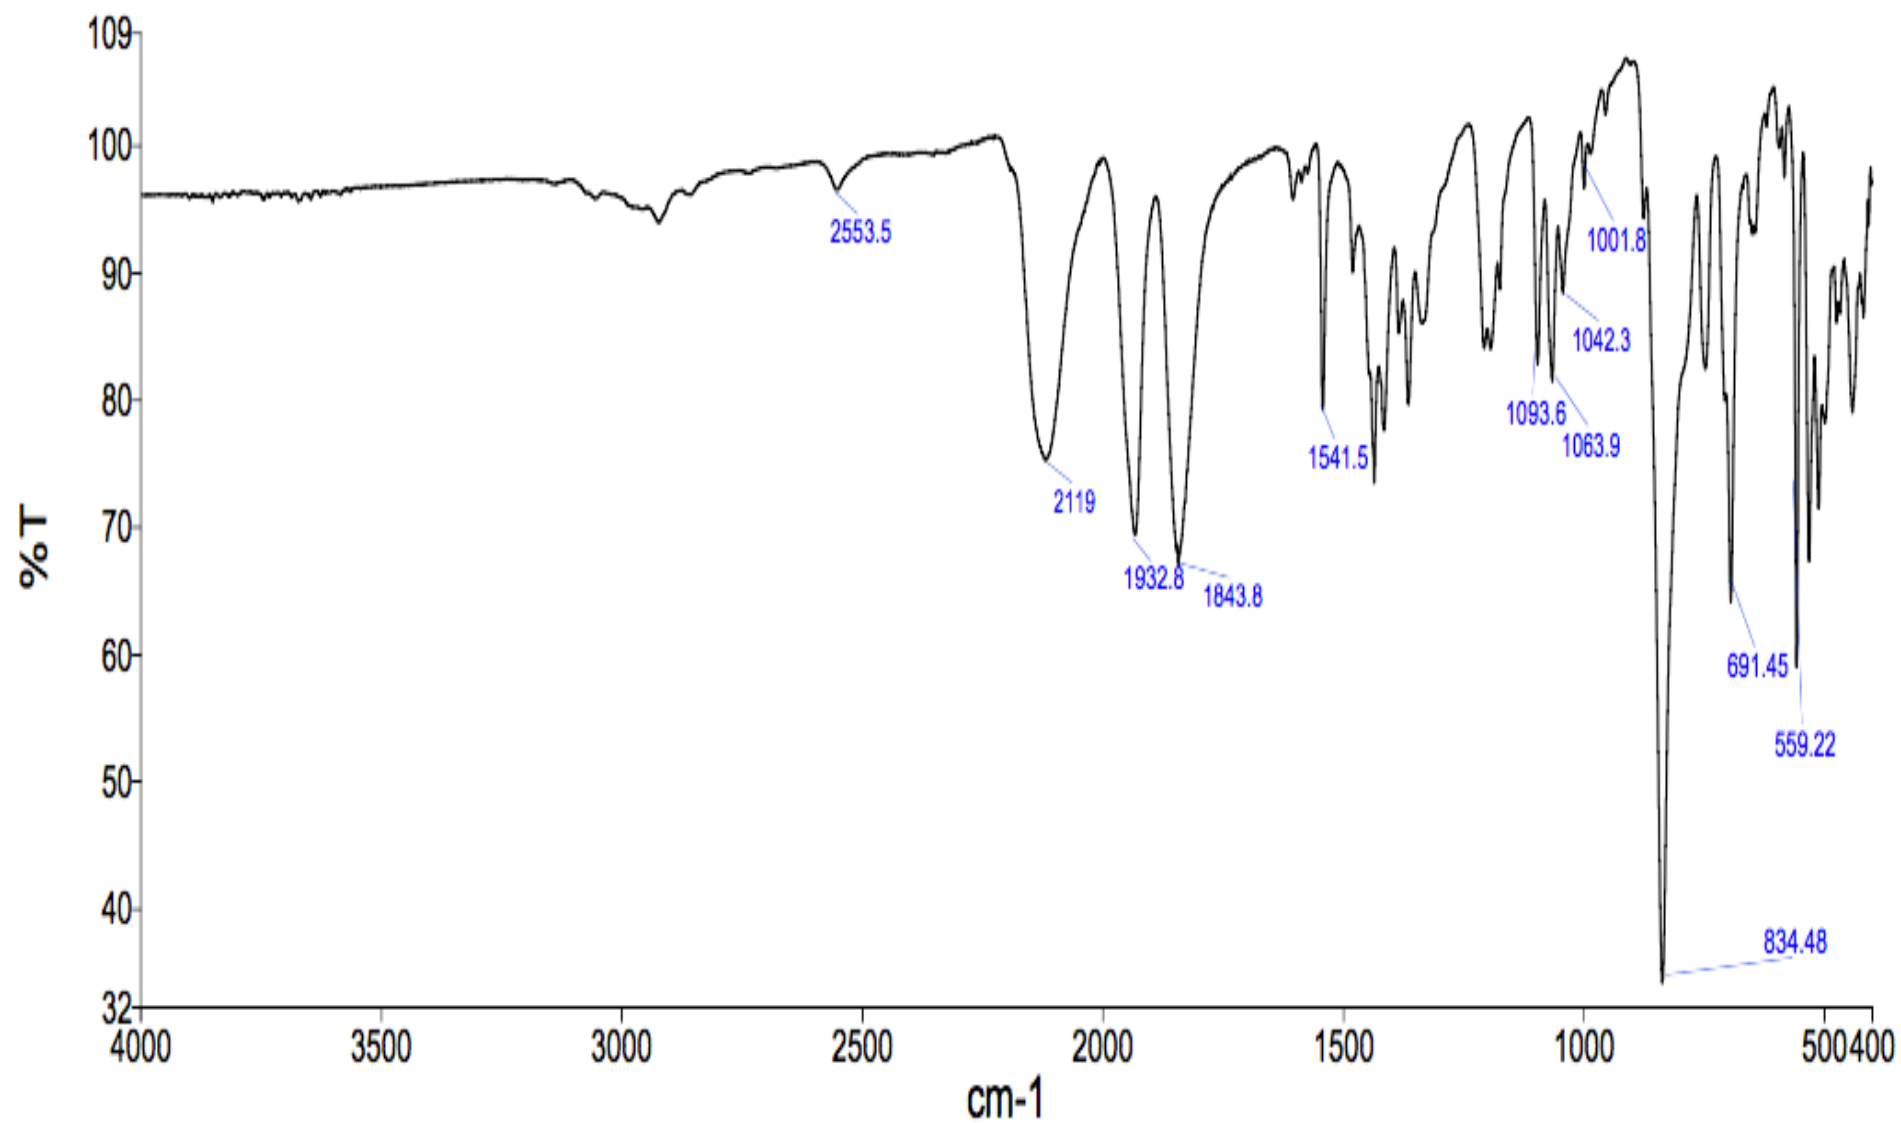

Figure S54. Infrared Spectrum (CH<sub>2</sub>Cl<sub>2</sub>, 298 K, cm<sup>-1</sup>) of [WPt(μ-CCNC<sub>6</sub>H<sub>2</sub>Me<sub>3</sub>)(CO)<sub>2</sub>(CNC<sub>6</sub>H<sub>2</sub>Me<sub>3</sub>)(PPh<sub>3</sub>)(Tp<sup>\*</sup>)]PF<sub>6</sub> [5b]PF<sub>6</sub>.

## SUPPORTING INFORMATION

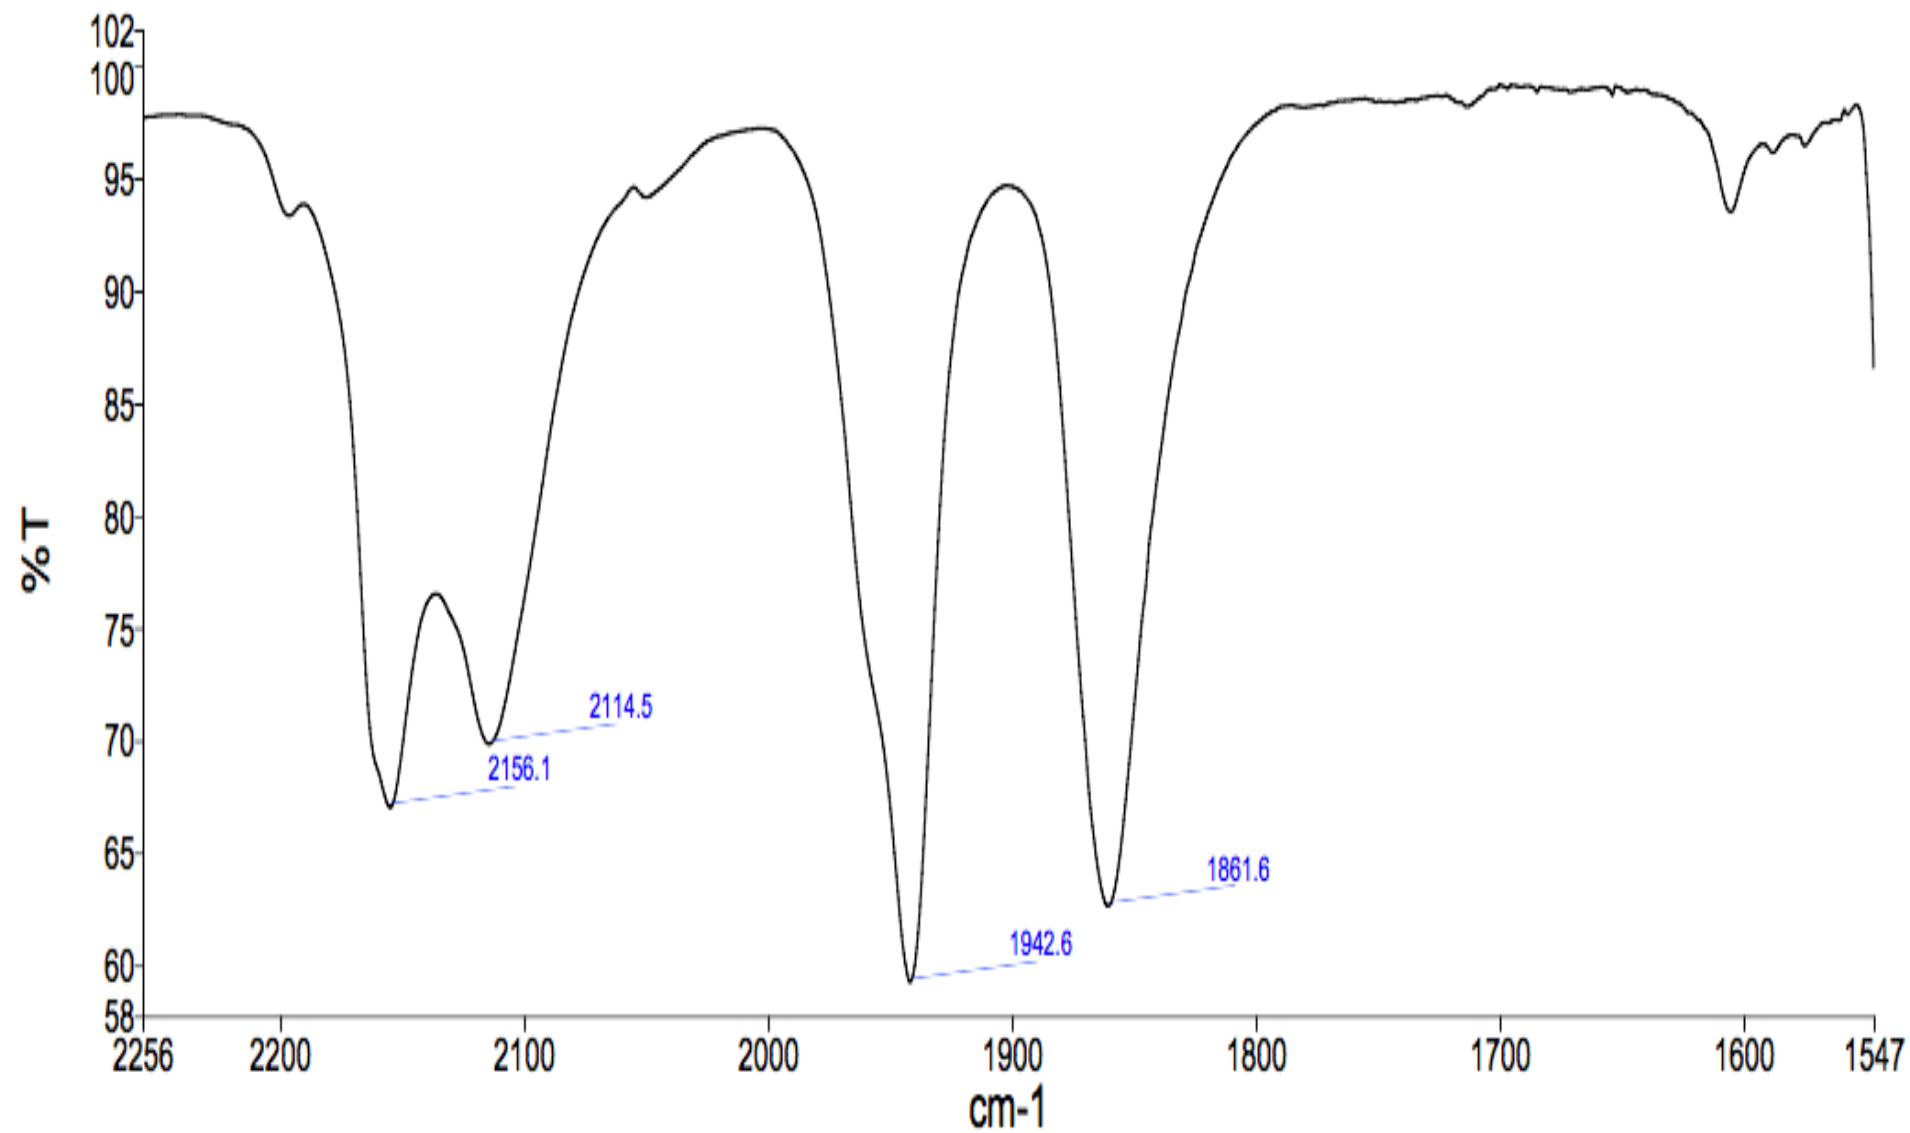

Figure S55. Infrared Spectrum (ATR, diamond anvil, 298 K, cm<sup>-1</sup>) of [WPt(μ-CCNC<sub>6</sub>H<sub>2</sub>Me<sub>3</sub>)(CO)<sub>2</sub>(CNC<sub>6</sub>H<sub>2</sub>Me<sub>3</sub>)(PPh<sub>3</sub>)(Tp<sup>\*</sup>)]PF<sub>6</sub> [5b]PF<sub>6</sub>.

## Elemental Composition Report

## Single Mass Analysis

Tolerance = 3.0 PPM / DBE: min = -1.5, max = 36.0

Element prediction: Off

Number of isotope peaks used for i-FIT = 3

Monoisotopic Mass, Odd and Even Electron Ions

988 formula(e) evaluated with 1 results within limits (up to 50 best isotopic matches for each mass)

Elements Used:

C: 0-60 H: 0-60 11B: 0-2 N: 0-8 O: 0-2 P: 0-2 184W: 0-1 195Pt: 0-1

LB-5-70/AJ

SYNAPT G2-Si#NotSet

66376

12-Feb-2021

0130A 100 (0.217) Cm (99:105)

12:56:50

1: TOF MS ES+  
5.33e+006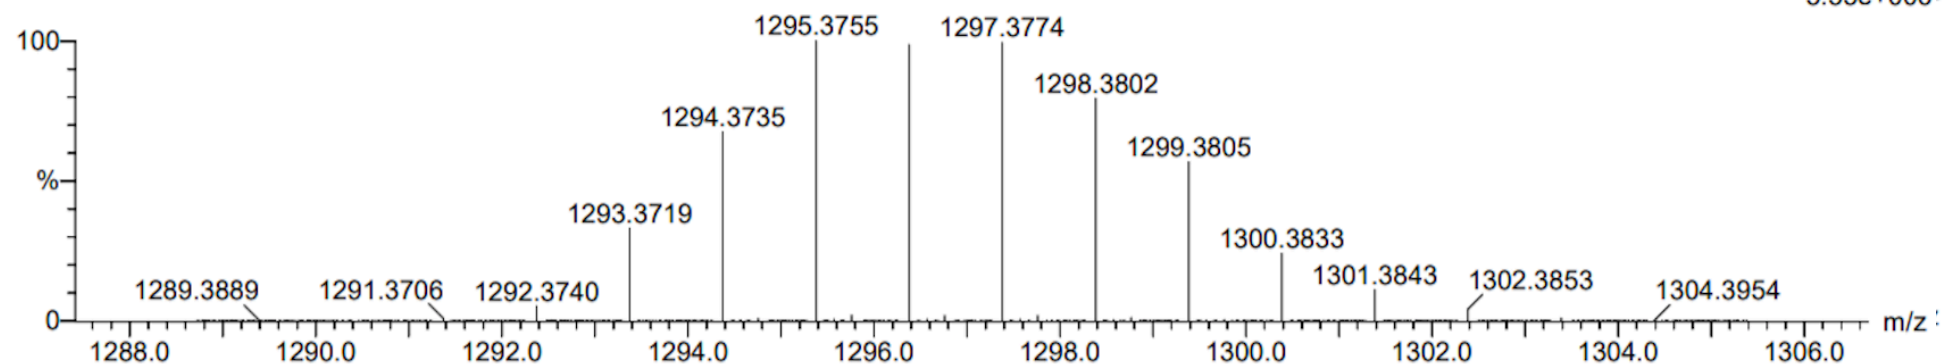

Minimum: -1.5  
 Maximum: 5.0 3.0 36.0

| Mass      | Calc. Mass | mDa | PPM | DBE  | i-FIT | Norm | Conf (%) | Formula                                                                        |
|-----------|------------|-----|-----|------|-------|------|----------|--------------------------------------------------------------------------------|
| 1296.3772 | 1296.3749  | 2.3 | 1.8 | 35.0 | 919.0 | n/a  | n/a      | C <sub>56</sub> H <sub>59</sub> 11B N <sub>8</sub> O <sub>2</sub> P 184W 195Pt |

Figure S56. ESI Mass Spectrum (+ve ion) of [WPt( $\mu$ -CCNC<sub>6</sub>H<sub>2</sub>Me<sub>3</sub>)(CO)<sub>2</sub>(CNC<sub>6</sub>H<sub>2</sub>Me<sub>3</sub>)(PPh<sub>3</sub>)(Tp\*)]PF<sub>6</sub> [5b]PF<sub>6</sub>.

# SUPPORTING INFORMATION

LB-5-70/AJ

66376

0130A 100 (0.217) Cm (99:105)

SYNAPT G2-Si#NotSet

12-Feb-2021

12:56:50

1: TOF MS ES+

5.33e6

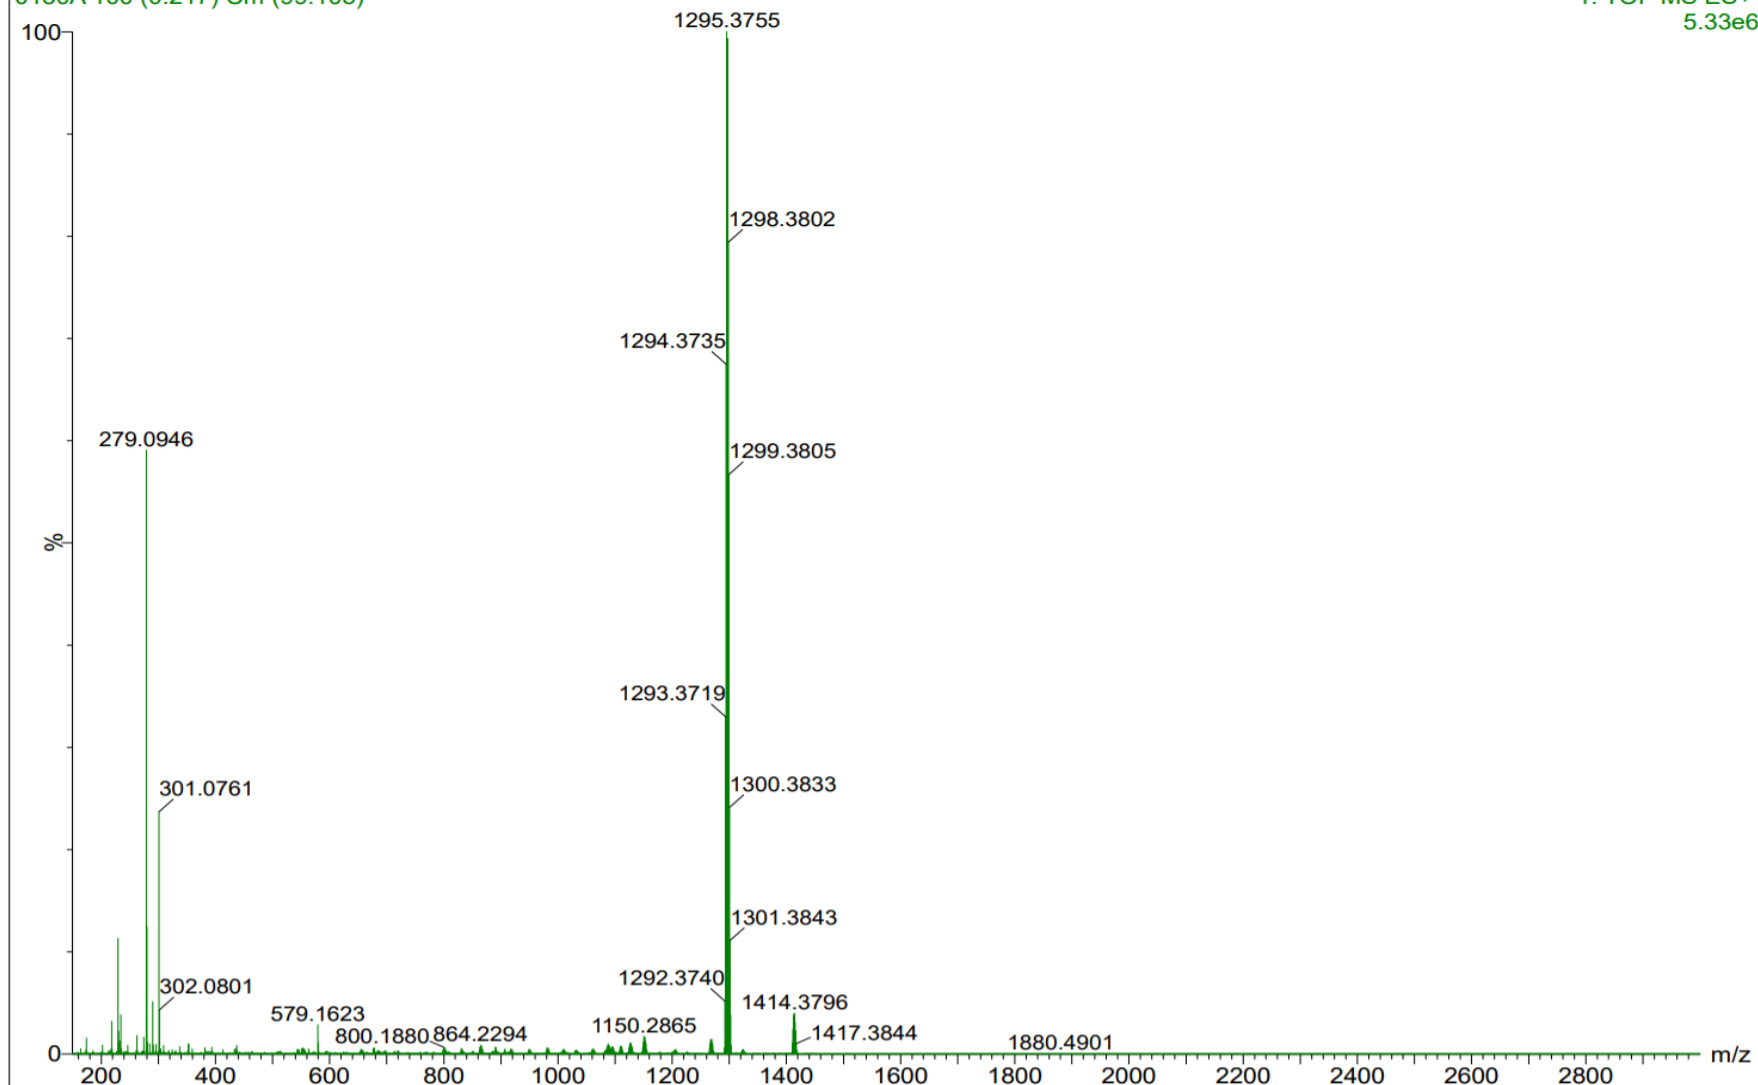

Figure S57. ESI Mass Spectrum (+ve ion) of  $[\text{WPt}(\mu\text{-CCNC}_6\text{H}_2\text{Me}_3)(\text{CO})_2(\text{CNC}_6\text{H}_2\text{Me}_3)(\text{PPh}_3)(\text{Tp}^*)]\text{PF}_6$  [5b] $\text{PF}_6$  (cont.)

# SUPPORTING INFORMATION

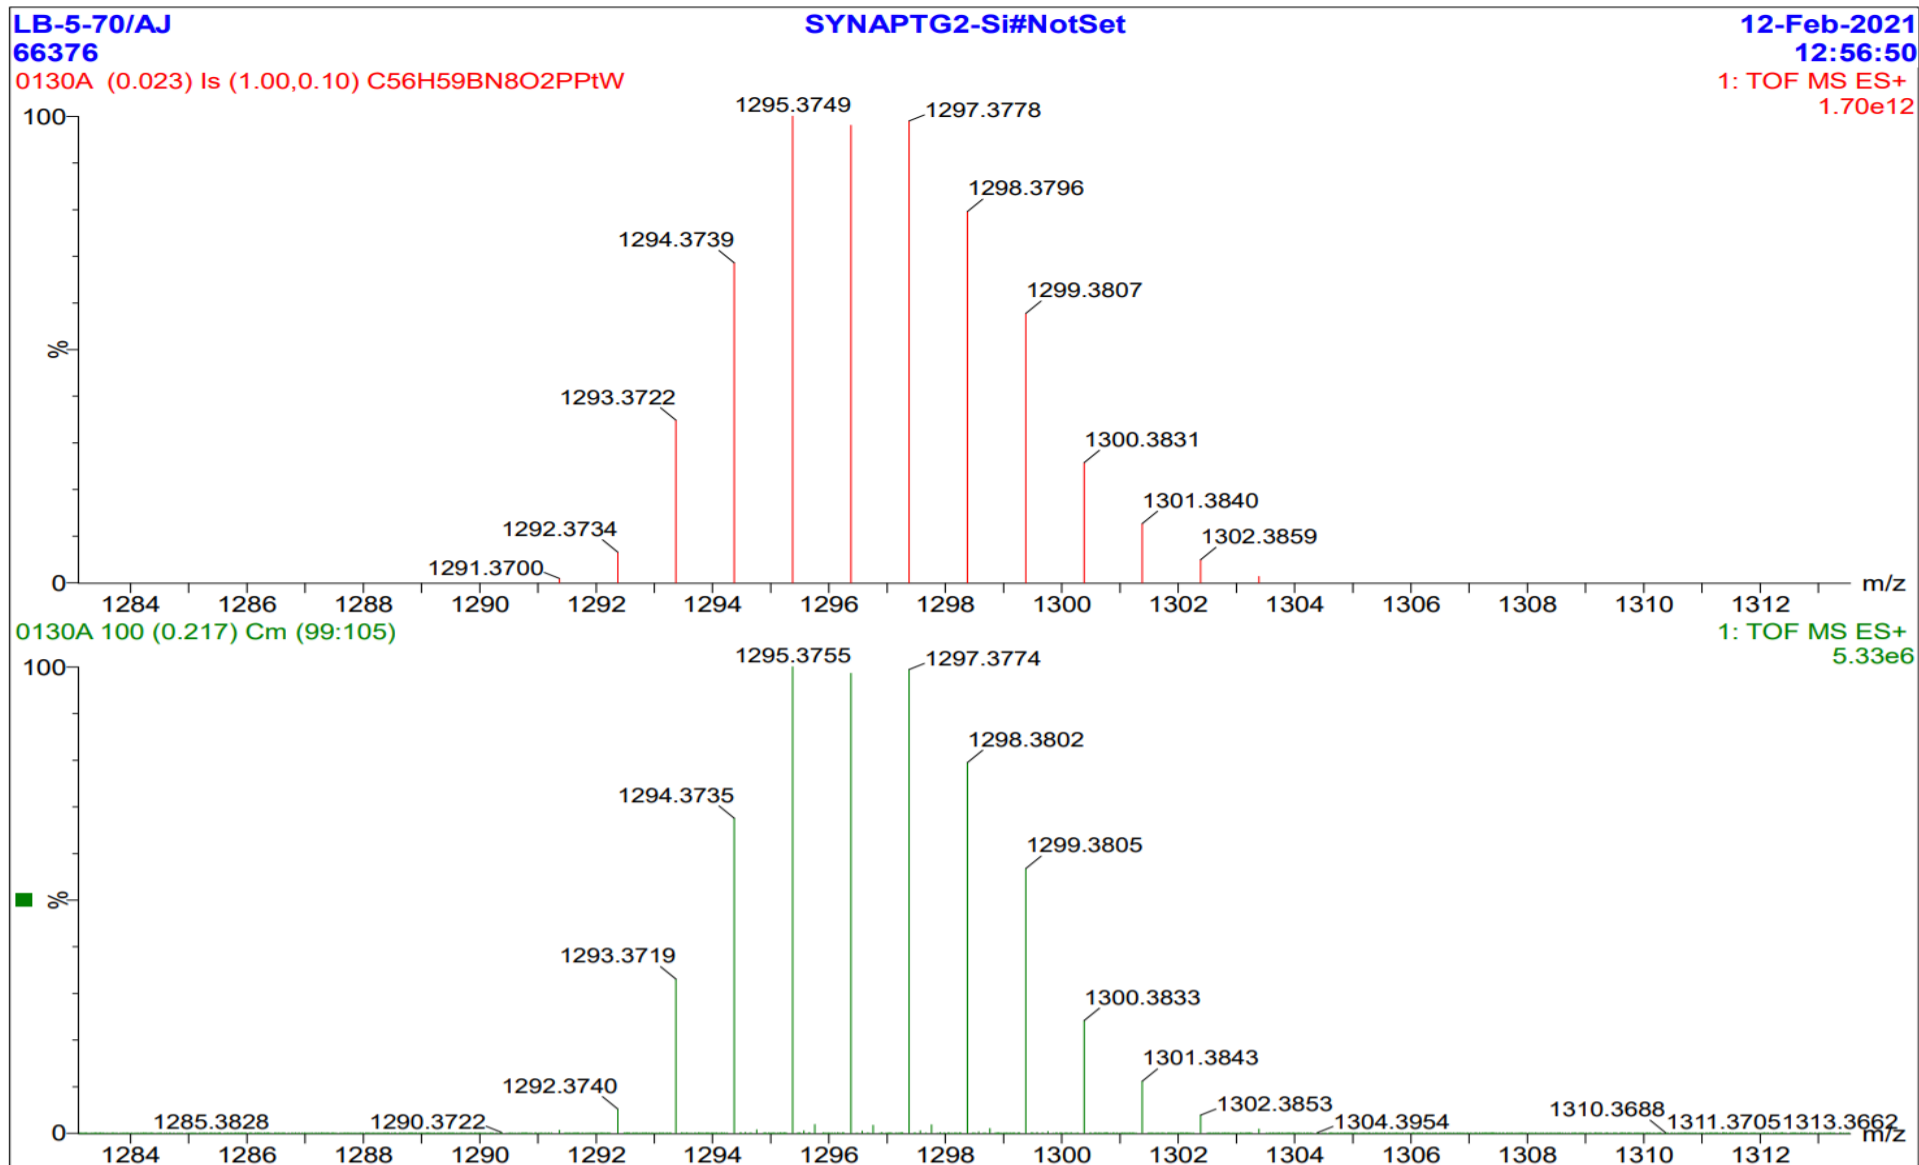

**Figure S58.** ESI Mass Spectrum (top = measured; bottom = isotopic simulation) of  $[\text{WPt}(\mu\text{-CCNC}_6\text{H}_2\text{Me}_3)(\text{CO})_2(\text{PPh}_3)_2(\text{Tp}^*)] ([5\text{a}]\text{BPh}_4)$

## SUPPORTING INFORMATION

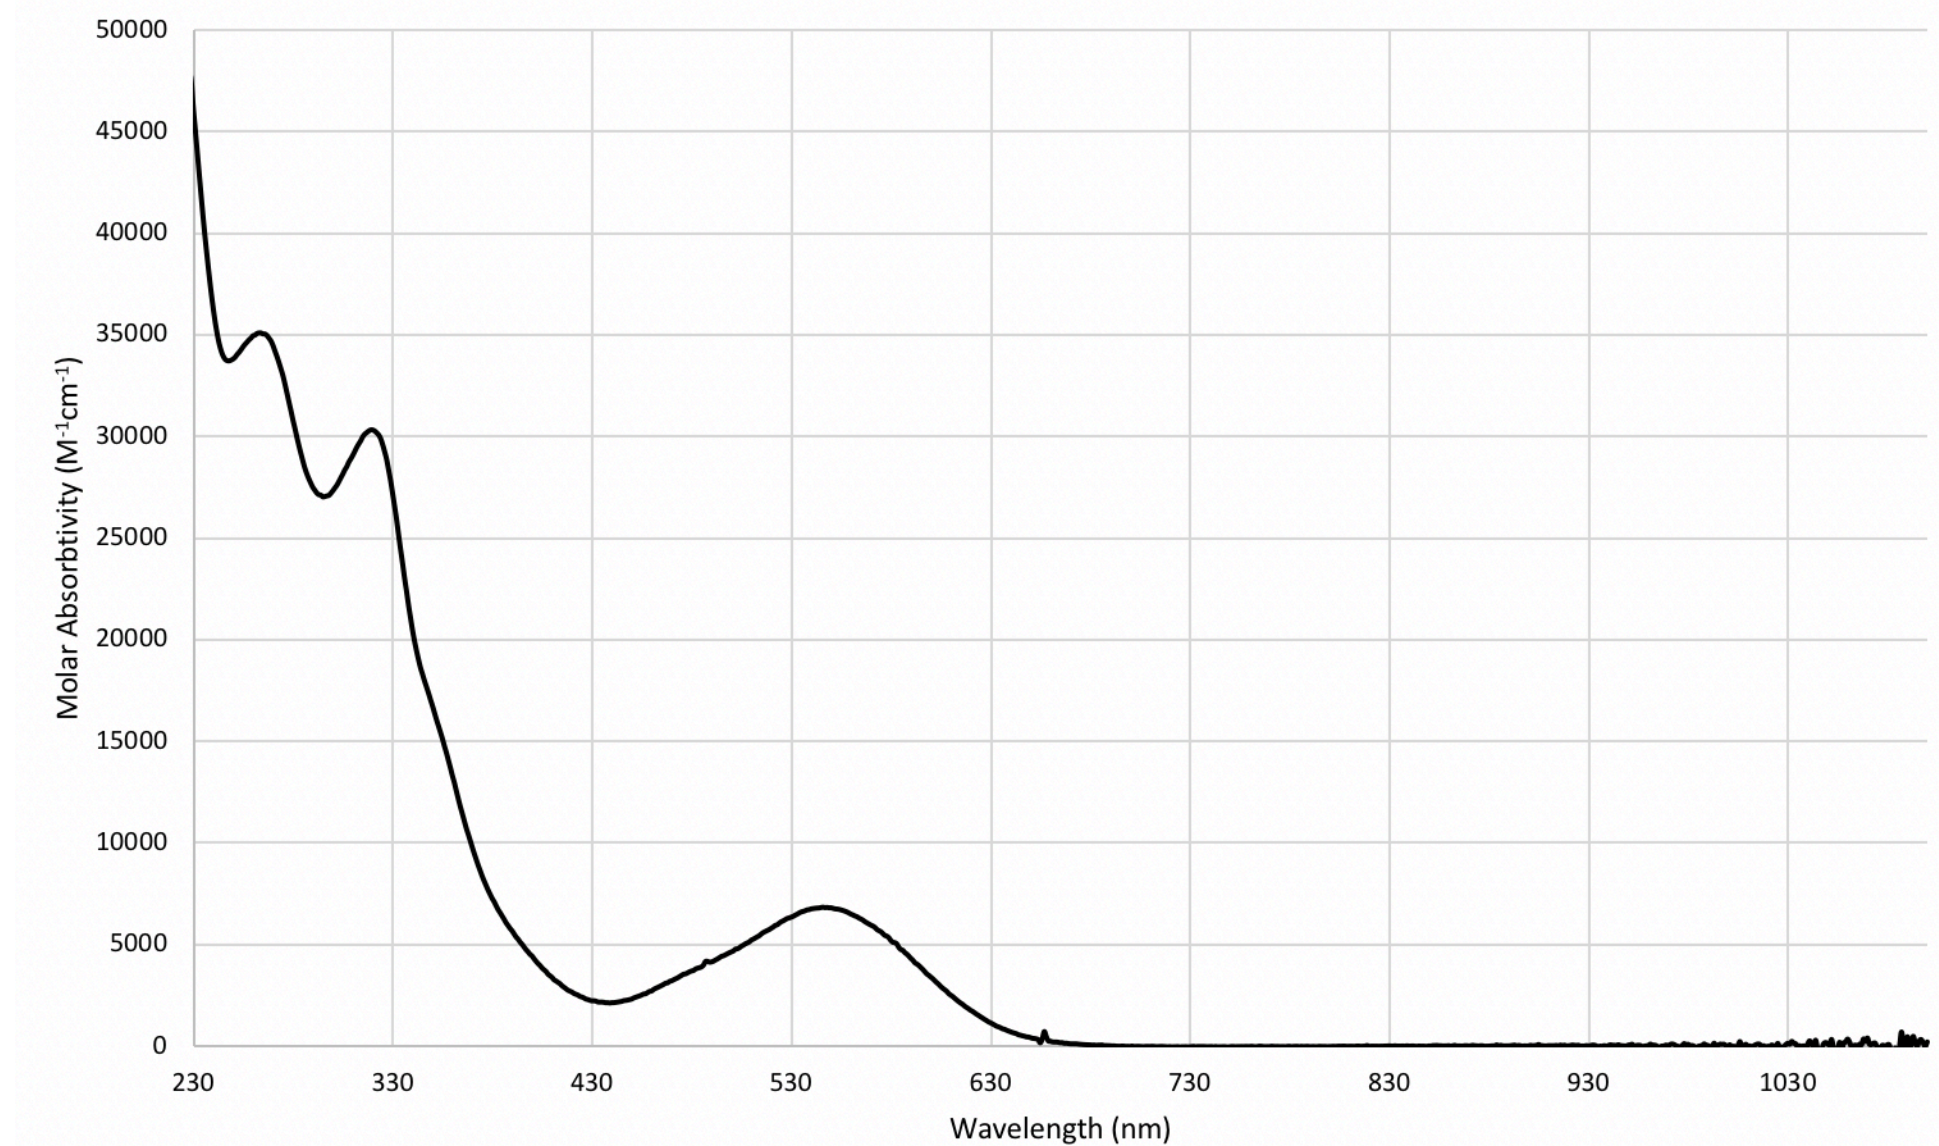

Figure 59. Electronic spectrum of [WPt( $\mu$ -CCNC<sub>6</sub>H<sub>2</sub>Me<sub>3</sub>-2,4,6)(PPh<sub>3</sub>)(CNC<sub>6</sub>H<sub>2</sub>Me<sub>3</sub>-2,4,6)(CO)<sub>2</sub>(Tp\*)].BPh<sub>4</sub> ([5b]PF<sub>6</sub>) in CH<sub>2</sub>Cl<sub>2</sub>
